# Supplementary material for: Synthesis of [4.6] spirocarbocycles: a base-promoted ring-expansion and subsequent I2-mediated regioselective spirocyclization protocol
Source: Royal Society of Chemistry journal article supplement (doi:10.1039/d4qo01632g), 2024-01-01

## Supporting Information

### Synthesis of [4.6] Spirocarbocycles: A Base-promoted Ring- Expansion and Subsequent I<sub>2</sub>-mediated Regioselective Spirocyclization Protocol

Nana Fei, † Zongkang Wang, † Peng He, † Qiongwen Kang, † Yan Wang, † Chengyu Wang\*‡, and Yanzhong Li\*†

† School of Chemistry and Molecular Engineering, East China Normal University, 500 Dongchuan Road, Shanghai, 200241, China

‡ School of Chemistry and Chemical Engineering, Linyi University, Shuangling Road, Linyi, Shandong, 276000, China

E-mail: [yzli@chem.ecnu.edu.cn](mailto:yzli@chem.ecnu.edu.cn)

[wangchengyu@lyu.edu.cn](mailto:wangchengyu@lyu.edu.cn)

### Table of Contents

|                                                                   |     |
|-------------------------------------------------------------------|-----|
| 1. General methods .....                                          | S2  |
| 2. Synthesis of <b>1</b> .....                                    | S3  |
| 3. Reference .....                                                | S7  |
| 4. Synthesis of <b>3</b> .....                                    | S7  |
| 5. 1.0 mmol scale reaction for the preparation of <b>3a</b> ..... | S19 |
| 6. Synthetic transformations of compound <b>3a</b> .....          | S19 |
| 7. Mechanistic study .....                                        | S22 |
| 8. NMR Copies of all the Synthesized New Starting Materials ..... | S24 |
| 9. Copies of spectra of products .....                            | S33 |
| 10. X-ray crystallography of compound <b>3a</b> .....             | S62 |

## 1. General methods

Unless noted, all commercial reagents were used without further purification. DMSO is dried in calcium hydride and re-evaporated for use. Reactions were monitored by thin layer chromatography. Purification of reaction products was carried out by flash chromatography on silica gel (200~300 mesh).  $^1\text{H}$  NMR spectra were recorded at 500 MHz or 600 MHz,  $^{13}\text{C}$  NMR spectra were recorded at 125 MHz or 150 MHz, and in  $\text{CDCl}_3$  (containing 0.03% TMS) solutions.  $^1\text{H}$  NMR spectra were recorded with tetramethylsilane ( $\delta = 0.00$  ppm) as internal reference;  $^{13}\text{C}$  NMR spectra were recorded with  $\text{CDCl}_3$  ( $\delta = 77.00$  ppm) as internal reference. High-resolution mass spectra were recorded on a mass spectrometer with a TOF (for EI or ESI) or FT-ICR (for MALDI) analyzer. Single crystal X-ray diffraction data was collected in Bruker SMARTAPEX diffractometers with molybdenum cathodes.

The crystal preparation and measurement methods of **3a** as follows: Place 60.0 mg of **3a** in a 50 ml round bottom flask, dissolve **3a** with 3 mL of dichloromethane, then add 30 mL of petroleum ether and shake well, seal the flask with a sealing film, pierce a few holes, and let it stand still at room temperature until crystals precipitate out. The crystal was carefully picked out from the solvent with a spatula, and observed under a microscope to confirm that it was transparent for single crystal X-ray diffraction.

## 2. Synthesis of 1

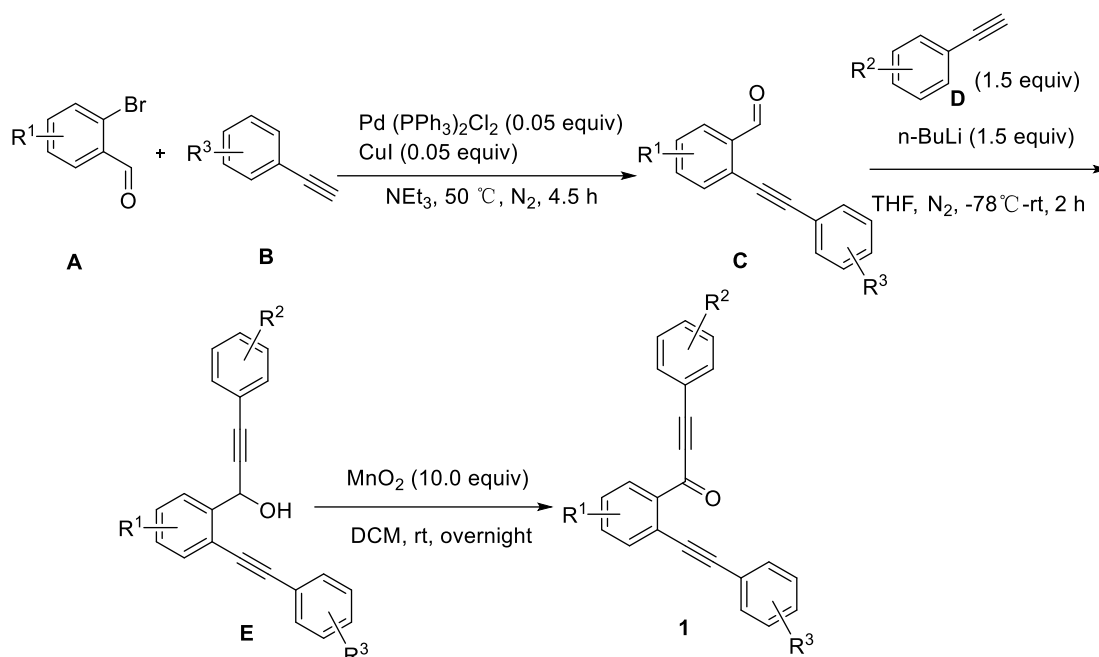

2-Bromobenzaldehyde derivatives **A** (3.0 mmol), Pd(PPh<sub>3</sub>)<sub>2</sub>Cl<sub>2</sub> (0.15 mmol, 0.05 equiv, 105.3 mg) and CuI (0.15 mmol, 0.05 equiv, 28.6 mg) were dissolved in dry Et<sub>3</sub>N (9 mL) in a schlenk flask under a nitrogen atmosphere at 50 °C using an oil bath. The corresponding terminal alkyne **B** (3.75 mmol, 1.25 equiv) was added and the reaction mixture was stirred for 4.5 h. After the completion of the reaction as monitored by TLC, the reaction mixture was quenched with a saturated solution of NH<sub>4</sub>Cl and extracted with ethyl acetate (5 mL × 3). The combined organic layers were washed with brine and dried over anhydrous Na<sub>2</sub>SO<sub>4</sub>, filtered, and concentrated under reduced pressure. Finally, the crude product was purified by column chromatography (silica gel, petroleum ether/EtOAc) to get pure 2-(arylethynyl)benzaldehyde derivatives **C**.

To a solution of alkyne **D** (1.5 equiv) in dry THF at -78 °C under a nitrogen, n-BuLi (2.5 M in hexanes, 1.5 equiv) was added slowly and stirred for 1 h at -78 °C and then a solution of 2-(arylethynyl)benzaldehyde **C** (2.0 mmol) in THF was added slowly. The resulting mixture was stirred for 1 h at room temperature. After completion of the reaction as indicated by TLC, the reaction mixture was quenched by aqueous sat. NH<sub>4</sub>Cl solution and the organic layer was extracted with EtOAc (5 mL × 3) and dried over anhydrous Na<sub>2</sub>SO<sub>4</sub>. The organic layer was concentrated under reduced pressure. The obtained crude product was used directly in the next step.

MnO<sub>2</sub> (10.0 equiv) was added to a solution of the alcohol derivatives **E** in DCM and stirred at room temperature overnight. After completion of the reaction as monitored by TLC, the reaction mixture was filtered through Celite and concentrated under

reduced pressure. The residue was purified by column chromatography to yield the corresponding 1,6-diyn-3-ones **1**.

The aryl-fused 1,6-diyn-3-ones **1a,1c, 1d, 1e, 1g, 1h, 1i, 1l, 1n, 1o, 1p** and **1q** are reported in the literature, and the analytical data of the synthesized compounds are in good accordance with the literature data<sup>1,2,3,4</sup>.

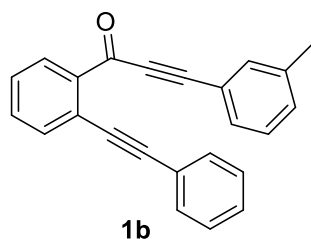

**1-(2-(phenylethynyl)phenyl)-3-(m-tolyl)prop-2-yn-1-one (1b)**. Yellow oil, purified by chromatography on silica gel (petroleum ether/ethyl acetate = 30:1); yield: 78%, 500.2 mg. <sup>1</sup>H NMR (500 MHz, CD<sub>2</sub>Cl<sub>2</sub>) δ 8.19-8.18 (m, 1H), 7.68-7.67 (m, 1H), 7.57-7.54 (m, 3H), 7.49-7.46 (m, 1H), 7.43-7.41 (m, 2H), 7.324-7.318 (m, 3H), 7.25-7.24 (m, 2H), 2.29 (s, 3H). <sup>13</sup>C NMR (125 MHz, CD<sub>2</sub>Cl<sub>2</sub>) δ 177.2, 138.6, 138.3, 134.3, 133.5, 132.5, 131.8, 131.7, 131.6, 130.1, 128.7, 128.5, 128.4, 128.1, 123.1, 122.7, 119.8, 95.1, 93.4, 88.3, 87.7, 20.8. HRMS (ESI) m/z: [M+Na]<sup>+</sup> calcd for C<sub>24</sub>H<sub>16</sub>NaO 343.1093, found 343.1094.

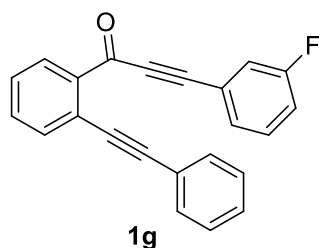

**3-(3-fluorophenyl)-1-(2-(phenylethynyl)phenyl)prop-2-yn-1-one (1g)**. Yellow oil, purified by chromatography on silica gel (petroleum ether/ethyl acetate = 30:1); yield: 75%, 489.1 mg. <sup>1</sup>H NMR (600 MHz, DMSO-d<sub>6</sub>) δ 8.29-8.27 (m, 1H), 7.77-7.72 (m, 2H), 7.66-7.65 (m, 1H), 7.64-7.61 (m, 1H), 7.58-7.57 (m, 1H), 7.55-7.53 (m, 2H), 7.53-7.50 (m, 1H), 7.45-7.39 (m, 4H). <sup>13</sup>C NMR (150 MHz, DMSO-d<sub>6</sub>) δ 175.8, 161.2 (d, J=244.1 Hz), 136.8, 133.8, 133.1, 131.5, 131.0, 130.7 (d, J=8.9 Hz), 128.9 (d, J=3.0 Hz), 128.7, 128.6, 128.2, 121.7, 121.1, 120.4 (d, J=7.9 Hz), 119.0 (d, J=23.6 Hz), 118.2 (d, J=21.2 Hz), 94.3, 90.6, 87.6, 87.2. <sup>19</sup>F NMR (471 MHz, CDCl<sub>3</sub>) δ -111.82. HRMS (SI) m/z: [M+Na]<sup>+</sup> calcd for C<sub>23</sub>H<sub>13</sub>FNao 347.0843, found 347.0847.

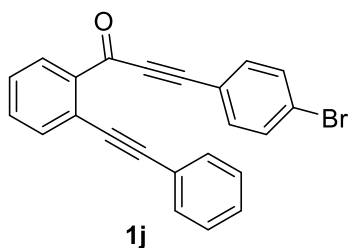

**3-(4-bromophenyl)-1-(2-(phenylethynyl)phenyl)prop-2-yn-1-one (1j).** Yellow oil, purified by chromatography on silica gel (petroleum ether/ethyl acetate = 30:1); yield: 82%, 629.9 mg.  $^1\text{H}$  NMR (500 MHz,  $\text{CD}_2\text{Cl}_2$ )  $\delta$  8.17-8.15 (m, 1H), 7.68-7.67 (m, 1H), 7.58-7.54 (m, 3H), 7.51-7.45 (m, 5H), 7.33-7.32 (m, 3H).  $^{13}\text{C}$  NMR (125 MHz,  $\text{CD}_2\text{Cl}_2$ )  $\delta$  176.5, 137.6, 133.91, 133.90, 132.2, 131.5, 131.3, 131.1, 128.3, 128.0, 127.7, 125.0, 122.6, 122.4, 118.7, 94.8, 91.1, 88.2, 87.7. HRMS (ESI)  $m/z$ :  $[\text{M}+\text{Na}]^+$  calcd for  $\text{C}_{23}\text{H}_{13}\text{BrNaO}$  407.0042, found 407.0043.

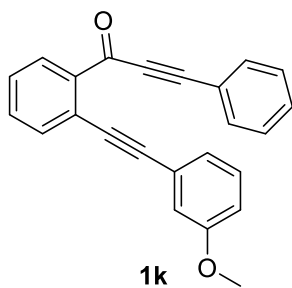

**1-(2-((3-methoxyphenyl)ethynyl)phenyl)-3-phenylprop-2-yn-1-one (1k).** Light yellow oil, purified by chromatography on silica gel (petroleum ether/ethyl acetate = 30:1); yield: 58%, 393.3 mg.  $^1\text{H}$  NMR (500 MHz,  $\text{CD}_2\text{Cl}_2$ )  $\delta$  8.20-8.18 (m, 1H), 7.69-7.67 (m, 1H), 7.63-7.62 (m, 2H), 7.58-7.55 (m, 1H), 7.50-7.43 (m, 2H), 7.38-7.35 (m, 2H), 7.24-7.21 (m, 1H), 7.16-7.15 (m, 1H), 7.07 (s, 1H), 6.89-6.88 (m, 1H), 3.73 (s, 3H).  $^{13}\text{C}$  NMR (125 MHz,  $\text{CD}_2\text{Cl}_2$ )  $\delta$  176.7, 159.0, 137.9, 133.9, 132.6, 132.1, 131.1, 130.4, 129.0, 128.21, 127.7, 123.9, 123.6, 122.2, 119.6, 115.8, 115.0, 94.6, 92.5, 87.55, 87.49, 54.8. HRMS (ESI)  $m/z$ :  $[\text{M}+\text{Na}]^+$  calcd for  $\text{C}_{24}\text{H}_{16}\text{NaO}_2$  359.1043, found 359.1049.

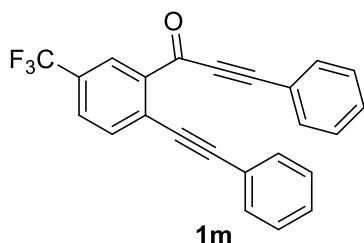

**3-phenyl-1-(2-(phenylethynyl)-5-(trifluoromethyl)phenyl)prop-2-yn-1-one (1m).** Brown oil, purified by chromatography on silica gel (petroleum ether/ethyl acetate = 30:1); yield: 40%, 301.7 mg.  $^1\text{H}$  NMR (500 MHz,  $\text{CDCl}_3$ )  $\delta$  8.42 (s, 1H), 7.80-7.76 (m,

2H), 7.62-7.56 (m, 4H), 7.47-7.44 (m, 1H), 7.38-7.33 (m, 4H), 7.31-7.30 (m, 1H).  $^{13}\text{C}$  NMR (125 MHz,  $\text{CDCl}_3$ )  $\delta$  176.1, 138.6, 134.7, 133.2, 132.1, 131.1, 129.8 (q,  $J=33.3\text{Hz}$ ), 129.2, 128.2 (q,  $J=3.5\text{Hz}$ ), 128.6, 128.4, 128.2 (q,  $J=3.9\text{Hz}$ ), 126.6, 123.4 (q,  $J=270.8\text{Hz}$ ), 122.4, 119.8, 98.4, 94.7, 87.7, 87.1.  $^{19}\text{F}$  NMR (471 MHz,  $\text{CDCl}_3$ )  $\delta$ -62.92. HRMS (ESI)  $m/z$ :  $[\text{M}+\text{Na}]^+$  calcd for  $\text{C}_{24}\text{H}_{13}\text{F}_3\text{NaO}$  397.0811, found 397.0814.

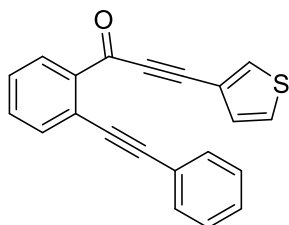

**1p**

**1-(2-(phenylethynyl)phenyl)-3-(thiophen-3-yl)prop-2-yn-1-one (1p)**. Brown oil, purified by chromatography on silica gel (petroleum ether/ethyl acetate = 30:1); yield: 80%, 502.1 mg.  $^1\text{H}$  NMR (500 MHz,  $\text{DMSO-d}_6$ ) 8.27-8.20 (m, 2H), 7.73-7.68 (m, 3H), 7.62-7.59 (m, 1H), 7.54-7.53 (m, 2H), 7.39-7.37 (m, 4H).  $^{13}\text{C}$  NMR (125 MHz,  $\text{DMSO-d}_6$ )  $\delta$  177.0, 138.1, 136.5, 134.7, 133.7, 132.1, 131.9, 130.6, 129.6, 129.4, 129.2, 128.3, 122.8, 122.0, 118.6, 95.2, 89.5, 88.7, 88.2. HRMS (ESI)  $m/z$ :  $[\text{M}+\text{Na}]^+$  calcd for  $\text{C}_{21}\text{H}_{12}\text{NaOS}$  397.0811, found 397.0814.

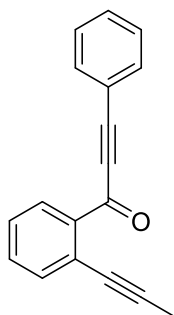

**1r**

**3-phenyl-1-(2-(prop-1-yn-1-yl)phenyl)prop-2-yn-1-one (1r)**. Brown oil, purified by chromatography on silica gel (petroleum ether/ethyl acetate = 50:1); yield: 50%, 270.4 mg.  $^1\text{H}$  NMR (600 MHz,  $\text{CDCl}_3$ ) 8.10 (d,  $J=7.8\text{ Hz}$ , 1H), 7.65 (d,  $J=8.4\text{ Hz}$ , 2H), 7.54-7.53 (m, 1H), 7.49-7.45 (m, 2H), 7.41-7.39 (m, 3H), 2.07 (s, 3H).  $^{13}\text{C}$  NMR (150 MHz,  $\text{CDCl}_3$ )  $\delta$  177.8, 138.4, 134.5, 133.0, 132.3, 131.1, 130.6, 128.6, 127.3, 123.8, 120.3, 93.1, 92.8, 88.1, 78.2, 4.9. HRMS (ESI)  $m/z$ :  $[\text{M}+\text{Na}]^+$  calcd for  $\text{C}_{18}\text{H}_{12}\text{NaO}$  267.0780, found 267.0788.

### 3. Reference

- (1) N. T. Patil, N. K. Pahadi, and Y. Yamamoto, Silver(I)-Catalyzed Novel Cascade Cyclization Reactions: Incorporation of Allenes into the Isochromenes. *J. Org. Chem.*, 2005, **70**, 10096-10098.
- (2) M. Mandal, S. Sakthivel, and R. Balamurugan, Brønsted/Lewis Acid-Promoted Site-Selective Intramolecular Cycloisomerizations of Aryl-Fused 1,6-Diyn-3-ones for Diversity-Oriented Synthesis of Benzo-Fused Fluorenes and Fluorenones and Naphthyl Ketones. *J. Org. Chem.*, 2021, **86**, 333-351.
- (3) T. Ponpandian, S. Muthusubramanian, S. Rajagopal, Sequential [3 + 2] Cycloaddition/Air Oxidation Reactions: Triazoloyl Ion Assisted Oxidative Cleavage of Alkynes. *Eur. J. Org. Chem.*, 2013, 3974-3977.
- (4) F. Ye, M. Haddad, V. Michelet and V. Ratovelomanana-Vidal, Access toward fluorenone derivatives through solvent-free ruthenium trichloride mediated [2 + 2 + 2] cycloadditions, *Org. Lett.*, 2016, **18**, 5612–5615.

### 4. Synthesis of 3

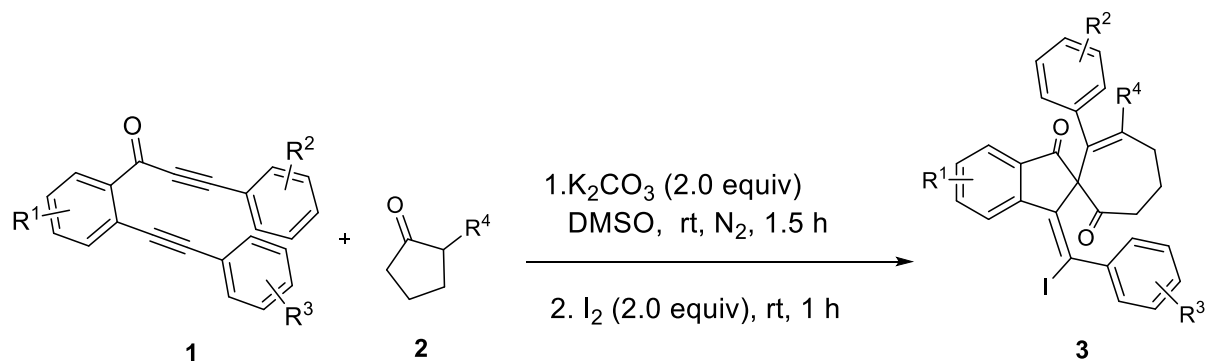

To a solution of corresponding aryl-fused 1,6-diyn-3-ones **1** (0.2 mmol, 61.2 mg) in DMSO (2.0 mL),  $\beta$ -diketones **2** (0.4 mmol, 2.0 equiv, 60  $\mu$ L) and  $K_2CO_3$  (0.4 mmol, 2.0 equiv, 55.3 mg) were added and stirred under  $N_2$  at room temperature. After 1.5 h,  $I_2$  (0.4 mmol, 2.0 equiv, 101.5 mg) was added and stirred for 1 h. After the completion of the reaction monitored by TLC, the reaction mixture was quenched with aqueous sat.  $Na_2S_2O_3$  solution (2 mL). Then the filtrate was extracted with ethyl acetate (3 mL  $\times$  3). The organic layers were combined, washed with brine, dried over anhydrous  $Na_2SO_4$ , filtered and concentrated under reduced pressure. Purification by column chromatography with petroleum ether/ethyl acetate = 10:1 as the eluent to afford **3a-3v**.

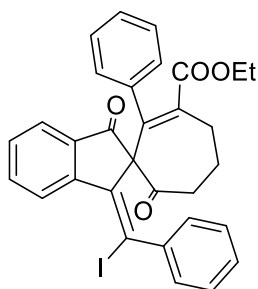

**3a**

**Ethyl** *(E)*-1'-(iodo(phenyl)methylene)-3',7-dioxo-2-phenyl-1',3'-dihydrospiro[cycloheptane-1,2'-inden]-2-ene-3-carboxylate (**3a**). Light yellow solid, purified by chromatography on silica gel (petroleum ether/ethyl acetate = 10:1); yield: 91%, 107.5 mg, m.p. 206-208 °C. <sup>1</sup>H NMR (500 MHz, CDCl<sub>3</sub>) δ 9.33 (d, *J* = 8.5 Hz, 1H), 7.68 (t, *J* = 7.5 Hz, 1H), 7.48-7.43 (m, 3H), 7.35-7.32 (m, 1H), 7.27-7.26 (m, 2H), 7.21-7.16 (m, 3H), 7.08-7.07 (m, 3H), 3.81 (q, *J* = 7.0 Hz, 2H), 3.72-3.66 (m, 1H), 2.23 (t, *J* = 7.5 Hz, 1H), 2.03-1.95 (m, 1H), 1.68-1.59 (m, 1H), 1.55-1.52 (m, 1H), 0.82 (t, *J* = 7.5 Hz, 3H), 0.48-0.41 (m, 1H). <sup>13</sup>C NMR (125 MHz, CDCl<sub>3</sub>) δ 203.6, 195.3, 169.9, 149.0, 146.2, 139.3, 139.2, 138.3, 138.2, 135.3, 134.6, 130.1, 129.0, 128.4, 128.3, 128.2, 127.7, 127.5, 124.9, 124.7, 97.9, 83.4, 60.3, 37.1, 26.2, 24.0, 13.5. HRMS (ESI) *m/z*: [M+Na]<sup>+</sup> calcd for C<sub>31</sub>H<sub>25</sub>INaO<sub>4</sub> 611.0690, found 611.0692.

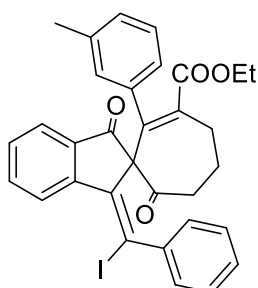

**3b**

**Ethyl** *(E)*-1'-(iodo(phenyl)methylene)-3',7-dioxo-2-(*m*-tolyl)-1',3'-dihydrospiro[cycloheptane-1,2'-inden]-2-ene-3-carboxylate (**3b**). Light yellow solid, purified by chromatography on silica gel (petroleum ether/ethyl acetate = 10:1); yield: 85%, 102.3 mg, m.p. 150-152 °C. <sup>1</sup>H NMR (500 MHz, CDCl<sub>3</sub>) δ 9.32 (d, *J* = 8.0 Hz, 1H), 7.68 (t, *J* = 8.0 Hz, 1H), 7.49-7.42 (m, 3H), 7.36-7.33 (m, 1H), 7.27-7.26 (m, 2H), 7.19-7.16 (m, 1H), 7.02-6.94 (m, 3H), 6.88-6.86 (m, 1H), 3.81 (q, *J* = 10.0 Hz, 2H), 3.74-3.69 (m, 1H), 2.24-2.20 (m, 1H), 2.17 (s, 3H), 2.03-1.95 (m, 1H), 1.65-1.63 (m, 1H), 1.55-1.52 (m, 1H), 0.84 (t, *J* = 7.5 Hz, 3H), 0.49-0.42 (m, 1H). <sup>13</sup>C NMR (125 MHz, CDCl<sub>3</sub>) δ 203.8, 195.2, 170.0, 149.1, 146.2, 139.6, 139.3, 138.2, 137.9, 137.1, 135.4, 134.5, 130.0, 128.5, 128.3, 128.2, 127.6, 125.8, 124.9, 124.8, 97.9, 83.4, 60.3, 37.2, 26.2, 24.0, 21.2, 13.5. HRMS (ESI) *m/z*: [M+Na]<sup>+</sup> calcd for C<sub>32</sub>H<sub>27</sub>INaO<sub>4</sub> 625.0846, found 625.0853.



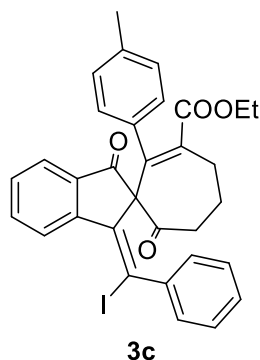

**Ethyl**                      **(E)-1'-(iodo(phenyl)methylene)-3',7-dioxo-2-(p-tolyl)-1',3'-dihydrospiro[cycloheptane-1,2'-inden]-2-ene-3-carboxylate (3c)**. Light yellow solid, purified by chromatography on silica gel (petroleum ether/ethyl acetate = 10:1); yield: 84%, 101.5 mg, m.p. 120-122 °C. <sup>1</sup>H NMR (500 MHz, CDCl<sub>3</sub>) δ 9.33 (d, *J* = 8.5 Hz, 1H), 7.69 (t, *J* = 8.5 Hz, 1H), 7.50-7.48 (m, 1H), 7.43-7.42 (m, 2H), 7.37-7.34 (m, 1H), 7.28-7.26 (m, 2H), 7.18-7.15 (m, 1H), 7.09-7.08 (m, 2H), 6.90-6.88 (m, 2H), 3.82 (q, *J* = 10.0 Hz, 2H), 3.75-3.69 (m, 1H), 3.23-3.19 (m, 1H), 2.17 (s, 3H), 2.04-1.94 (m, 1H), 1.68-1.67 (m, 1H), 1.52-1.47 (m, 1H), 0.87 (t, *J* = 7.0 Hz, 3H), 0.48-0.41 (m, 1H). <sup>13</sup>C NMR (125 MHz, CDCl<sub>3</sub>) δ 203.8, 195.3, 170.0, 149.1, 146.2, 139.5, 139.3, 138.0, 137.2, 135.44, 135.40, 134.5, 130.0, 128.8, 128.5, 128.3, 128.2, 125.0, 124.8, 97.9, 83.6, 60.3, 37.0, 26.1, 24.2, 21.0, 13.6. HRMS (ESI) *m/z*: [M+Na]<sup>+</sup> calcd for C<sub>32</sub>H<sub>27</sub>INaO<sub>4</sub> 625.0846, found 625.0853.

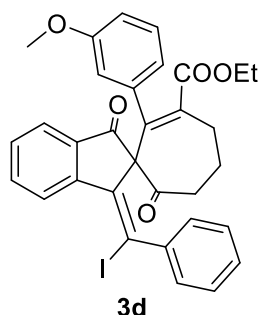

**Ethyl**                      **(E)-1'-(iodo(phenyl)methylene)-2-(3-methoxyphenyl)-3',7-dioxo-1',3'-dihydrospiro[cycloheptane-1,2'-inden]-2-ene-3-carboxylate (3d)**. Light yellow oil, purified by chromatography on silica gel (petroleum ether/ethyl acetate = 10:1); yield: 93%, 115.0 mg. <sup>1</sup>H NMR (500 MHz, CDCl<sub>3</sub>) δ 9.34 (d, *J* = 8.5 Hz, 1H), 7.70 (t, *J* = 7.5 Hz, 1H), 7.51-7.49 (m, 1H), 7.44-7.42 (m, 2H), 7.38-7.35 (m, 1H), 7.28-7.26 (m, 2H), 7.19-7.16 (m, 1H), 7.00-6.98 (m, 1H), 6.82-6.78 (m, 2H), 6.64-6.62 (m, 1H), 3.83 (q, *J* = 9.5 Hz, 2H), 3.78-3.71 (m, 1H), 3.64 (s, 3H), 2.24-2.20 (m, 1H), 2.04-1.95 (m, 1H), 1.67-1.65 (m, 1H), 1.53-1.49 (m, 1H), 0.88 (t, *J* = 7.0 Hz, 3H), 0.47-0.40 (m, 1H). <sup>13</sup>C NMR (125 MHz, CDCl<sub>3</sub>) δ 203.6, 195.0, 169.9, 158.8, 149.0, 146.1, 139.64, 139.63, 138.9, 138.2, 135.4, 134.6, 130.2, 128.8, 128.3, 128.2, 124.9, 124.8, 121.8, 114.3, 113.3, 97.8, 83.4, 60.3, 55.3, 36.9, 26.1, 24.1, 13.6. HRMS (ESI) *m/z*: [M+Na]<sup>+</sup> calcd for C<sub>32</sub>H<sub>27</sub>INaO<sub>5</sub> 641.0795, found 641.0797.

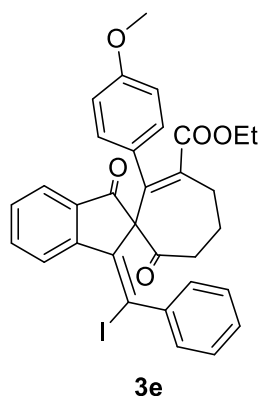

**Ethyl (E)-1'-(iodo(phenyl)methylene)-2-(4-methoxyphenyl)-3',7-dioxo-1',3'-dihydrospiro[cycloheptane-1,2'-inden]-2-ene-3-carboxylate (3e).** Light yellow solid, purified by chromatography on silica gel (petroleum ether/ethyl acetate = 10:1); yield: 88%, 108.5 mg, m.p. 214-216 °C. <sup>1</sup>H NMR (500 MHz, CDCl<sub>3</sub>) δ 9.33 (d, *J* = 8.5 Hz, 1H), 7.70 (t, *J* = 5.5 Hz, 1H), 7.50-7.49 (m, 1H), 7.43-7.41 (m, 2H), 7.37-7.34 (m, 1H), 7.28-7.26 (m, 2H), 7.19-7.16 (m, 1H), 7.13-7.11 (m, 2H), 6.63-6.61 (m, 2H), 3.84 (q, *J* = 9.5 Hz, 2H), 3.77-3.72 (m, 1H), 3.66 (s, 3H), 2.23-2.19 (m, 1H), 2.02-1.93 (m, 1H), 1.65-1.61 (m, 1H), 1.53-1.49 (m, 1H), 0.90 (t, *J* = 7.0 Hz, 3H), 0.48-0.41 (m, 1H). <sup>13</sup>C NMR (125 MHz, CDCl<sub>3</sub>) δ 203.7, 195.4, 170.0, 158.8, 149.0, 146.2, 139.5, 138.7, 138.2, 135.4, 134.6, 130.7, 130.2, 130.1, 128.4, 128.3, 128.2, 124.9, 124.8, 113.1, 97.8, 83.5, 60.3, 55.0, 37.1, 26.2, 24.1, 13.7. HRMS (ESI) *m/z*: [M+Na]<sup>+</sup> calcd for C<sub>32</sub>H<sub>27</sub>INaO<sub>5</sub> 641.0795, found 641.0802.

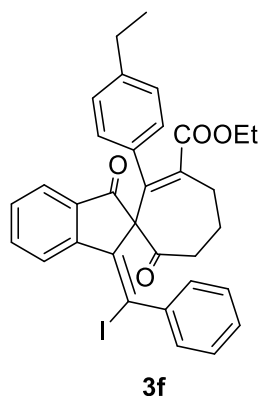

**Ethyl (E)-2-(4-ethylphenyl)-1'-(iodo(phenyl)methylene)-3',7-dioxo-1',3'-dihydrospiro[cycloheptane-1,2'-inden]-2-ene-3-carboxylate (3f).** Light yellow solid, purified by chromatography on silica gel (petroleum ether/ethyl acetate = 10:1); yield: 85%, 105.0 mg, m.p. 146-148 °C. <sup>1</sup>H NMR (500 MHz, CDCl<sub>3</sub>) δ 9.32 (d, *J* = 8.0 Hz, 1H), 7.68 (t, *J* = 8.5 Hz, 1H), 7.49-7.47 (m, 1H), 7.43-7.42 (m, 2H), 7.36-7.33 (m, 1H), 7.26-7.25 (m, 2H), 7.18-7.15 (m, 1H), 7.12-7.10 (m, 2H), 6.92-6.80 (m, 2H), 3.81 (q, *J* = 9.5 Hz, 2H), 3.75-3.69 (m, 1H), 3.46 (q, *J* = 7.5 Hz, 2H), 3.23-3.19 (m, 1H), 3.01-2.95 (m, 1H), 2.65-2.63 (m, 1H), 2.54-2.49 (m, 1H), 1.08 (t, *J* = 7.5 Hz, 3H), 0.82 (t, *J*

= 7.0 Hz, 3H), 0.49-0.42 (m, 1H).  $^{13}\text{C}$  NMR (125 MHz,  $\text{CDCl}_3$ )  $\delta$  203.8, 195.3, 170.1, 149.1, 146.2, 143.5, 139.5, 139.3, 138.0, 135.7, 135.4, 134.5, 130.0, 128.9, 128.3, 128.2, 127.2, 125.0, 124.8, 97.8, 83.5, 60.2, 37.0, 28.3, 26.2, 24.1, 15.3 13.5. HRMS (ESI)  $m/z$ :  $[\text{M}+\text{Na}]^+$  calcd for  $\text{C}_{33}\text{H}_{29}\text{INaO}_4$  639.1003, found 639.1007.

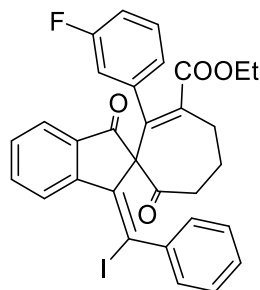

**3g**

**Ethyl (E)-2-(3-fluorophenyl)-1'-(iodo(phenyl)methylene)-3',7-dioxo-1',3'-dihydrospiro[cycloheptane-1,2'-inden]-2-ene-3-carboxylate (3g).** Light yellow solid, purified by chromatography on silica gel (petroleum ether/ethyl acetate = 10:1); yield: 88%, 106.3 mg, m.p. 162-164 °C.  $^1\text{H}$  NMR (500 MHz,  $\text{CDCl}_3$ )  $\delta$  9.34 (d,  $J$  = 8.0 Hz, 1H), 7.72 (t,  $J$  = 7.0 Hz, 1H), 7.51-7.50 (m, 1H), 7.41-7.36 (m, 3H), 7.27-7.26 (m, 2H), 7.20-7.17 (m, 1H), 7.09-7.05 (m, 1H), 7.01-6.94 (m, 2H), 6.81-6.78 (m, 1H), 3.90-3.84 (m, 1H), 3.77 (q,  $J$  = 9.5 Hz, 2H), 2.26-2.21 (m, 1H), 2.03-1.95 (m, 1H), 1.68-1.63 (m, 1H), 1.55-1.51 (m, 1H), 0.89 (t,  $J$  = 7.0 Hz, 3H), 0.48-0.41 (m, 1H).  $^{13}\text{C}$  NMR (125 MHz,  $\text{CDCl}_3$ )  $\delta$  203.2, 195.1, 169.5, 162.0 (d,  $J$  = 245.0 Hz), 149.0, 146.1, 140.4 (d,  $J$  = 245.0 Hz), 139.2, 138.9, 137.9 (d,  $J$  = 1.9 Hz), 135.2, 134.8, 130.3, 129.3 (d,  $J$  = 8.3 Hz), 128.4, 128.3, 125.1, 125.0, 124.8, 116.2 (d,  $J$  = 22.9 Hz), 114.5 (d,  $J$  = 20.9 Hz), 98.1, 83.3, 60.5, 37.0, 26.2, 24.0, 13.6.  $^{19}\text{F}$  NMR (471 MHz,  $\text{CDCl}_3$ )  $\delta$  -113.07. HRMS (ESI)  $m/z$ :  $[\text{M}+\text{Na}]^+$  calcd for  $\text{C}_{31}\text{H}_{24}\text{FINaO}_4$  629.0596, found 629.0603.

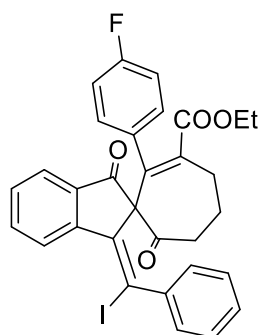

**3h**

**Ethyl (E)-2-(4-fluorophenyl)-1'-(iodo(phenyl)methylene)-3',7-dioxo-1',3'-dihydrospiro[cycloheptane-1,2'-inden]-2-ene-3-carboxylate (3h).** Light yellow solid, purified by chromatography on silica gel (petroleum ether/ethyl acetate = 10:1); yield: 85%, 102.8 mg, m.p. 223-225 °C.  $^1\text{H}$  NMR (500 MHz,  $\text{CDCl}_3$ )  $\delta$  9.35 (d,  $J$  = 8.0 Hz,

1H), 7.73 (t,  $J=7.0$  Hz, 1H), 7.53-7.51 (m, 1H), 7.44-7.38 (m, 3H), 7.30-7.28 (m, 2H), 7.22-7.19 (m, 3H), 6.83-6.80 (m, 2H), 3.84 (q,  $J=9.5$  Hz, 2H), 3.80-3.73 (m, 1H), 2.28-2.24 (m, 1H), 2.02-1.97 (m, 1H), 1.65-1.63 (m, 1H), 1.58-1.54 (m, 1H), 0.92 (t,  $J=7.0$  Hz, 3H), 0.49-0.42 (m, 1H).  $^{13}\text{C}$  NMR (125 MHz,  $\text{CDCl}_3$ )  $\delta$  203.4, 195.3, 169.7, 163.0, 162.0 (d,  $J=246.0$  Hz), 149.0, 146.1, 139.2, 138.8, 138.0, 135.3, 134.8, 134.2 (d,  $J=3.5$  Hz), 130.93, 130.87, 130.3, 128.3 (d,  $J=12.9$  Hz), 125.0, 124.8, 114.7 (d,  $J=21.0$  Hz), 98.0, 83.4, 60.4, 37.1, 26.2, 23.9, 13.7.  $^{19}\text{F}$  NMR (471 MHz,  $\text{CDCl}_3$ )  $\delta$  -114.12. HRMS (ESI)  $m/z$ :  $[\text{M}+\text{Na}]^+$  calcd for  $\text{C}_{31}\text{H}_{24}\text{FINaO}_4$  629.0596, found 629.0602.

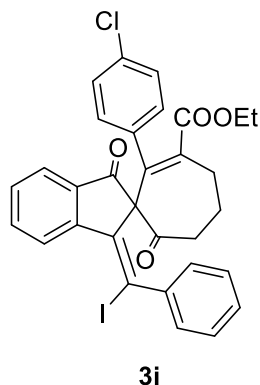

**Ethyl (E)-2-(4-chlorophenyl)-1'-(iodo(phenyl)methylene)-3',7-dioxo-1',3'-dihydrospiro[cycloheptane-1,2'-inden]-2-ene-3-carboxylate (3i).** Light yellow solid, purified by chromatography on silica gel (petroleum ether/ethyl acetate = 10:1); yield: 87%, 108.6 mg, m.p. 197-199 °C.  $^1\text{H}$  NMR (500 MHz,  $\text{CDCl}_3$ )  $\delta$  9.33 (d,  $J=8.0$  Hz, 1H), 7.72 (t,  $J=7.0$  Hz, 1H), 7.51-7.49 (m, 1H), 7.40-7.37 (m, 3H), 7.27-7.26 (m, 2H), 7.20-7.15 (m, 3H), 7.09-7.08 (m, 2H), 3.90-3.83 (m, 1H), 3.76 (q,  $J=9.5$  Hz, 2H), 2.24-2.21 (m, 1H), 2.02-1.94 (m, 1H), 1.67-1.62 (m, 1H), 1.55-1.50 (m, 1H), 0.92 (t,  $J=7.0$  Hz, 3H), 0.47-0.40 (m, 1H).  $^{13}\text{C}$  NMR (125 MHz,  $\text{CDCl}_3$ )  $\delta$  203.2, 195.2, 169.5, 148.9, 146.1, 139.2, 138.9, 138.0, 136.8, 135.2, 134.8, 133.6, 130.4, 130.3, 128.4, 128.3, 128.0, 125.0, 124.9, 98.1, 83.4, 60.5 36.9, 26.1, 24.0, 13.6. HRMS (ESI)  $m/z$ :  $[\text{M}+\text{Na}]^+$  calcd for  $\text{C}_{31}\text{H}_{24}\text{ClINaO}_4$  645.0300, found 645.0309.

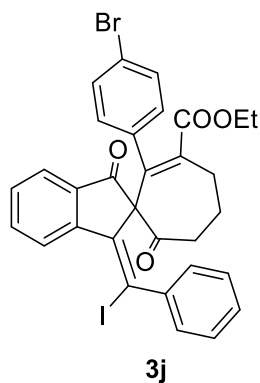

**Ethyl (E)-2-(4-bromophenyl)-1'-(iodo(phenyl)methylene)-3',7-dioxo-1',3'-dihydrospiro[cycloheptane-1,2'-inden]-2-ene-3-carboxylate (3j).** Light yellow solid, purified by chromatography on silica gel (petroleum ether/ethyl acetate = 10:1); yield: 84%, 111.8 mg, m.p. 189-191 °C. <sup>1</sup>H NMR (500 MHz, CDCl<sub>3</sub>) δ 9.33 (d, *J* = 8.5 Hz, 1H), 7.74-7.68 (m, 1H), 7.52-7.47 (m, 1H), 7.44-7.39 (m, 3H), 7.33-7.24 (m, 4H), 7.20-7.17 (m, 1H), 7.10-7.08 (m, 2H), 3.90-3.83 (m, 1H), 3.76 (q, *J* = 9.5 Hz, 2H), 2.24-2.21 (m, 1H), 2.01-1.93 (m, 1H), 1.67-1.64 (m, 1H), 1.54-1.49 (m, 1H), 0.90 (t, *J* = 7.0 Hz, 3H), 0.47-0.40 (m, 1H). <sup>13</sup>C NMR (125 MHz, CDCl<sub>3</sub>) δ 203.2, 195.2, 169.5, 149.0, 146.1, 139.2, 138.9, 138.1, 137.4, 135.2, 134.9, 131.0, 130.7, 130.3, 128.4, 128.3, 127.7, 125.1, 125.0, 121.9, 98.1, 83.4, 60.5, 36.9, 26.2, 24.0, 13.6. HRMS (ESI) *m/z*: [M+Na]<sup>+</sup> calcd for C<sub>31</sub>H<sub>24</sub>BrINaO<sub>4</sub> 688.9795, found 688.9801.

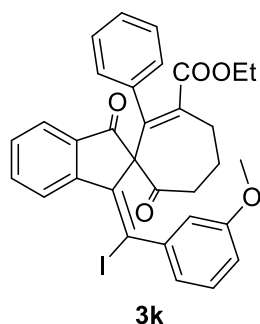

**Ethyl (E)-1'-(iodo(3-methoxyphenyl)methylene)-3',7-dioxo-2-phenyl-1',3'-dihydrospiro[cycloheptane-1,2'-inden]-2-ene-3-carboxylate (3k).** Light yellow solid, purified by chromatography on silica gel (petroleum ether/ethyl acetate = 10:1); yield: 92%, 114.0 mg, m.p. 126-128 °C. <sup>1</sup>H NMR (600 MHz, CDCl<sub>3</sub>) δ 9.31 (d, *J* = 8.4 Hz, 1H), 7.69 (t, *J* = 7.2 Hz, 1H), 7.48-7.47 (m, 1H), 7.36-7.33 (m, 1H), 7.19-7.18 (m, 3H), 7.09-7.06 (m, 3H), 7.03-7.02 (m, 1H), 6.95 (s, 1H), 6.75-6.74 (m, 1H), 3.82 (q, *J* = 9.6 Hz, 2H), 3.77 (s, 3H), 3.74-3.72 (m, 1H), 2.27-2.24 (m, 1H), 2.05-1.99 (m, 1H), 1.72-1.67 (m, 1H), 1.65-1.61 (m, 1H), 0.81 (t, *J* = 7.2 Hz, 3H), 0.69-0.64 (m, 1H). <sup>13</sup>C NMR (150 MHz, CDCl<sub>3</sub>) δ 203.8, 195.3, 169.9, 159.0, 149.1, 147.3 139.4, 138.4, 138.0, 135.4, 134.6, 130.1, 129.1, 127.7, 127.5, 125.0, 124.8, 114.8, 97.6, 83.5, 60.3, 54.4, 37.3, 26.3, 24.2, 13.5. HRMS (ESI) *m/z*: [M+Na]<sup>+</sup> calcd for C<sub>32</sub>H<sub>27</sub>INaO<sub>5</sub> 641.0795, found 641.0803.

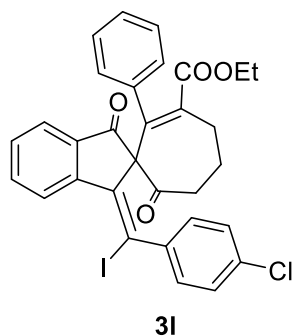

**Ethyl (E)-1'-((4-chlorophenyl)iodomethylene)-3',7-dioxo-2-phenyl-1',3'-dihydrospiro[cycloheptane-1,2'-inden]-2-ene-3-carboxylate (3l).** Light yellow oil, purified by chromatography on silica gel (petroleum ether/ethyl acetate = 10:1); yield: 82%, 101.7 mg.  $^1\text{H}$  NMR (500 MHz,  $\text{CDCl}_3$ )  $\delta$  9.30 (d,  $J = 8.5$  Hz, 1H), 7.69 (t,  $J = 7.0$  Hz, 1H), 7.48-7.46 (m, 1H), 7.39-7.33 (m, 3H), 7.27-7.25 (m, 2H), 7.19-7.17 (m, 2H), 7.09-7.07 (m, 3H), 3.85 (q,  $J = 9.5$  Hz, 2H), 3.76-3.69 (m, 1H), 2.27-2.23 (m, 1H), 2.09-2.00 (m, 1H), 1.72-1.63 (m, 2H), 0.84 (t,  $J = 7.5$  Hz, 3H), 0.56-0.49 (m, 1H).  $^{13}\text{C}$  NMR (125 MHz,  $\text{CDCl}_3$ )  $\delta$  203.5, 194.9, 169.7, 148.7, 144.5, 140.0, 139.2, 138.14, 138.07, 135.3, 134.6, 134.2, 130.3, 130.1, 128.9, 128.3, 127.8, 127.6, 124.9, 124.8, 95.9, 83.4, 60.4, 36.9, 26.2, 24.1, 13.5. HRMS (ESI)  $m/z$ :  $[\text{M}+\text{Na}]^+$  calcd for  $\text{C}_{31}\text{H}_{24}\text{ClINaO}_4$  645.0300, found 645.0306.

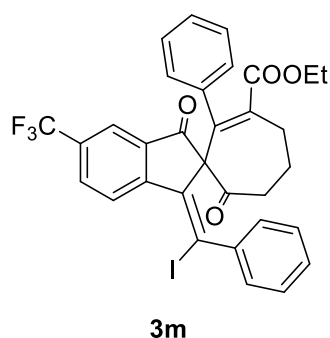

**Ethyl (E)-2-(3-fluorophenyl)-1'-(iodo(phenyl)methylene)-3',7-dioxo-1',3'-dihydrospiro[cycloheptane-1,2'-inden]-2-ene-3-carboxylate (3m).** Light yellow solid, purified by chromatography on silica gel (petroleum ether/ethyl acetate = 10:1); yield: 97%, 126.0 mg, m.p. 190-192 °C.  $^1\text{H}$  NMR (500 MHz,  $\text{CDCl}_3$ )  $\delta$  9.48 (d,  $J = 8.5$  Hz, 1H), 7.91 (d,  $J = 8.5$  Hz, 1H), 7.73 (s, 1H), 7.43-7.42 (m, 2H), 7.29-7.26 (m, 2H), 7.22-7.19 (m, 3H), 7.11-7.10 (m, 3H), 3.82 (q,  $J = 9.5$  Hz, 2H), 3.75-3.67 (m, 1H), 2.25-2.21 (m, 1H), 2.04-1.96 (m, 1H), 1.64-1.63 (m, 1H), 1.57-1.54 (m, 1H), 0.83 (t,  $J = 7.0$  Hz, 3H), 0.50-0.43 (m, 1H).  $^{13}\text{C}$  NMR (125 MHz,  $\text{CDCl}_3$ )  $\delta$  203.0, 194.5, 169.7, 151.6, 145.8, 138.8, 138.6, 138.5, 138.1, 135.5, 132.2 (q, 33.6 Hz), 130.9 (q, 3.6 Hz), 129.0, 128.6, 128.3, 127.9, 127.8, 125.6, 123.1 (q, 270.0 Hz), 121.8 (q, 4.1 Hz), 101.2, 83.8, 60.4, 37.0, 26.2, 23.9, 13.5.  $^{19}\text{F}$  NMR (471 MHz,  $\text{CDCl}_3$ )  $\delta$  -63.03. HRMS (ESI)  $m/z$ :  $[\text{M}+\text{Na}]^+$  calcd for  $\text{C}_{32}\text{H}_{24}\text{F}_3\text{INaO}_4$  679.0564, found 679.0565.

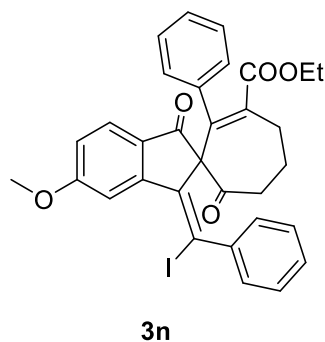

**Ethyl (E)-3'-(iodo(phenyl)methylene)-5'-methoxy-1',7-dioxo-2-phenyl-1',3'-dihydrospiro[cycloheptane-1,2'-inden]-2-ene-3-carboxylate (3n).** Light yellow solid, purified by chromatography on silica gel (petroleum ether/ethyl acetate = 10:1); yield: 84%, 104.2 mg, m.p. 178-180 °C. <sup>1</sup>H NMR (500 MHz, CDCl<sub>3</sub>) δ 8.81 (d, *J* = 2.5 Hz, 1H), 7.44-7.40 (m, 3H), 7.28-7.26 (m, 2H), 7.22-7.16 (m, 3H), 7.12-7.08 (m, 3H), 6.91-6.89 (m, 1H), 3.94 (s, 3H), 3.83 (q, *J* = 9.5 Hz, 2H), 3.72-3.66 (m, 1H), 2.25-2.21 (m, 1H), 2.02-1.94 (m, 1H), 1.65-1.62 (m, 1H), 1.53-1.48 (m, 1H), 0.83 (t, *J* = 7.0 Hz, 3H), 0.45-0.38 (m, 1H). <sup>13</sup>C NMR (125 MHz, CDCl<sub>3</sub>) δ 204.2, 193.0, 169.9, 164.9, 151.3, 146.2, 139.4, 139.1, 138.4, 138.1, 129.0, 128.8, 128.3, 128.2, 127.7, 127.5, 126.4, 118.5, 108.1, 98.2, 83.6, 60.3, 55.9, 37.1, 26.1, 24.1, 13.5. HRMS (ESI) *m/z*: [M+Na]<sup>+</sup> calcd for C<sub>32</sub>H<sub>27</sub>INaO<sub>5</sub> 641.0795, found 641.0798.

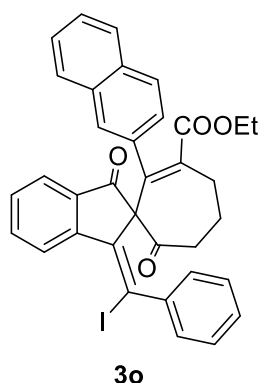

**Ethyl (E)-1'-(iodo(phenyl)methylene)-2-(naphthalen-2-yl)-3',7-dioxo-1',3'-dihydrospiro[cycloheptane-1,2'-inden]-2-ene-3-carboxylate (3o).** Light yellow oil, purified by chromatography on silica gel (petroleum ether/ethyl acetate = 10:1); yield: 93%, 119.1 mg. <sup>1</sup>H NMR (500 MHz, CDCl<sub>3</sub>) δ 9.31 (d, *J* = 8.5 Hz, 1H), 7.70-7.26 (m, 4H), 7.59-7.57 (m, 1H), 7.50-7.48 (m, 2H), 7.38-7.36 (m, 4H), 7.26-7.24 (m, 3H), 7.21-7.18 (m, 1H), 3.87 (q, *J* = 10.0 Hz, 1H), 3.79-3.72 (m, 1H), 3.63-3.56 (m, 1H), 2.28-2.24 (m, 1H), 2.08-2.00 (m, 1H), 1.71-1.67 (m, 1H), 1.59-1.55 (m, 1H), 0.65 (t, *J* = 7.0 Hz, 3H), 0.55-0.48 (m, 1H). <sup>13</sup>C NMR (125 MHz, CDCl<sub>3</sub>) δ 203.7, 195.2, 169.9, 149.1, 146.2, 139.7, 139.2, 138.8, 136.0, 135.3, 134.6, 132.7, 132.4, 130.1, 128.4, 128.3, 128.2, 127.30, 127.27, 127.1, 126.0, 125.9, 125.0, 124.9, 98.0, 83.7, 60.3, 37.0, 26.3, 24.2, 13.4. HRMS (ESI) *m/z*: [M+Na]<sup>+</sup> calcd for C<sub>35</sub>H<sub>27</sub>INaO<sub>4</sub> 661.0846, found 661.0857.

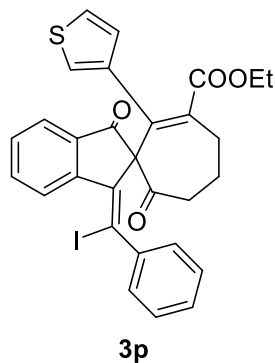

**Ethyl** (E)-1'-(iodo(phenyl)methylene)-3',7-dioxo-2-(thiophen-3-yl)-1',3'-dihydrospiro[cycloheptane-1,2'-inden]-2-ene-3-carboxylate (**3p**). Light yellow solid, purified by chromatography on silica gel (petroleum ether/ethyl acetate = 10:1); yield: 77%, 91.5 mg, m.p. 218-220 °C. <sup>1</sup>H NMR (600 MHz, CDCl<sub>3</sub>) δ 9.31 (d, *J* = 8.4 Hz, 1H), 7.72 (d, *J* = 7.8 Hz, 1H), 7.55-7.54 (m, 1H), 7.41-7.38 (m, 3H), 7.28-7.26 (m, 2H), 7.19-7.17 (m, 1H), 7.04 (s, 1H), 6.91 (s, 1H), 3.93-3.88 (m, 1H), 3.77 (q, *J* = 10.0 Hz, 2H), 2.21-2.18 (m, 1H), 2.00-1.93 (m, 1H), 1.63-1.55 (m, 2H), 0.96 (t, *J* = 7.2 Hz, 3H), 0.57-0.51 (m, 1H). <sup>13</sup>C NMR (150 MHz, CDCl<sub>3</sub>) δ 203.5, 195.3, 169.9, 149.1, 145.9, 139.7, 138.3, 138.0, 135.4, 134.6, 134.4, 130.2, 128.7, 128.4, 128.3, 125.0, 124.8, 124.6, 123.7, 97.8, 83.4, 60.5, 37.1, 26.5, 23.6, 13.7. HRMS (ESI) *m/z*: [M+Na]<sup>+</sup> calcd for C<sub>29</sub>H<sub>23</sub>INaO<sub>4</sub>S 617.0254, found 617.0264.

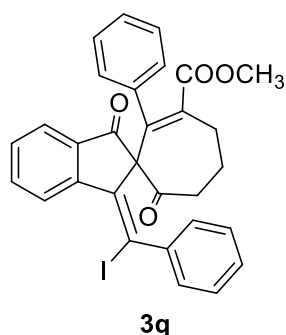

**Methyl** (E)-1'-(iodo(phenyl)methylene)-3',7-dioxo-2-phenyl-1',3'-dihydrospiro[cycloheptane-1,2'-inden]-2-ene-3-carboxylate (**3q**). Light yellow solid, purified by chromatography on silica gel (petroleum ether/ethyl acetate = 10:1); yield: 87%, 99.5 mg, m.p. 197-199 °C. <sup>1</sup>H NMR (500 MHz, CDCl<sub>3</sub>) δ 9.33 (d, *J* = 8.5 Hz, 1H), 7.68 (t, *J* = 10.0 Hz, 1H), 7.47-7.42 (m, 3H), 7.35-7.32 (m, 1H), 7.27-7.26 (m, 2H), 7.20-7.19 (m, 3H), 7.10-7.06 (m, 3H), 3.81 (q, *J* = 9.5 Hz, 1H), 3.30 (s, 3H), 2.25-2.21 (m, 1H), 2.03-1.94 (m, 1H), 1.65-1.63 (m, 1H), 1.54-1.50 (m, 1H), 0.48-0.41 (m, 1H). <sup>13</sup>C NMR (125 MHz, CDCl<sub>3</sub>) δ 203.5, 195.2, 170.2, 149.0, 146.1, 139.6, 139.3, 138.2, 138.0, 135.3, 134.6, 130.1, 128.8, 128.3, 128.2, 127.8, 127.6, 124.9, 124.7, 98.0, 83.3, 51.3, 37.1, 26.1, 24.0. HRMS (ESI) *m/z*: [M+Na]<sup>+</sup> calcd for C<sub>30</sub>H<sub>23</sub>INaO<sub>4</sub> 597.0533, found 597.0541.

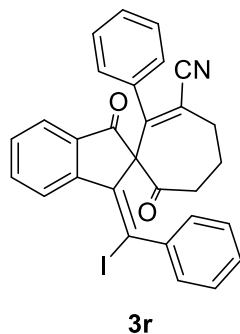



**(E)-1'-(iodo(phenyl)methylene)-3',7-dioxo-2-phenyl-1',3'-dihydrospiro[cycloheptane-1,2'-inden]-2-ene-3-carbonitrile (3r)**. Light yellow solid, purified by chromatography on silica gel (petroleum ether/ethyl acetate = 10:1); yield: 84%, 91.2 mg, m.p. 251-253 °C. <sup>1</sup>H NMR (500 MHz, CDCl<sub>3</sub>) δ 9.32 (d, *J* = 8.5 Hz, 1H), 7.72 (t, *J* = 7.5 Hz, 1H), 7.51-7.49 (m, 1H), 7.40-7.34 (m, 7H), 7.26-7.25 (m, 1H), 7.22-7.21 (m, 3H), 3.69 (q, *J* = 10.0 Hz, 1H), 2.28-2.24 (m, 1H), 1.95-1.92 (m, 1H), 1.66-1.64 (m, 2H), 0.69-0.62 (m, 1H). <sup>13</sup>C NMR (125 MHz, CDCl<sub>3</sub>) δ 202.0, 194.1, 153.6, 148.9, 145.9, 138.6, 136.8, 135.0, 134.9, 130.4, 129.2, 128.84, 128.82, 128.6, 128.5, 125.2, 125.0, 119.0, 118.6, 98.1, 83.4, 36.6, 27.4, 23.0. HRMS (ESI) *m/z*: [M+Na]<sup>+</sup> calcd for C<sub>29</sub>H<sub>20</sub>INNaO<sub>2</sub> 564.0431, found 564.0440.

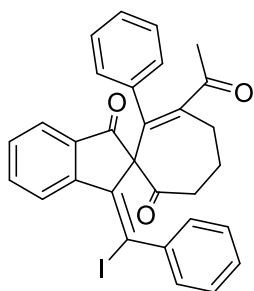

**3s**

**(E)-3-acetyl-1'-(iodo(phenyl)methylene)-2-phenylspiro[cycloheptane-1,2'-inden]-2-ene-3',7(1'H)-dione (3s)**. Light yellow solid, purified by chromatography on silica gel (petroleum ether/ethyl acetate = 10:1); yield: 84%, 94.2 mg, m.p. 200-202 °C. <sup>1</sup>H NMR (500 MHz, CDCl<sub>3</sub>) δ 9.34 (d, *J* = 8.0 Hz, 1H), 7.70 (t, *J* = 8.5 Hz, 1H), 7.49-7.44 (m, 3H), 7.37-7.34 (m, 1H), 7.32-7.28 (m, 2H), 7.22-7.20 (m, 3H), 7.13-7.12 (m, 3H), 3.82 (q, *J* = 10.0 Hz, 1H), 2.25-2.21 (m, 1H), 2.02-1.98 (m, 1H), 1.76-1.70 (m, 1H), 1.61 (s, 3H), 1.41-1.38 (m, 1H), 0.49-0.42 (m, 1H). <sup>13</sup>C NMR (125 MHz, CDCl<sub>3</sub>) δ 206.3, 203.9, 195.3, 149.1, 146.6, 146.3, 139.7, 137.6, 136.6, 135.3, 134.6, 130.2, 129.6, 128.5, 128.3, 128.2, 125.1, 124.8, 97.5, 83.8, 36.9, 29.9, 26.1, 24.8. HRMS (ESI) *m/z*: [M+Na]<sup>+</sup> calcd for C<sub>30</sub>H<sub>23</sub>INaO<sub>3</sub> 581.0584, found 581.0580.

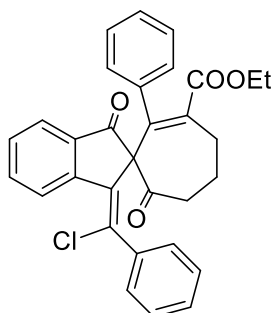

**3t**

**Ethyl (E)-1'-(chloro(phenyl)methylene)-3',7-dioxo-2-phenyl-1',3'-dihydrospiro[cycloheptane-1,2'-inden]-2-ene-3-carboxylate (3t)**. Light yellow oil, purified by chromatography on silica gel (petroleum ether/ethyl acetate = 10:1); yield:

81%, 80.1 mg. <sup>1</sup>H NMR (500 MHz, CDCl<sub>3</sub>) 7.56-7.51 (m, 3H), 7.36-7.33 (m, 6H), 7.19-7.12 (m, 5H), 3.83 (q, *J* = 7.0 Hz, 2H), 3.27-3.22 (m, 1H), 3.10-3.05 (m, 1H), 2.75-2.70 (m, 1H), 2.55-2.50 (m, 1H), 2.27-2.19 (m, 2H), 0.79 (q, *J* = 7.0 Hz, 3H). <sup>13</sup>C NMR (125 MHz, CDCl<sub>3</sub>) δ 201.5, 195.5, 169.1, 141.7, 138.4, 137.3, 136.2, 133.5, 131.8, 130.5, 129.8, 128.5, 128.4, 128.2, 128.0, 127.7, 126.4, 122.9, 122.0, 93.4, 87.0, 84.6, 60.8, 36.7, 27.1, 24.7, 13.4. HRMS (ESI) *m/z*: [M+Na]<sup>+</sup> calcd for C<sub>31</sub>H<sub>25</sub>ClNaO<sub>4</sub> 519.1334, found 519.1342.

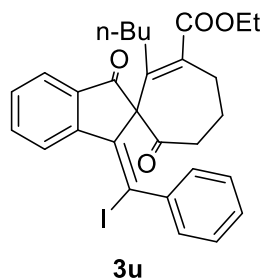

**Ethyl** (E)-2-butyl-1'-(iodo(phenyl)methylene)-3',7-dioxo-1',3'-dihydrospiro[cycloheptane-1,2'-inden]-2-ene-3-carboxylate (**3u**). Light yellow oil, purified by chromatography on silica gel (petroleum ether/ethyl acetate = 10:1); yield: 83%, 94.3 mg. <sup>1</sup>H NMR (600 MHz, CDCl<sub>3</sub>) 9.36 (d, *J* = 8.4 Hz, 1H), 7.83-7.80 (m, 2H), 7.56-7.53 (m, 1H), 7.27-7.23 (m, 4H), 7.17-7.14 (m, 1H), 4.20-4.11 (m, 2H), 3.57-3.52 (m, 1H), 2.42-3.37 (m, 1H), 2.10-2.07 (m, 1H), 1.86-1.80 (m, 1H), 1.67-1.64 (m, 1H), 1.56-1.52 (m, 1H), 1.42-1.38 (m, 1H), 1.34-1.26 (m, 4H), 1.12-1.05 (m, 2H), 0.71 (q, *J* = 7.2 Hz, 3H), 0.57-0.51 (m, 1H). <sup>13</sup>C NMR (150 MHz, CDCl<sub>3</sub>) δ 204.5, 196.3, 169.5, 149.7, 146.0, 141.4, 139.6, 135.8, 134.9, 134.2, 130.3, 128.2, 128.1, 125.4, 124.9, 97.6, 85.4, 60.4, 36.7, 32.6, 32.5, 26.5, 23.6, 23.4, 14.1, 13.5. HRMS (ESI) *m/z*: [M+Na]<sup>+</sup> calcd for C<sub>29</sub>H<sub>29</sub>INaO<sub>4</sub> 591.1003, found 591.1013.

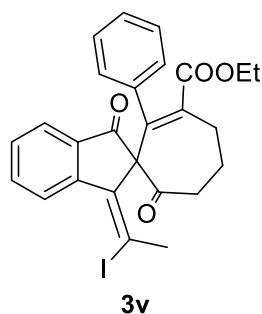

**Ethyl** (E)-1'-(1-iodoethylidene)-3',7-dioxo-2-phenyl-1',3'-dihydrospiro[cycloheptane-1,2'-inden]-2-ene-3-carboxylate (**3v**). Light yellow oil, purified by chromatography on silica gel (petroleum ether/ethyl acetate = 10:1); yield: 74%, 77.6 mg. <sup>1</sup>H NMR (600 MHz, CDCl<sub>3</sub>) 8.98 (d, *J* = 7.8 Hz, 1H), 7.62-7.61 (m, 1H),

7.58-7.55 (m, 1H), 7.34-7.31 (m, 1H), 7.03-6.99 (m, 3H), 6.92-6.91 (m, 2H), 3.75 (q,  $J = 7.2$  Hz, 2H), 3.71-3.66 (m, 1H), 2.94 (s, 3H), 2.81-2.77 (m, 1H), 2.69-2.65 (m, 1H), 2.61-2.55 (m, 1H), 2.53-2.47 (m, 1H), 2.15-2.10 (m, 1H), 0.75 (q,  $J = 7.2$  Hz, 3H).  $^{13}\text{C}$  NMR (150 MHz,  $\text{CDCl}_3$ )  $\delta$  202.6, 196.4, 170.1, 149.4, 138.5, 138.3, 138.2, 137.7, 135.6, 134.6, 129.3, 129.2, 127.5, 127.2, 124.5, 124.2, 97.5, 82.9, 60.7, 39.5, 36.9, 29.6, 22.9, 13.4. HRMS (ESI)  $m/z$ :  $[\text{M}+\text{Na}]^+$  calcd for  $\text{C}_{26}\text{H}_{23}\text{INaO}_4$  549.0533, found 549.0536.

### 5. 1.0 mmol scale reaction for the preparation of **3a**

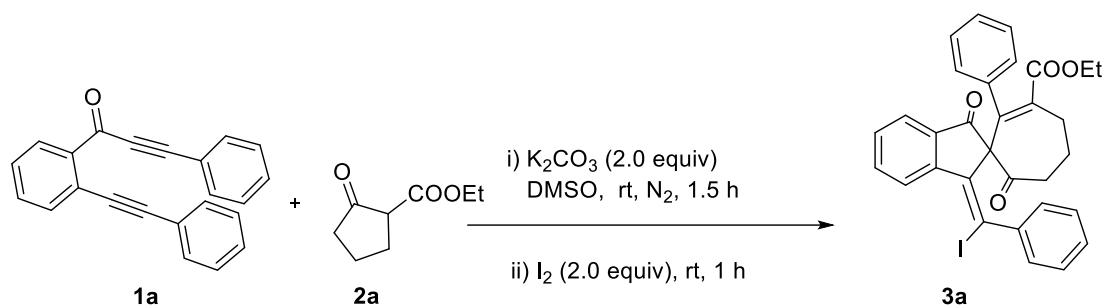

In a schlenk tube, aryl-fused 1,6-diyne-3-one **1a** (1.0 mmol, 306.4 mg), ethyl 2-oxocyclohexanecarboxylate **2a** (2.0 mmol, 2.0 equiv, 300  $\mu\text{L}$ ),  $\text{K}_2\text{CO}_3$  (2.0 mmol, 2.0 equiv, 276.4 mg) and DMSO (10.0 mL) were stirred under  $\text{N}_2$  at room temperature. After 1.5 h,  $\text{I}_2$  (2.0 mmol, 2.0 equiv, 507.6 mg) was added and stirred for 1 h. After the completion of the reaction monitored by TLC, the reaction mixture was quenched with aqueous sat.  $\text{Na}_2\text{S}_2\text{O}_3$  solution (5 mL). Then the filtrate was extracted with ethyl acetate (5 mL  $\times$  3). The organic layers were combined, washed with brine, dried over anhydrous  $\text{Na}_2\text{SO}_4$ , filtered and concentrated under reduced pressure. Purification by column chromatography with petroleum ether/ethyl acetate = 10:1 as the eluent to afford **3a** (Light yellow solid, 529.8 mg, 90%).

### 6. Synthetic transformation of compound **3a**

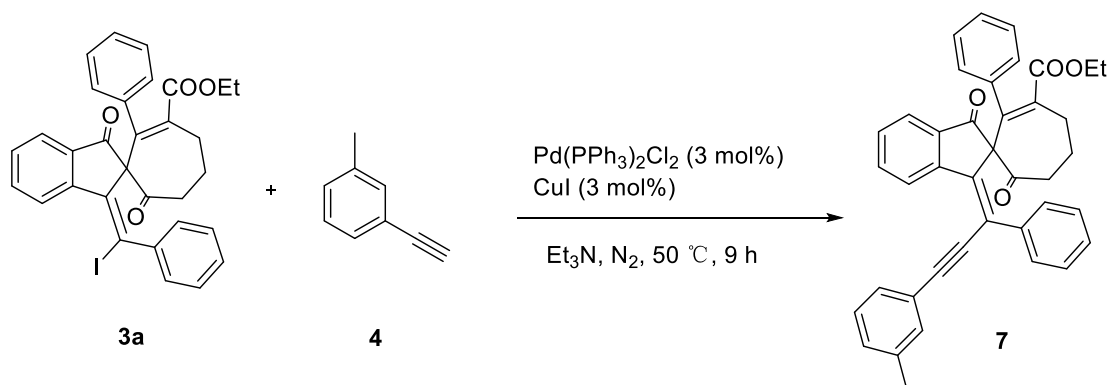

In a schlenk tube, **3a** (0.2 mmol, 117.8 mg), Pd(PPh<sub>3</sub>)<sub>2</sub>Cl<sub>2</sub> (0.006 mmol, 3 mol%, 4.5 mg), CuI (0.006 mmol, 3 mol%, 1.7 mg) and NEt<sub>3</sub> (2 mL) were added under N<sub>2</sub> at room temperature. Then 1-ethynyl-3-methylbenzene **4** (0.3 mmol, 0.15 equiv, 39 μL) was added dropwise and the mixture was stirred at 50 °C in an oil bath for 9 h. After the completion of the reaction monitored by TLC, the reaction mixture was quenched with aqueous sat. NH<sub>4</sub>Cl solution (2 mL). Then the filtrate was extracted with ethyl acetate (3 mL × 3). The organic layers were combined, washed with brine, dried over anhydrous Na<sub>2</sub>SO<sub>4</sub>, filtered and concentrated under reduced pressure. Purification by column chromatography with petroleum ether/ethyl acetate = 15:1 as the eluent to afford **7** (Yellow oil, 97.7 mg, 85%). <sup>1</sup>H NMR (500 MHz, CDCl<sub>3</sub>) δ 9.18 (d, *J* = 6.5 Hz, 1H), δ 7.65 (d, *J* = 7.0 Hz, 1H), 7.54-7.53 (m, 2H), 7.47-7.45 (m, 1H), 7.32-7.25 (m, 7H), 7.24-7.22 (m, 2H), 7.18-7.17 (m, 1H), 7.07-7.06 (m, 3H), 3.87 (q, *J* = 10.0 Hz, 2H), 3.74-3.67 (m, 1H), 2.35 (s, 3H), 2.29-2.26 (m, 1H), 2.07-1.99 (m, 1H), 1.74-1.69 (m, 1H), 1.56-1.52 (m, 1H), 0.83 (q, *J* = 7.5 Hz, 3H), 0.54-0.47 (m, 1H). <sup>13</sup>C NMR (125 MHz, CDCl<sub>3</sub>) δ 204.0, 196.2, 170.0, 149.7, 139.8, 139.7, 138.7, 138.4, 138.2, 137.7, 135.5, 132.0, 129.8, 129.6, 129.5, 128.9, 128.6, 128.4, 127.9, 127.6, 127.4, 125.2, 124.4, 124.1, 122.8, 101.1, 91.5, 81.3, 60.3, 37.2, 25.9, 24.5, 21.2, 13.5. HRMS (ESI) *m/z*: [M+Na]<sup>+</sup> calcd for C<sub>40</sub>H<sub>32</sub>NaO<sub>4</sub> 599.2193, found 599.2198.

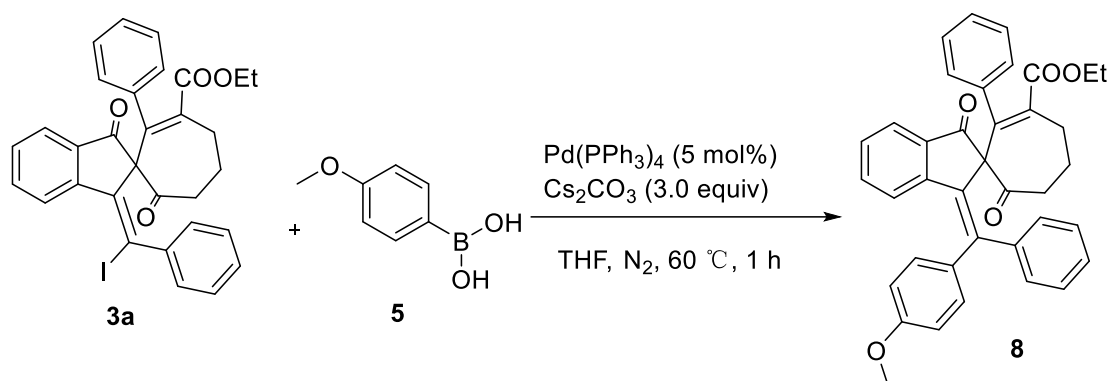

In a schlenk tube, **3a** (0.2 mmol, 117.8 mg), (4-methoxyphenyl)boronic acid **5** (0.4 mmol, 2.0 equiv, 60.8 mg), Pd(PPh<sub>3</sub>)<sub>4</sub> (0.01 mmol, 5 mol%, 11.6 mg), Cs<sub>2</sub>CO<sub>3</sub> (0.6 mmol, 3.0 equiv, 195.5 mg) and THF (2 mL) were added under N<sub>2</sub> and stirred at 60 °C in an oil bath for 1 h. After the completion of the reaction monitored by TLC, the reaction mixture was quenched with aqueous sat. NH<sub>4</sub>Cl solution (2 mL). Then the filtrate was extracted with ethyl acetate (3 mL × 3). The organic layers were combined, washed with brine, dried over anhydrous Na<sub>2</sub>SO<sub>4</sub>, filtered and concentrated under reduced pressure. Purification by column chromatography with petroleum ether/ethyl acetate = 10:1 as the eluent to afford **8** (Yellow oil, 97.8 mg, 86%). <sup>1</sup>H NMR (500 MHz, CDCl<sub>3</sub>) δ 7.43-7.33 (m, 6H), 7.29-7.24 (m, 3H), 7.20-7.06 (m, 6H), 6.94-6.89 (m, 2H),

6.69-6.67 (m, 1H), 3.91 (q,  $J = 11.5$  Hz, 1H), 3.83 (s, 3H), 3.75-3.67 (m, 2H), 2.30-2.26 (m, 1H), 2.06-1.99 (m, 1H), 1.78-1.70 (m, 1H), 1.62-1.57 (m, 1H), 0.82 (q,  $J = 7.5$  Hz, 3H), 0.71-0.64 (m, 1H).  $^{13}\text{C}$  NMR (125 MHz,  $\text{CDCl}_3$ )  $\delta$  204.9, 197.3, 170.1, 159.4, 151.2, 145.0, 142.0, 140.2, 138.8, 137.4, 135.9, 134.60, 134.5, 132.8, 130.4, 129.3, 129.2, 128.3, 128.1, 127.5, 127.4, 125.9, 124.3, 114.7, 114.6, 82.2, 60.2, 55.2, 37.3, 25.8, 24.5, 13.5. HRMS (ESI)  $m/z$ :  $[\text{M}+\text{Na}]^+$  calcd for  $\text{C}_{38}\text{H}_{32}\text{NaO}_5$  591.2142, found 519.2149.

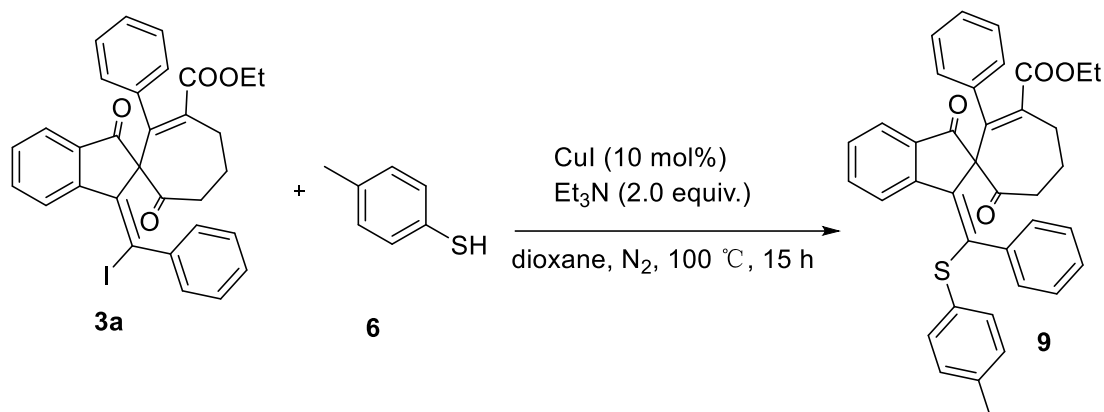

In a schlenk tube, **3a** (0.2 mmol, 117.8 mg), 4-methylbenzenethiol **6** (0.24 mmol, 1.2 equiv, 30.2 mg), CuI (0.02 mmol, 10 mol%, 4.3 mg),  $\text{NEt}_3$  (0.4 mmol, 2.0 equiv, 60  $\mu\text{L}$ ) and dioxane (2 mL) were added under  $\text{N}_2$  and stirred at 100  $^\circ\text{C}$  in an oil bath for 15 h. After the completion of the reaction monitored by TLC, the reaction mixture was quenched with aqueous sat.  $\text{NH}_4\text{Cl}$  solution (2 mL). Then the filtrate was extracted with ethyl acetate (3 mL  $\times$  3). The organic layers were combined, washed with brine, dried over anhydrous  $\text{Na}_2\text{SO}_4$ , filtered and concentrated under reduced pressure. Purification by column chromatography with petroleum ether/ethyl acetate = 20:1 as the eluent to afford **9** (Yellow oil, 68.1 mg, 58%).  $^1\text{H}$  NMR (500 MHz,  $\text{CDCl}_3$ )  $\delta$  9.11 (d,  $J = 8.0$  Hz, 1H), 7.63 (t,  $J = 8.5$  Hz, 1H), 7.47-7.46 (m, 1H), 7.26-7.21 (m, 4H), 7.15-7.05 (m, 8H), 6.972-6.966 (m, 3H), 3.89-3.85 (m, 1H), 3.82-3.78 (m, 1H), 3.72-3.65 (m, 1H), 2.24 (s, 3H), 2.22-2.20 (m, 1H), 2.00-1.92 (m, 1H), 1.62-1.61 (m, 1H), 1.46-1.42 (m, 1H), 0.82 (q,  $J = 7.0$  Hz, 3H), 0.40-0.33 (m, 1H).  $^{13}\text{C}$  NMR (125 MHz,  $\text{CDCl}_3$ )  $\delta$  204.6, 196.9, 170.0, 150.0, 142.3, 139.9, 138.6, 137.4, 137.1, 135.4, 135.3, 134.5, 131.4, 130.8, 129.2, 129.1, 128.4, 127.7, 127.6, 127.5, 127.43, 127.35, 127.24, 127.23, 124.6, 82.7, 60.2, 37.2, 25.8, 24.2, 21.1, 13.5. HRMS (ESI)  $m/z$ :  $[\text{M}+\text{Na}]^+$  calcd for  $\text{C}_{38}\text{H}_{32}\text{NaO}_4\text{S}$  607.1914, found 607.1920.

## 7. Mechanistic study

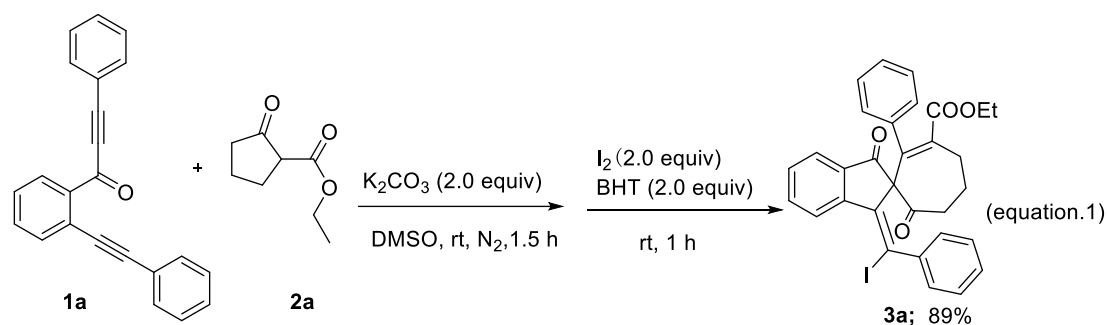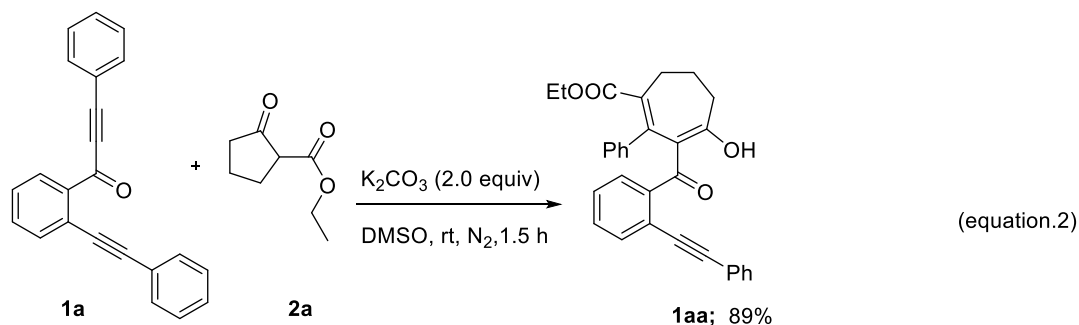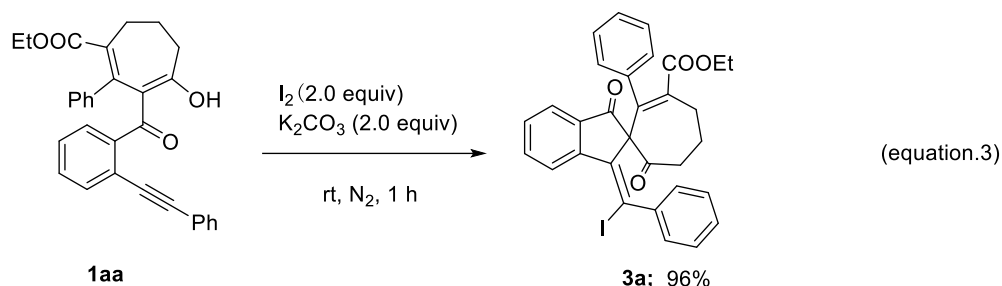

In a schlenk tube, aryl-fused 1,6-diyne-3-one **1a** (0.2 mmol, 61.2 mg), ethyl 2-oxocyclohexanecarboxylate **2a** (0.4 mmol, 2.0 equiv, 60  $\mu$ L),  $K_2CO_3$  (0.4 mmol, 2.0 equiv, 55.3 mg) and DMSO (2.0 mL) were stirred under  $N_2$  at room temperature. After 1.5 h,  $I_2$  (0.4 mmol, 2.0 equiv, 101.5 mg) and butylated hydroxytoluene (BHT) (0.4 mmol, 2.0 equiv, 88.1 mg) were added and stirred for 1 h. After the completion of the reaction monitored by TLC, the reaction mixture was quenched with aqueous sat.  $Na_2S_2O_3$  solution (2 mL). Then the filtrate was extracted with ethyl acetate (3 mL  $\times$  3). The organic layers were combined, washed with brine, dried over anhydrous  $Na_2SO_4$ , filtered and concentrated under reduced pressure. Purification by column chromatography with petroleum ether/ethyl acetate = 10:1 as the eluent to afford **3a** (Light yellow solid, 104.9 mg, 89%) (equation.1).

In a schlenk tube, aryl-fused 1,6-diyne-3-one **1a** (0.5 mmol, 154.1 mg), ethyl 2-oxocyclohexanecarboxylate **2a** (1.0 mmol, 2.0 equiv, 150  $\mu$ L),  $K_2CO_3$  (1.0 mmol, 2.0 equiv, 138.2 mg) and DMSO (5.0 mL) were stirred under  $N_2$  at room temperature for 1.5 h. After the completion of the reaction monitored by TLC, the reaction mixture was

quenched with H<sub>2</sub>O (2 mL). Then the filtrate was extracted with ethyl acetate (3 mL × 3). The organic layers were combined, washed with brine, dried over anhydrous Na<sub>2</sub>SO<sub>4</sub>, filtered and concentrated under reduced pressure. Purification by column chromatography with petroleum ether/ethyl acetate = 10:1 as the eluent to afford **1aa** (Light yellow oil, 206.2 mg, 89%) (equation.2). **1aa**: <sup>1</sup>H NMR (500 MHz, CDCl<sub>3</sub>) δ 17.1 (s, 1H), 7.52-7.50 (m, 2H), 7.36-7.35 (m, 3H), 7.21-7.19 (m, 1H), 7.11-7.08 (m, 1H), 6.99-6.88 (m, 4H), 6.78-6.72 (m, 3H), 3.86 (d, *J* = 7.0 Hz, 2H), 2.84-2.49 (m, 4H), 2.27-2.23 (m, 2H), 0.80 (t, *J* = 7.0 Hz, 3H). <sup>13</sup>C NMR (125 MHz, CDCl<sub>3</sub>) δ 197.2, 190.7, 170.1, 144.1, 140.7, 139.1, 132.1, 131.6, 131.5, 129.0, 128.4, 128.3, 128.1, 127.4, 127.1, 127.0, 126.9, 123.1, 120.6, 114.7, 93.1, 87.0, 60.4, 35.6, 31.1, 28.9, 13.4. HRMS (ESI) *m/z*: [M+Na]<sup>+</sup> calcd for C<sub>31</sub>H<sub>26</sub>NaO<sub>4</sub> 485.1723, found 485.1723.

In a schlenk tube, **1aa** (0.2 mmol, 92.4 mg), K<sub>2</sub>CO<sub>3</sub> (0.4 mmol, 2.0 equiv, 55.3 mg), I<sub>2</sub> (0.4 mmol, 2.0 equiv, 101.5 mg) and DMSO (2.0 mL) were stirred under N<sub>2</sub> at room temperature for 1.0 h, After the completion of the reaction monitored by TLC, the reaction mixture was quenched with aqueous sat. Na<sub>2</sub>S<sub>2</sub>O<sub>3</sub> solution (2 mL). Then the filtrate was extracted with ethyl acetate (3 mL × 3). The organic layers were combined, washed with brine, dried over anhydrous Na<sub>2</sub>SO<sub>4</sub>, filtered and concentrated under reduced pressure. Purification by column chromatography with petroleum ether/ethyl acetate = 10:1 as the eluent to afford **3a** (Light yellow solid, 112.8 mg, 96%) (equation.3).

## 8. NMR Copies of all the Synthesized New Starting Materials

$^1\text{H}$  NMR (500 MHz,  $\text{CD}_2\text{Cl}_2$ )

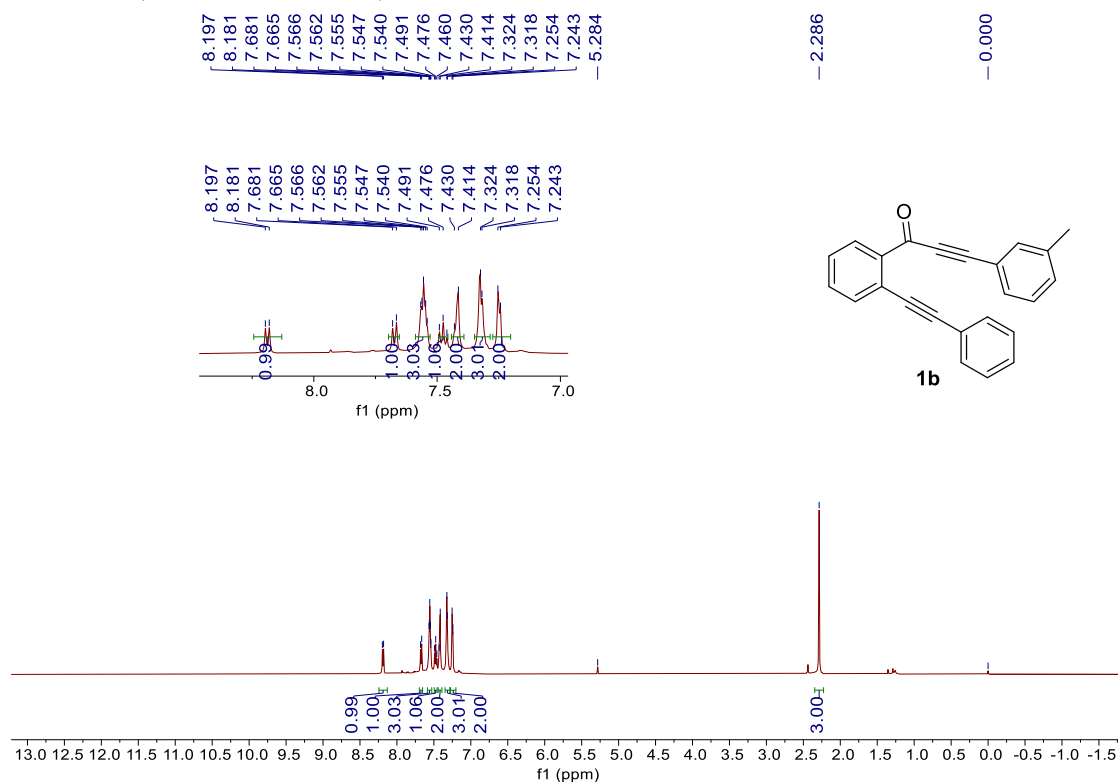

$^{13}\text{C}$  NMR (125 MHz,  $\text{CD}_2\text{Cl}_2$ )

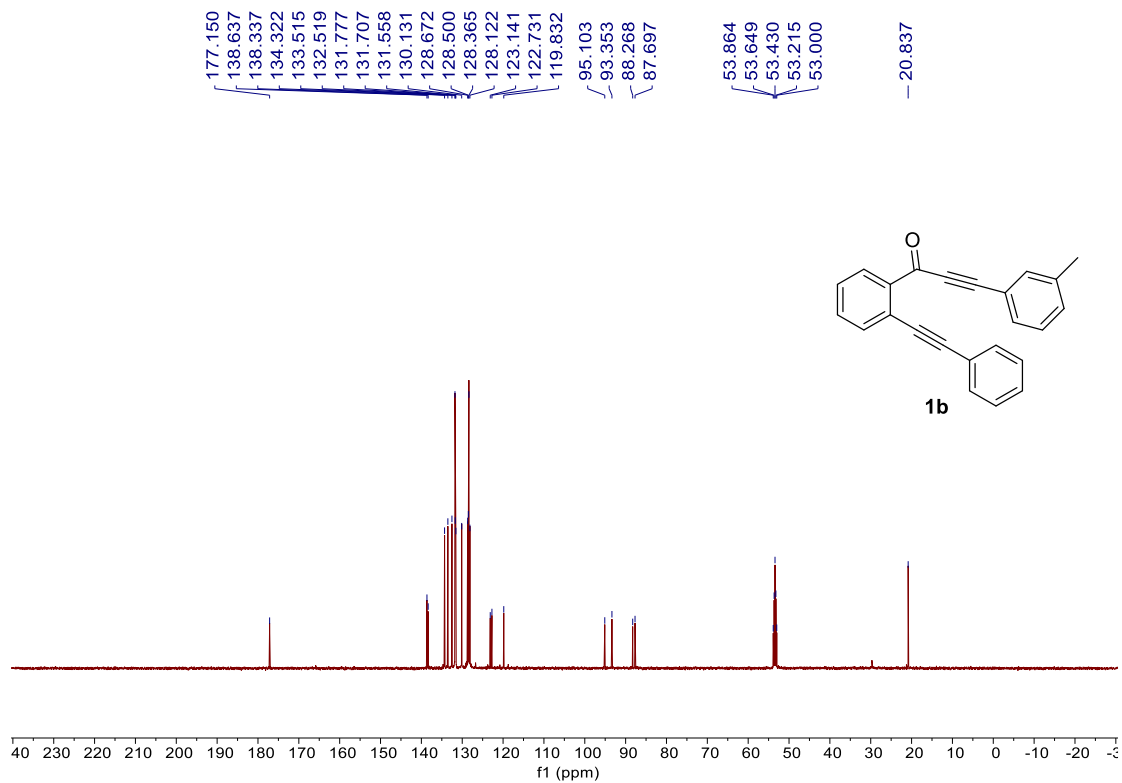



$^1\text{H}$  NMR (600 MHz, DMSO- $d_6$ )

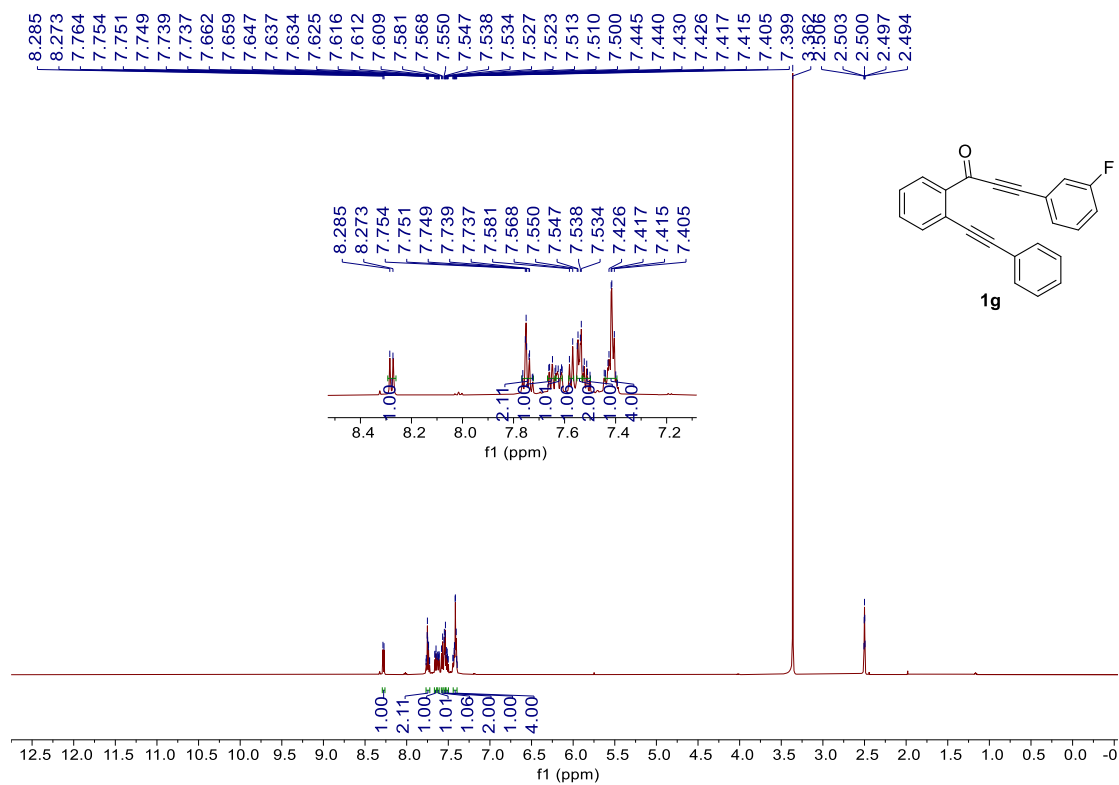

$^{13}\text{C}$  NMR (150 MHz, DMSO- $d_6$ )

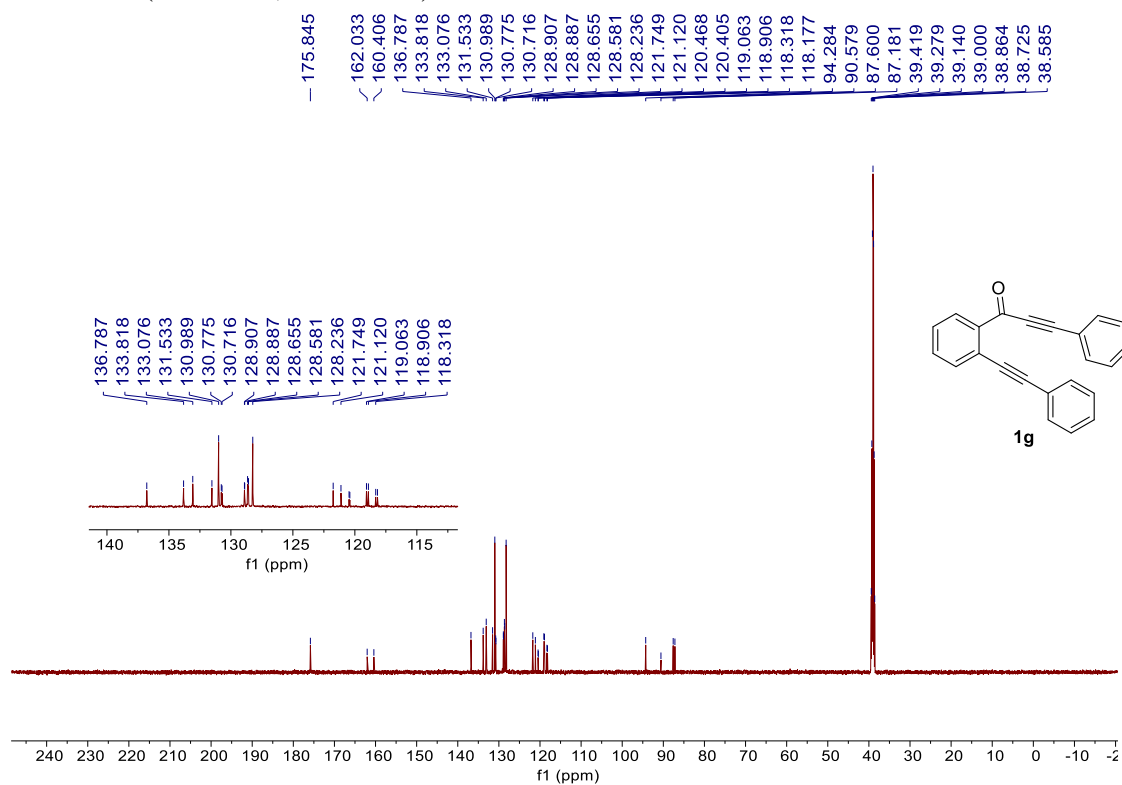

$^{19}\text{F}$  NMR (471 MHz,  $\text{CDCl}_3$ )

— -111.823

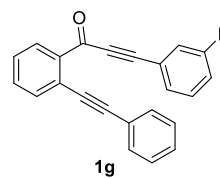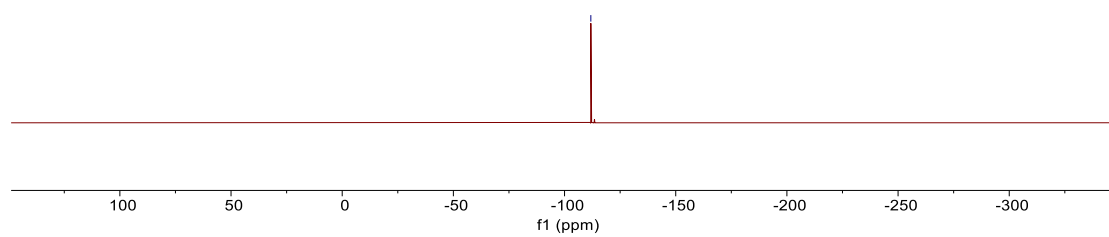

$^1\text{H}$  NMR (500 MHz,  $\text{CD}_2\text{Cl}_2$ )

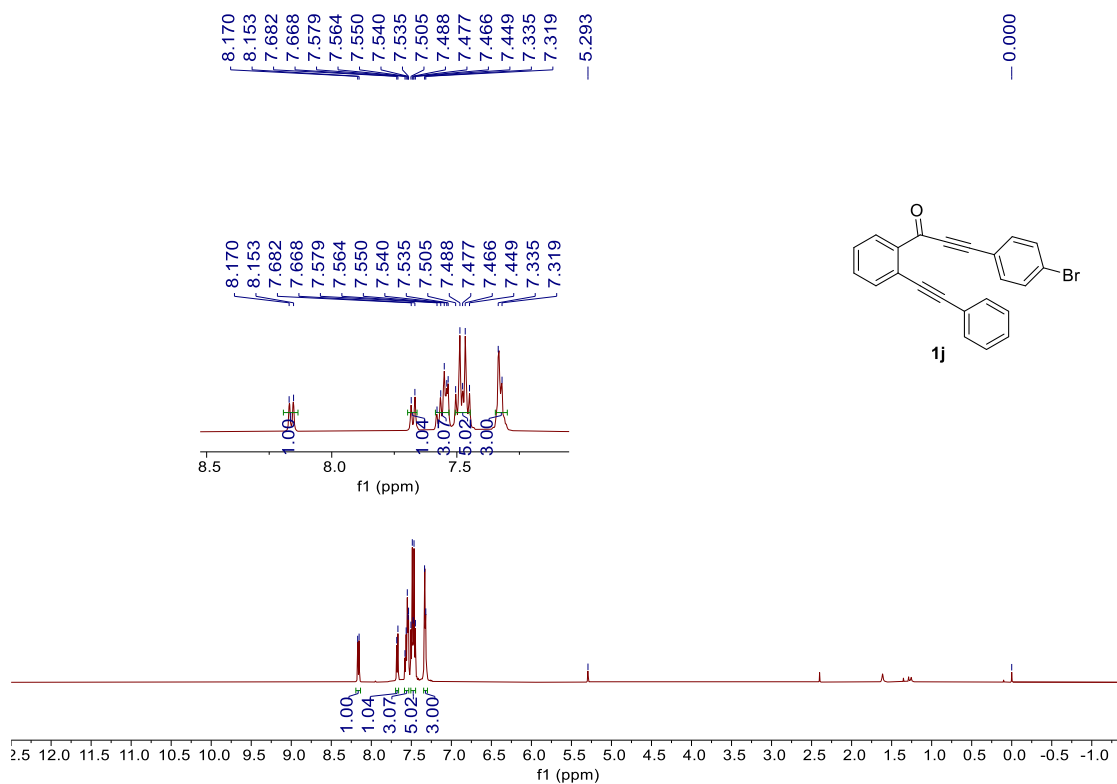

$^{13}\text{C}$  NMR (125 MHz,  $\text{CD}_2\text{Cl}_2$ )

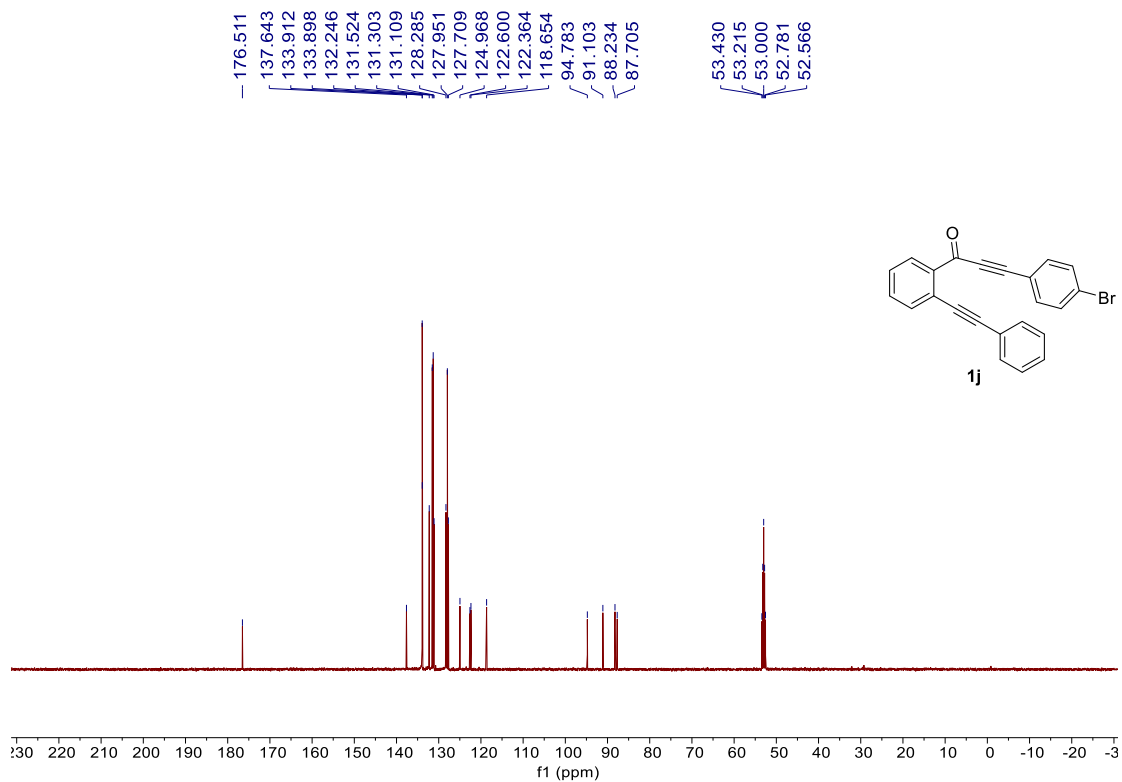

$^1\text{H}$  NMR (500 MHz,  $\text{CD}_2\text{Cl}_2$ )

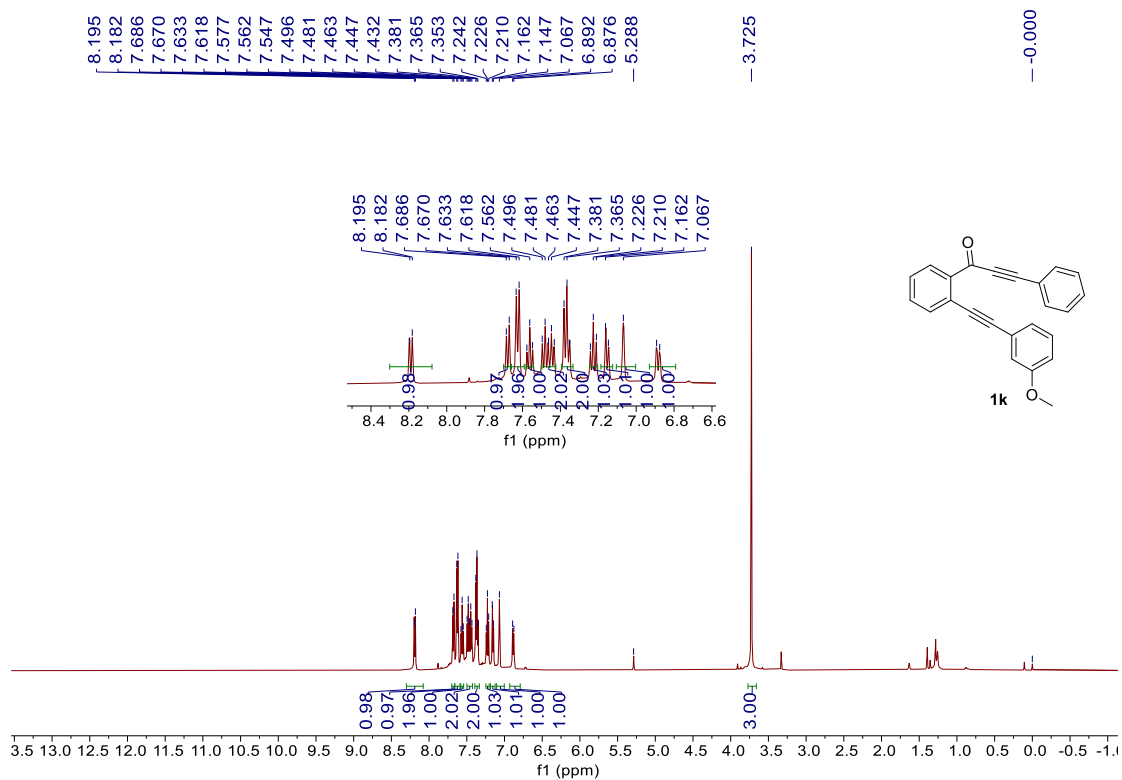

$^{13}\text{C}$  NMR (125 MHz,  $\text{CD}_2\text{Cl}_2$ )

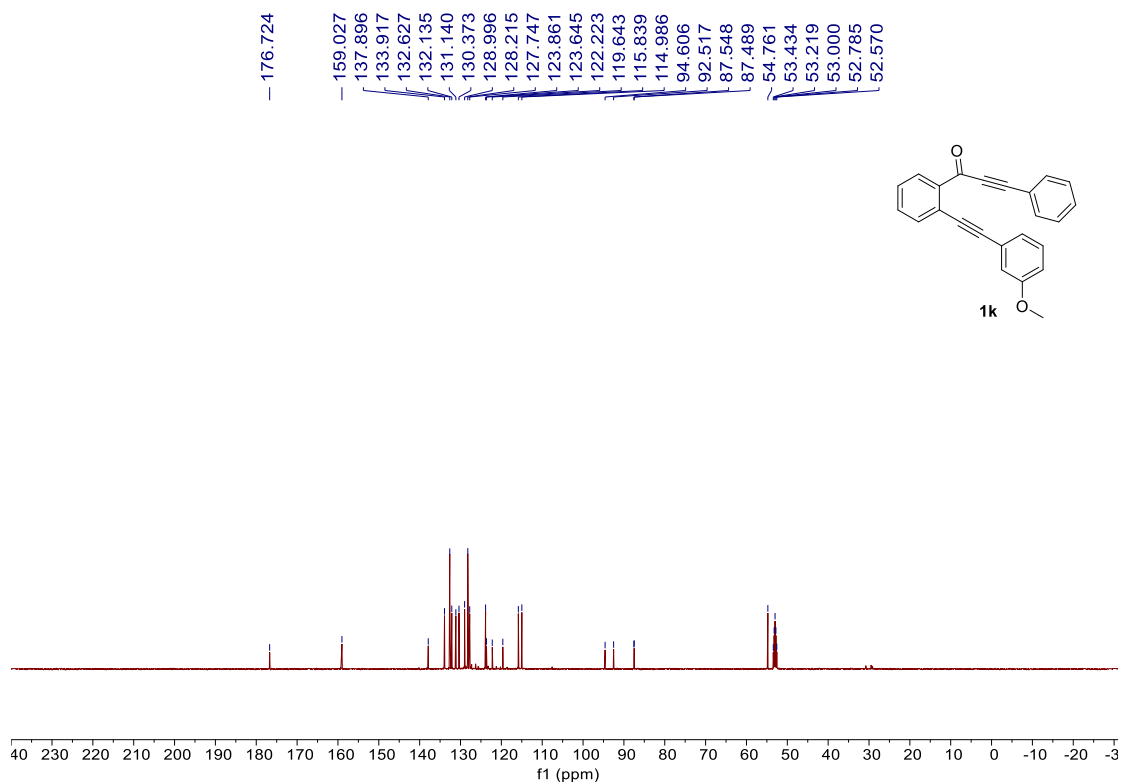

$^1\text{H}$  NMR (500 MHz,  $\text{CDCl}_3$ )

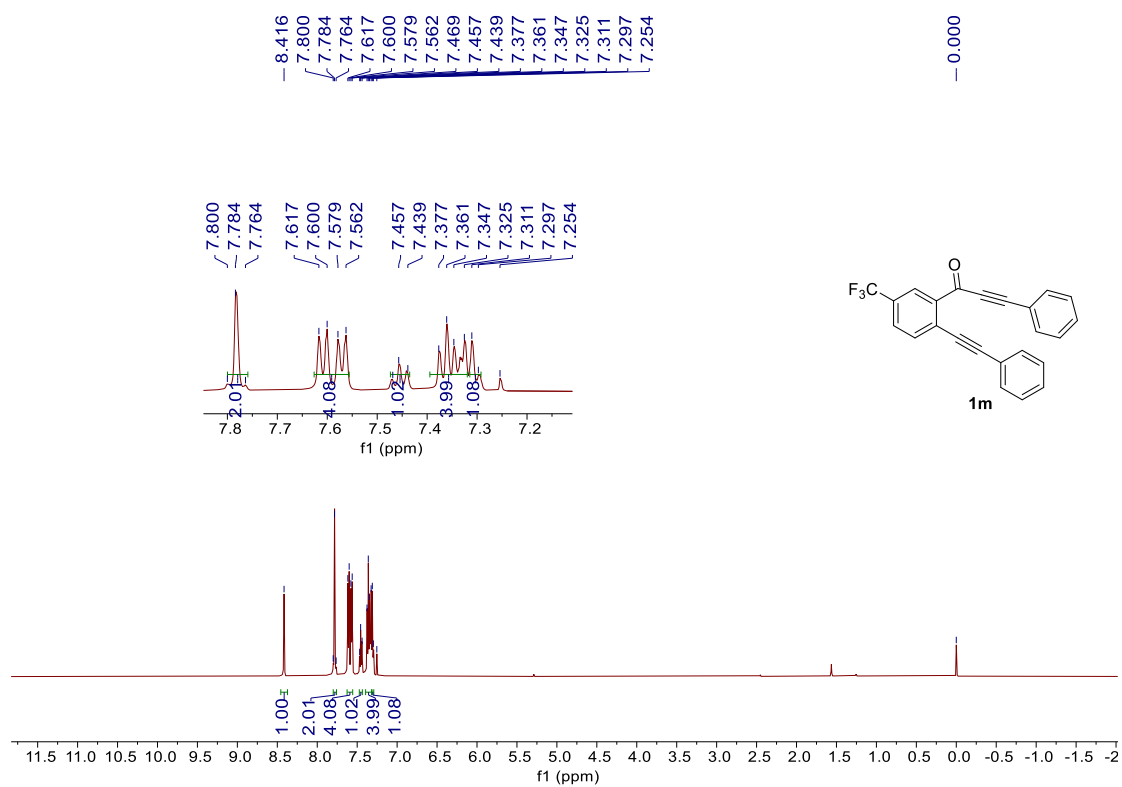

$^{13}\text{C}$  NMR (125 MHz,  $\text{CDCl}_3$ )

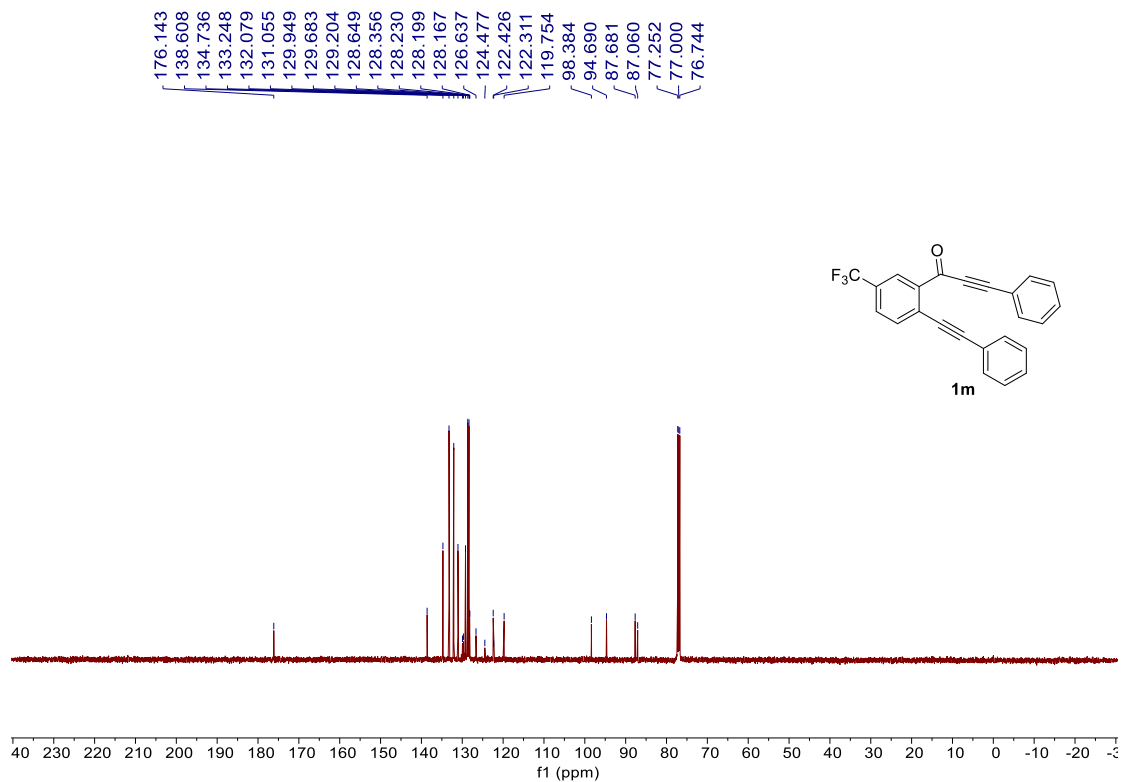

$^{19}\text{F}$  NMR (471 MHz,  $\text{CDCl}_3$ )

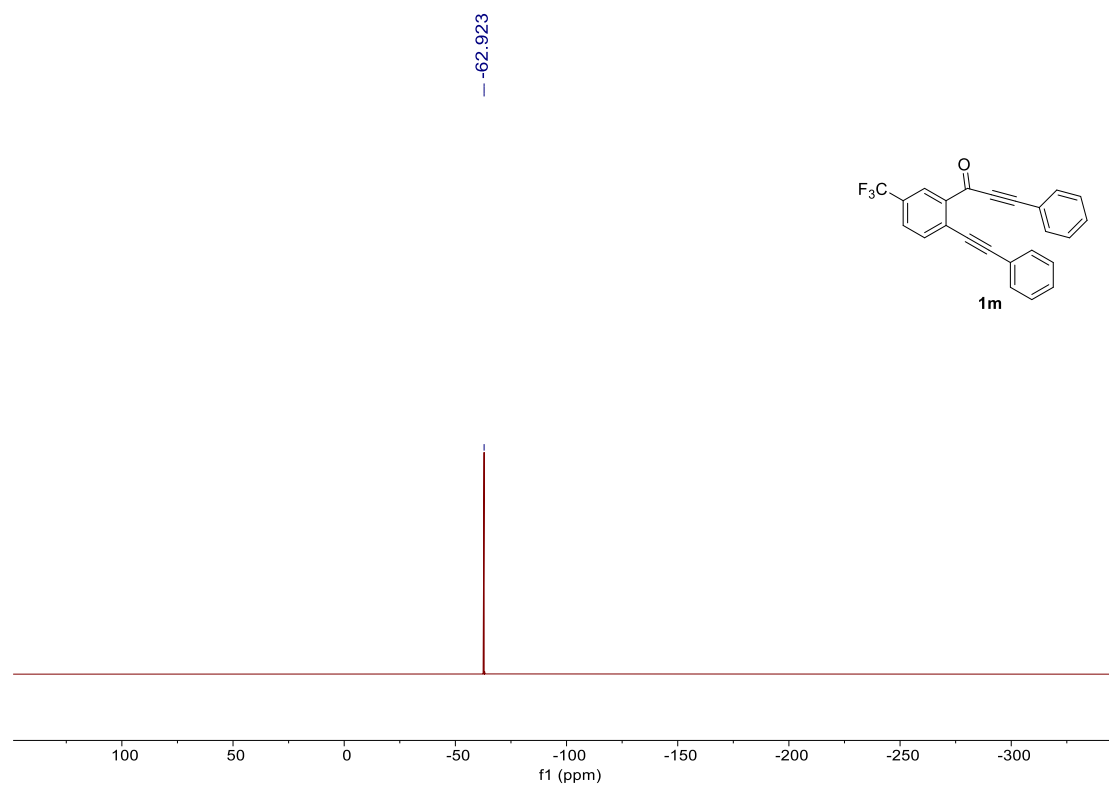

$^1\text{H}$  NMR (500 MHz, DMSO- $d_6$ )

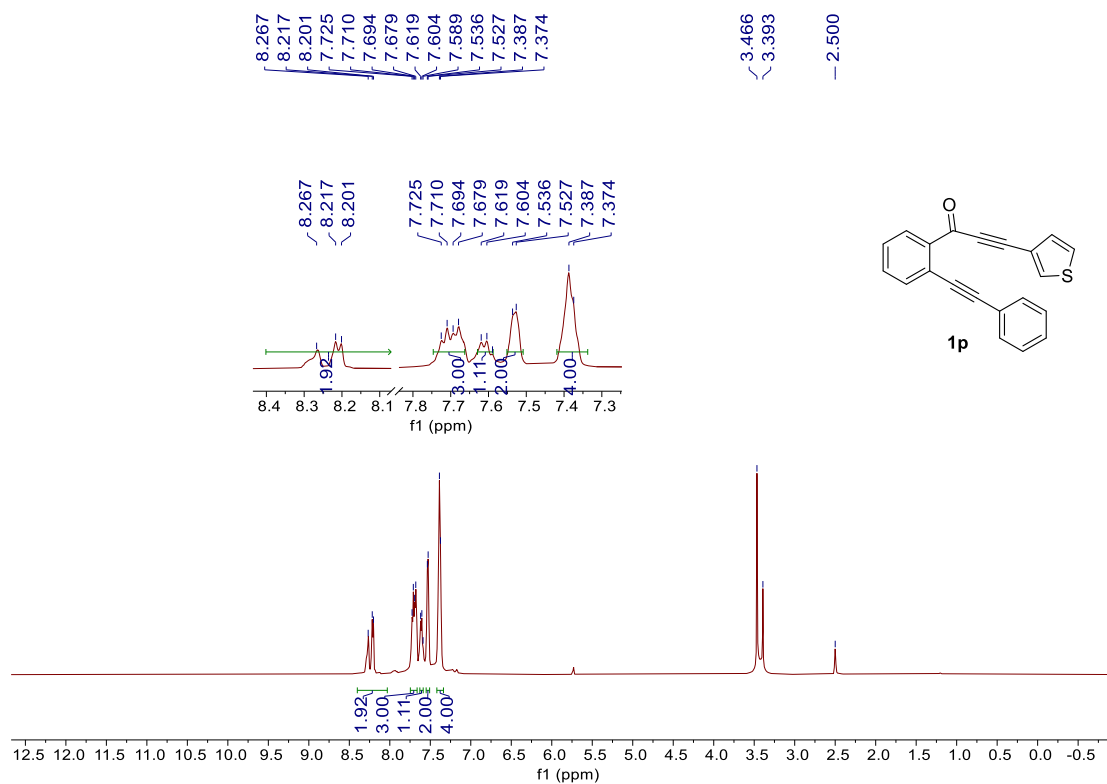

$^{13}\text{C}$  NMR (125 MHz, DMSO- $d_6$ )

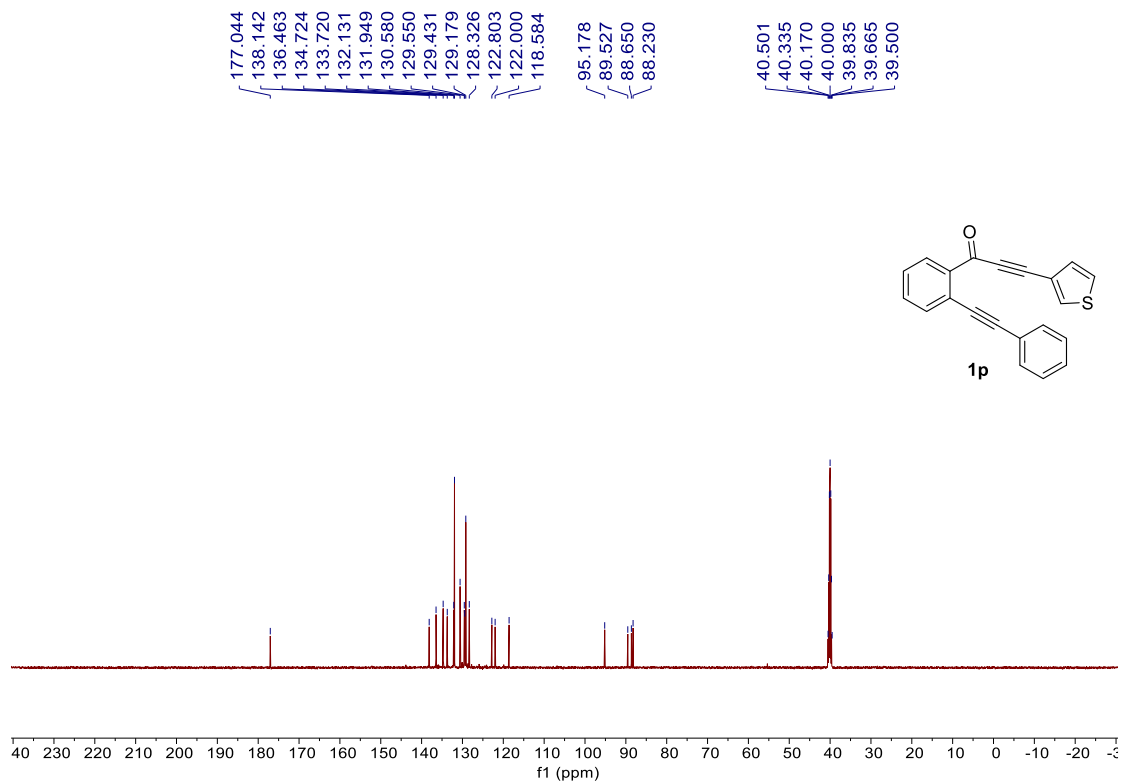

$^1\text{H}$  NMR (600 MHz,  $\text{CDCl}_3$ )

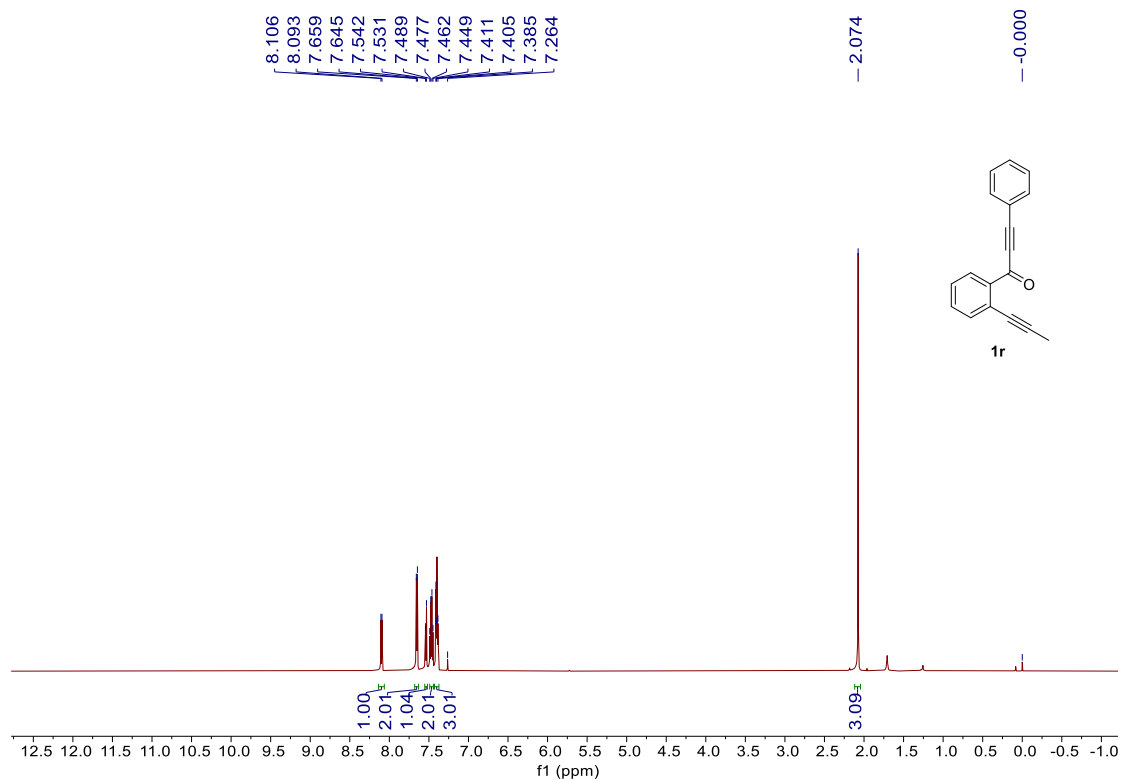

$^{13}\text{C}$  NMR (600 MHz,  $\text{CDCl}_3$ )

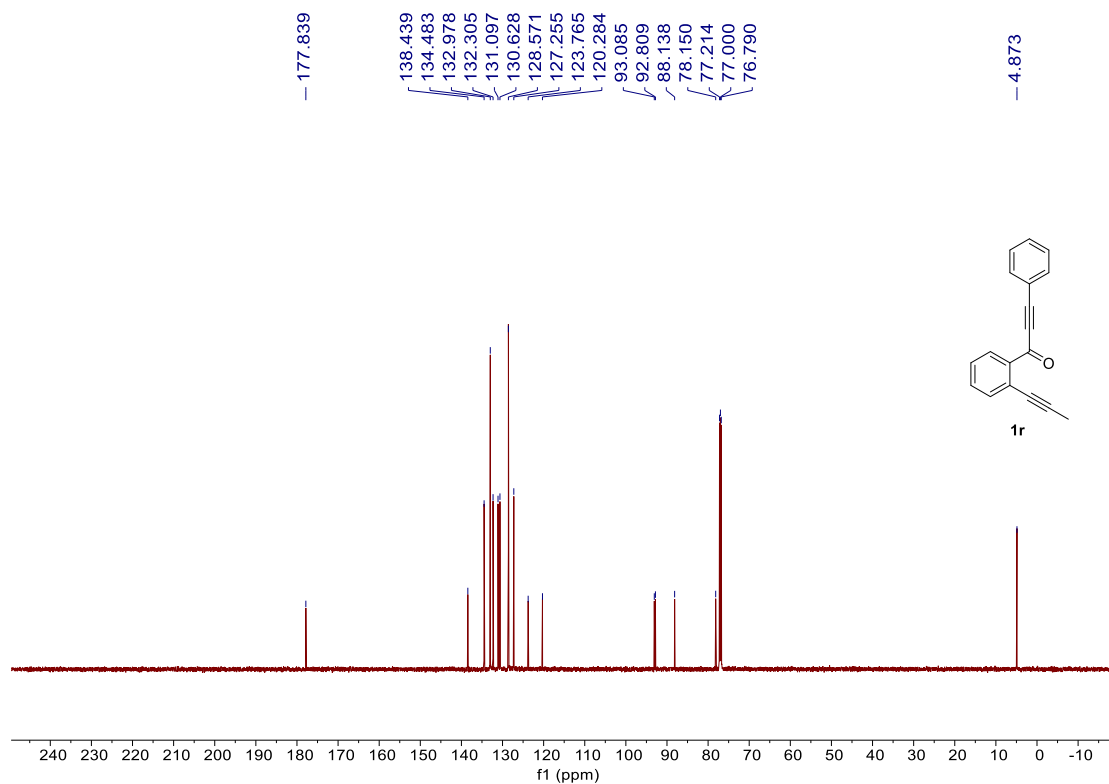



## 9. Copies of spectra of products

### $^1\text{H}$ NMR (500 MHz, $\text{CDCl}_3$ )

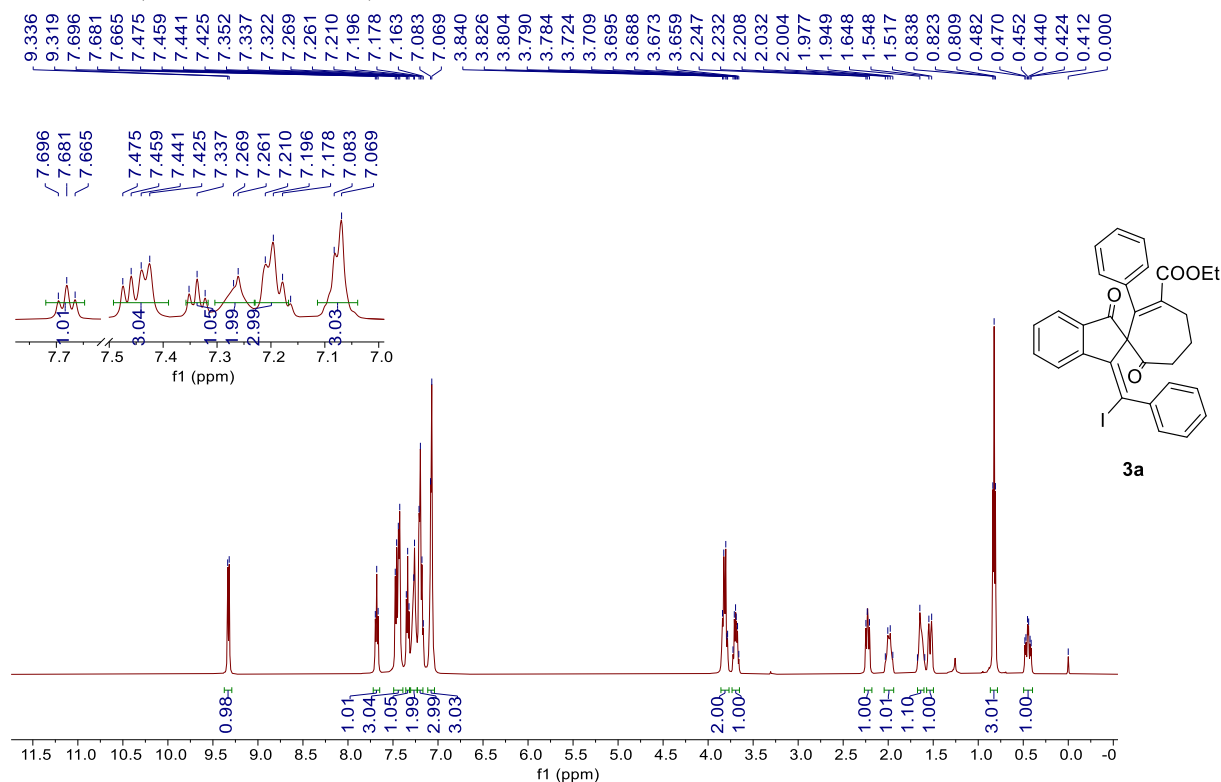

### $^{13}\text{C}$ NMR (125 MHz, $\text{CDCl}_3$ )

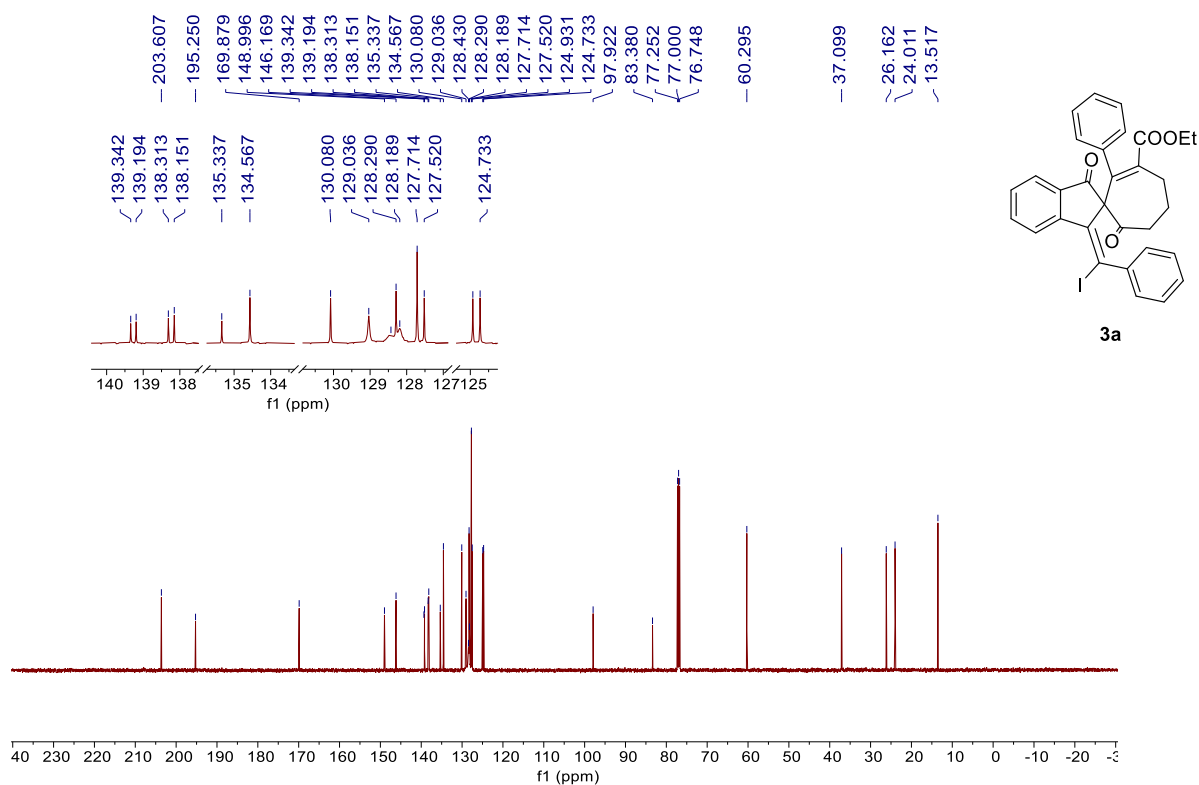

$^1\text{H}$  NMR (500 MHz,  $\text{CDCl}_3$ )

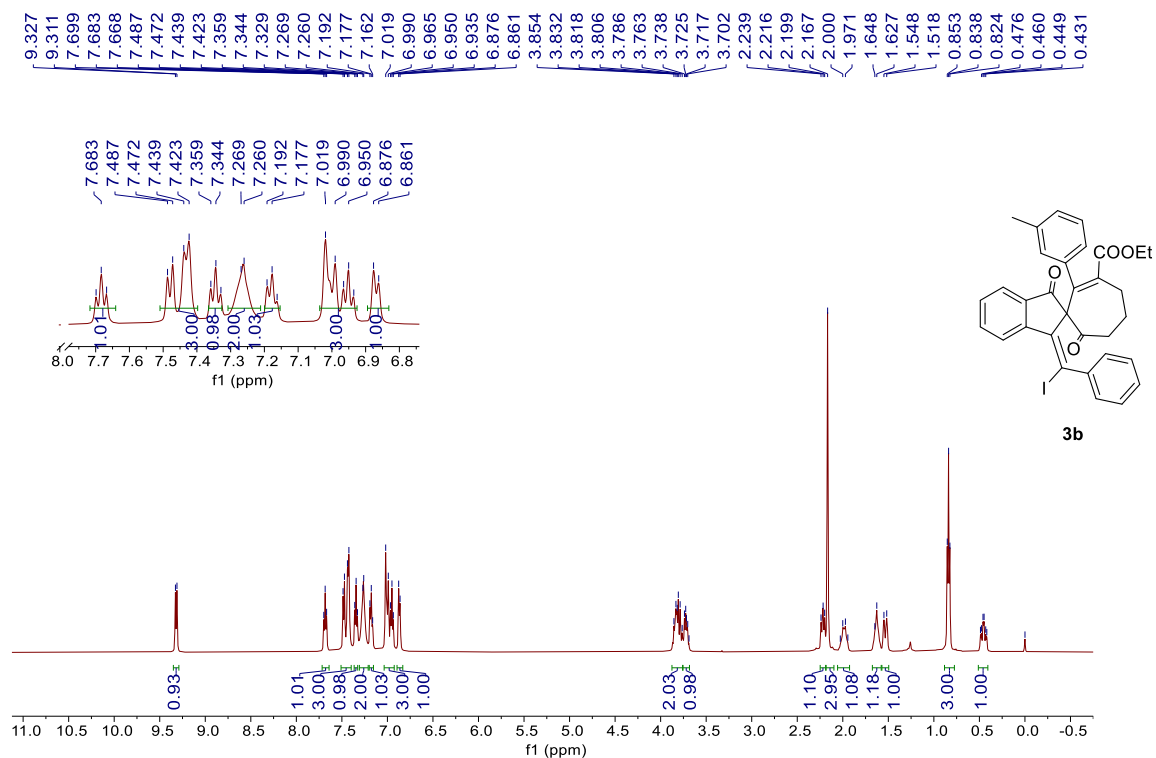

$^{13}\text{C}$  NMR (125 MHz,  $\text{CDCl}_3$ )

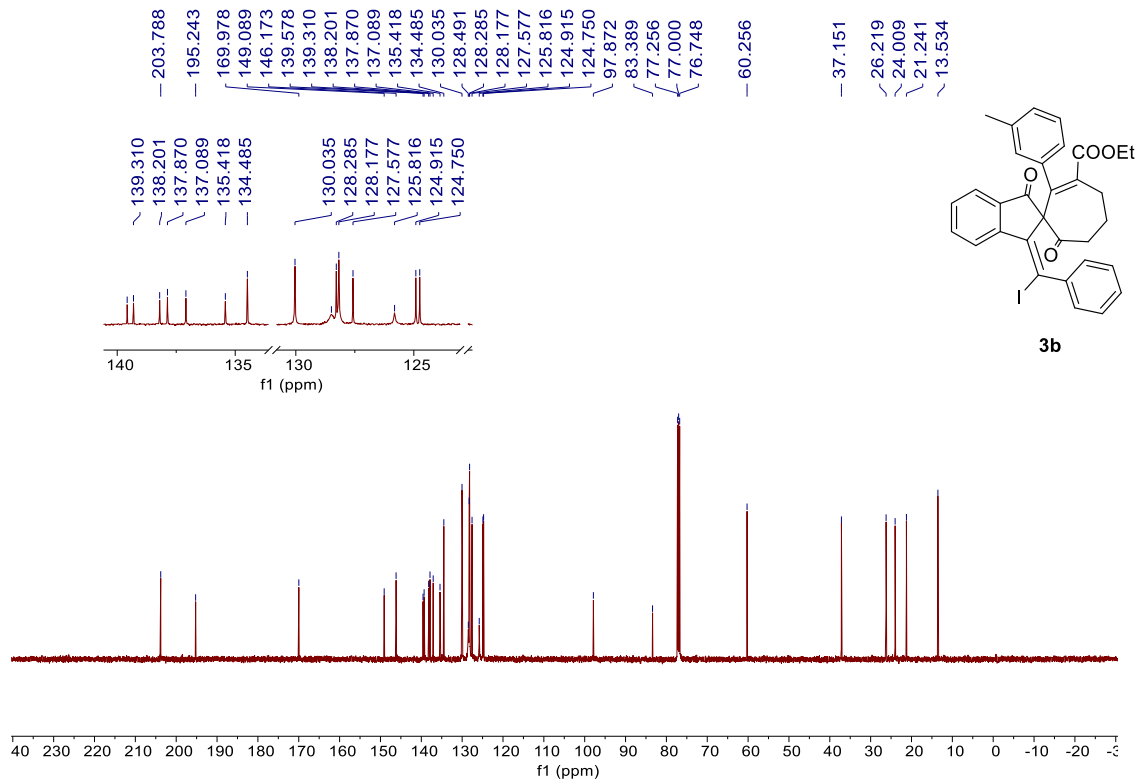

$^1\text{H}$  NMR (500 MHz,  $\text{CDCl}_3$ )

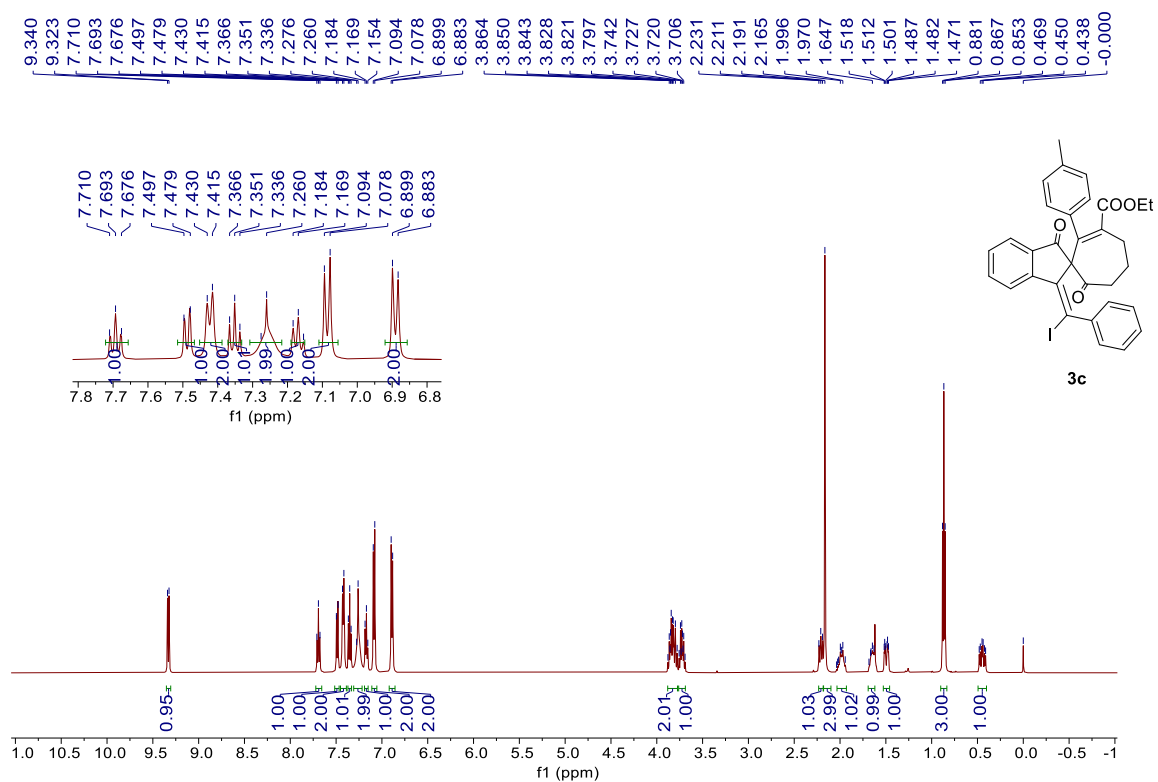

$^{13}\text{C}$  NMR (125 MHz,  $\text{CDCl}_3$ )

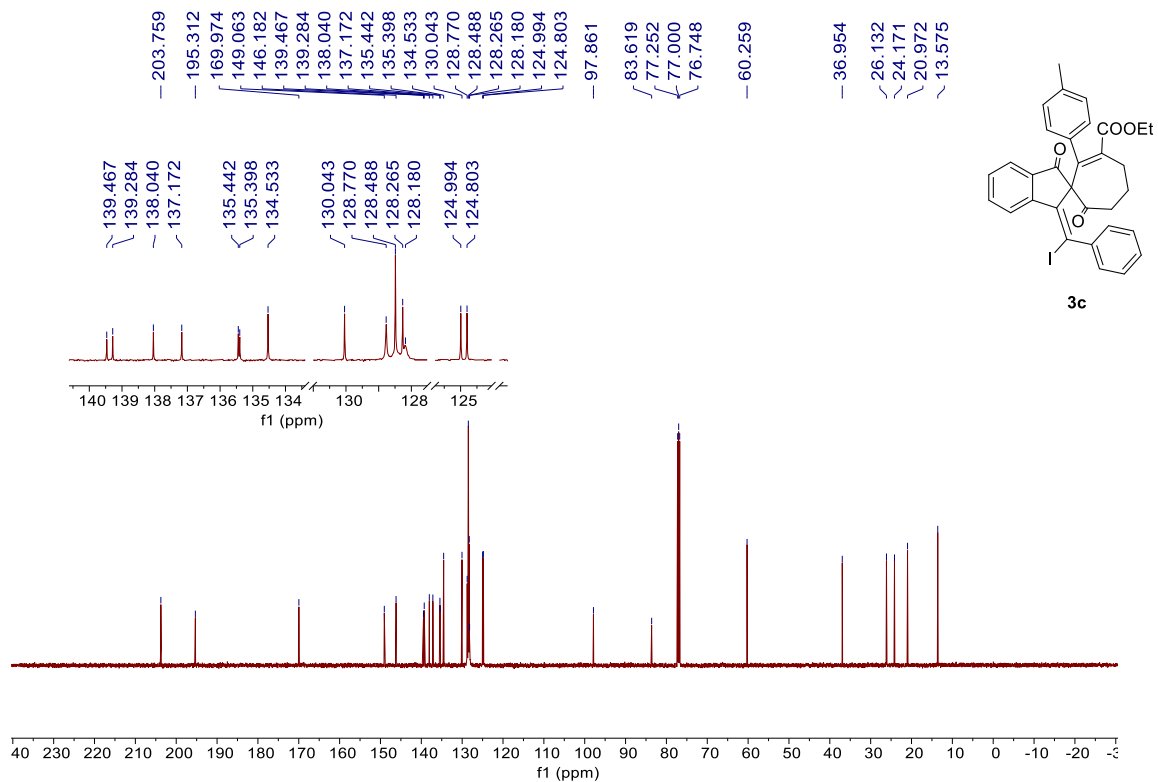

$^1\text{H}$  NMR (500 MHz,  $\text{CDCl}_3$ )

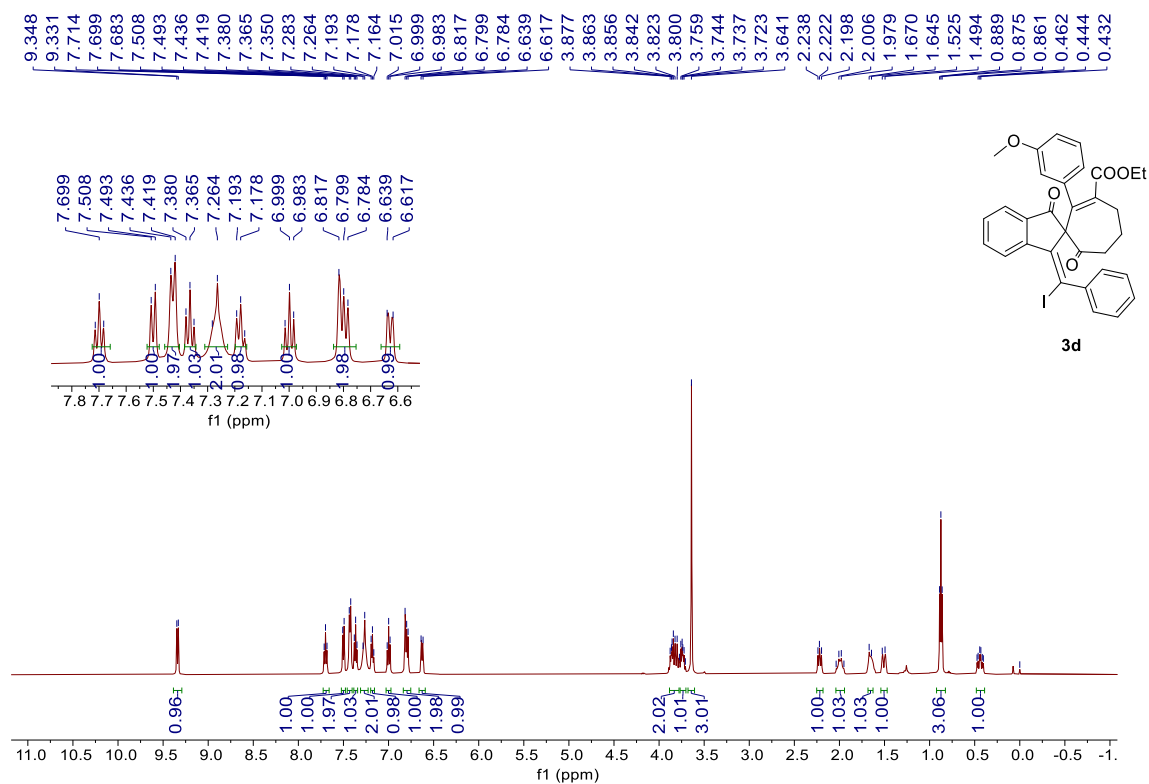

$^{13}\text{C}$  NMR (125 MHz,  $\text{CDCl}_3$ )

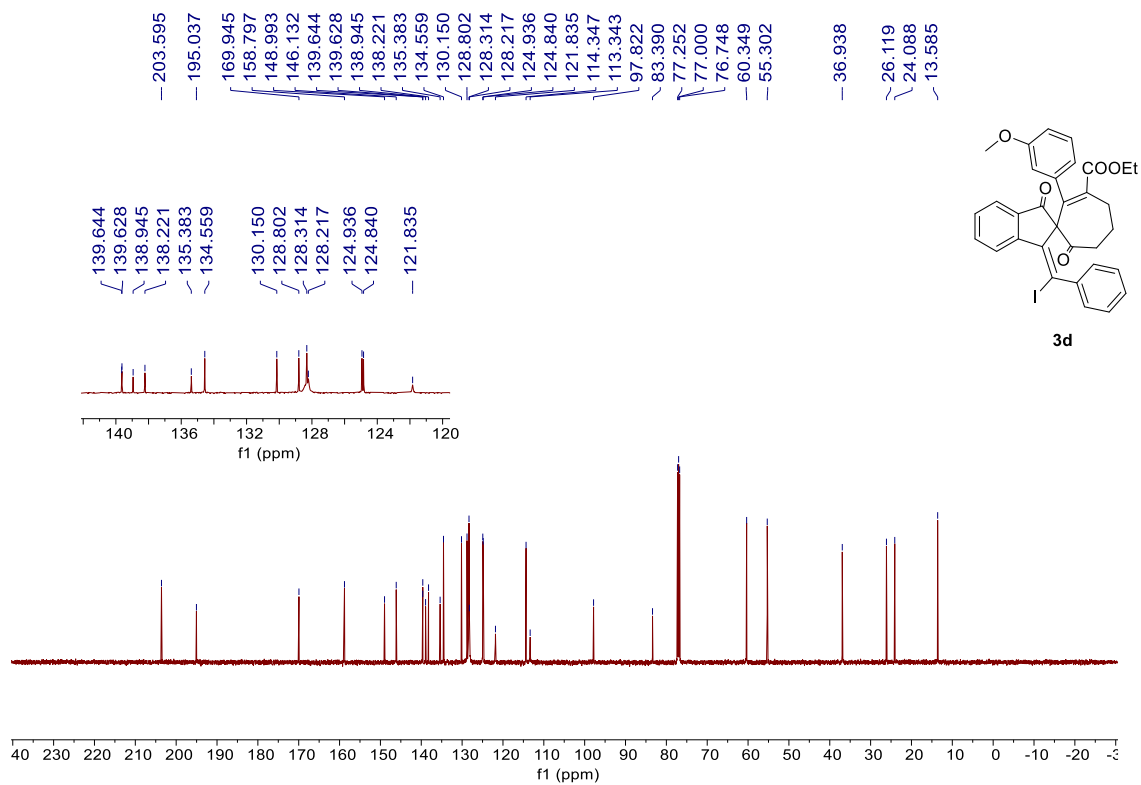

$^1\text{H}$  NMR (500 MHz,  $\text{CDCl}_3$ )

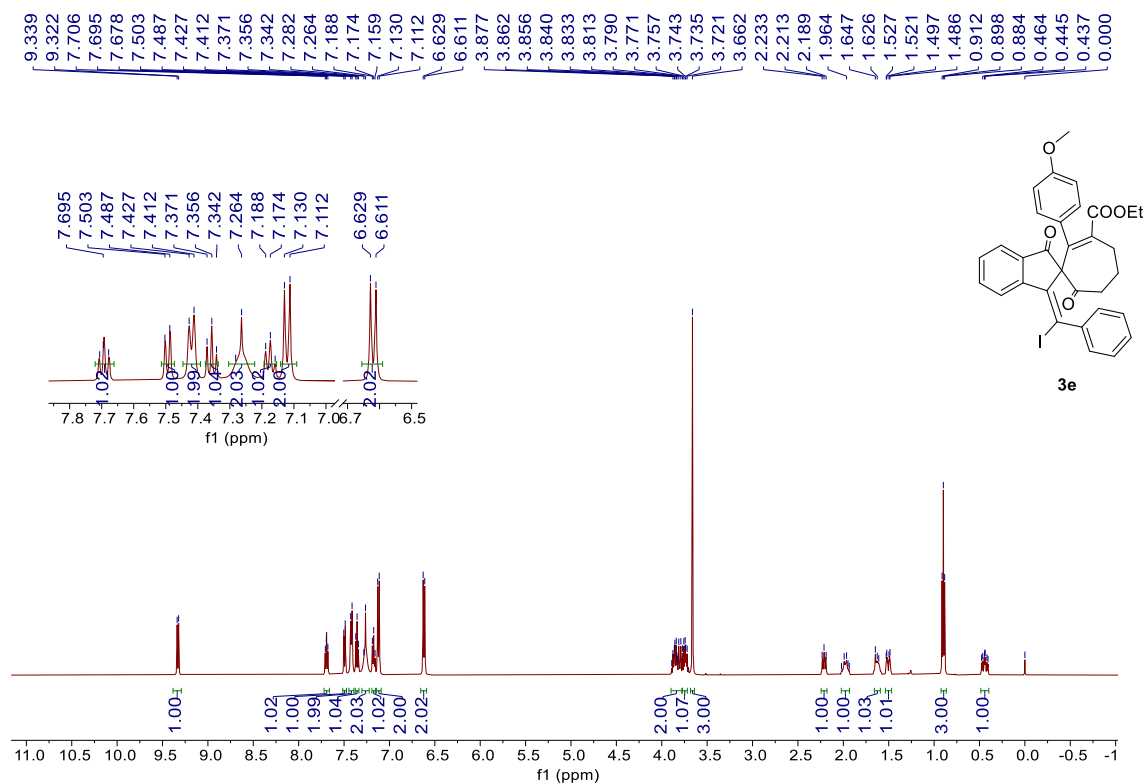

$^{13}\text{C}$  NMR (125 MHz,  $\text{CDCl}_3$ )

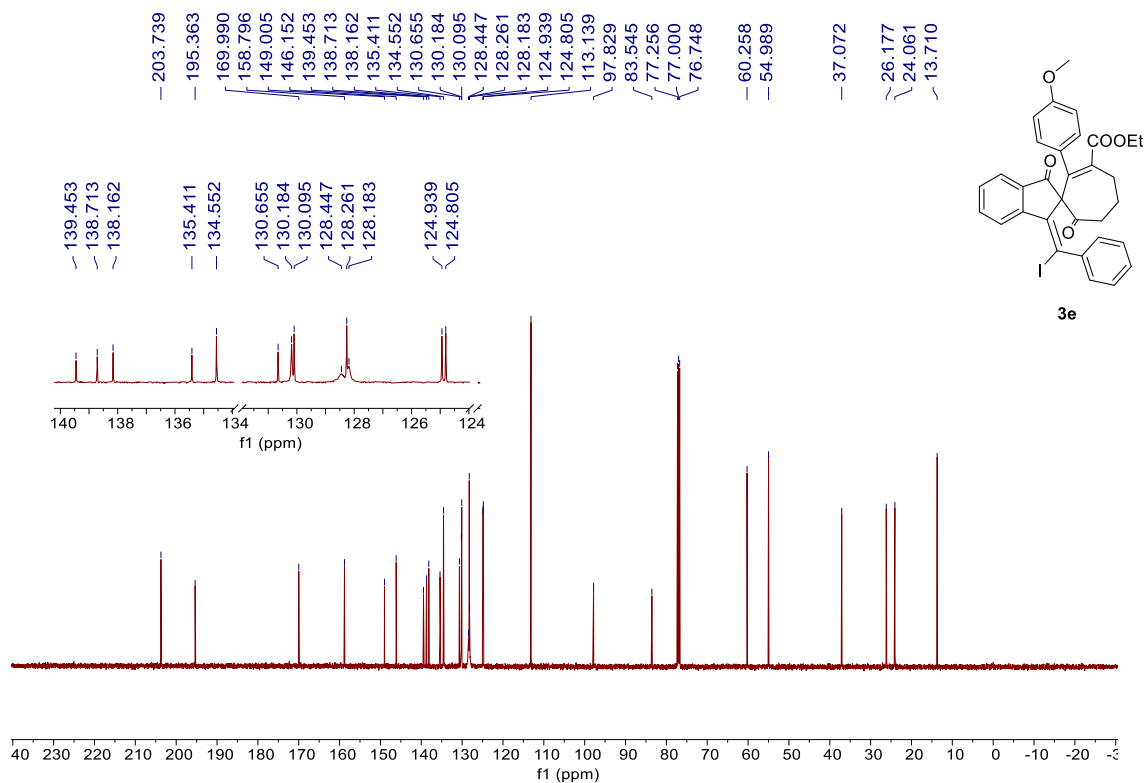

$^1\text{H}$  NMR (500 MHz,  $\text{CDCl}_3$ )

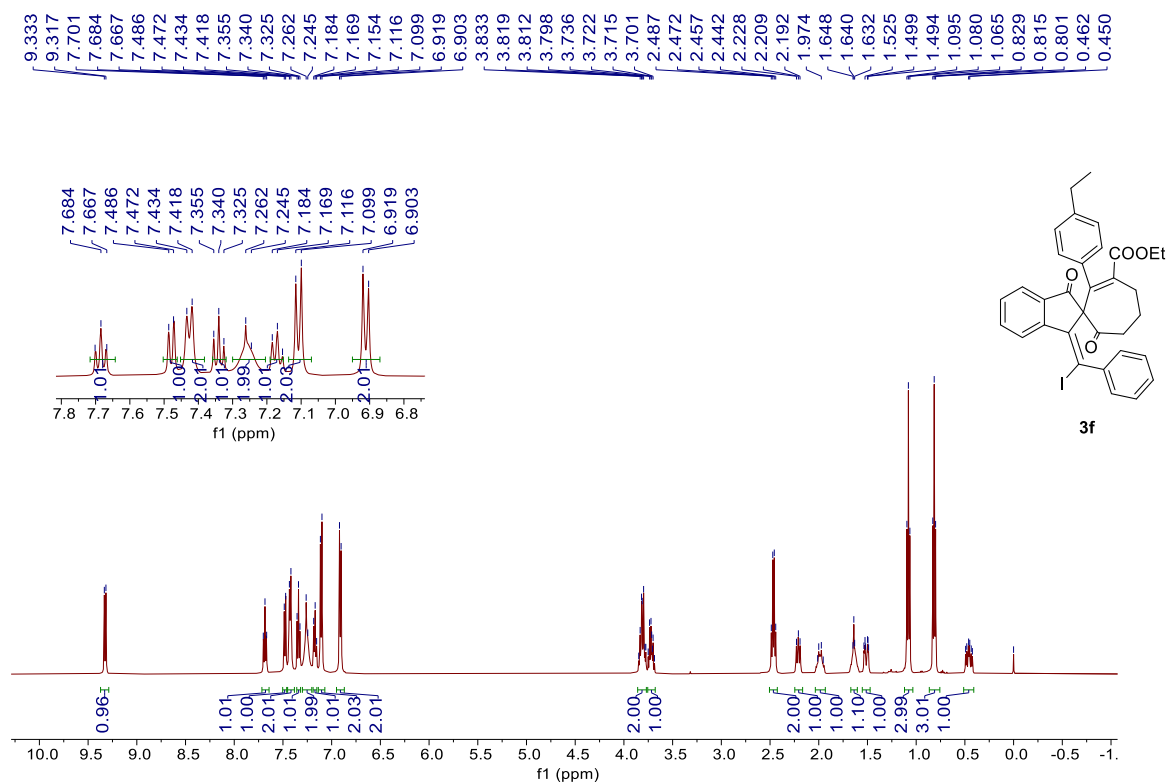

$^{13}\text{C}$  NMR (125 MHz,  $\text{CDCl}_3$ )

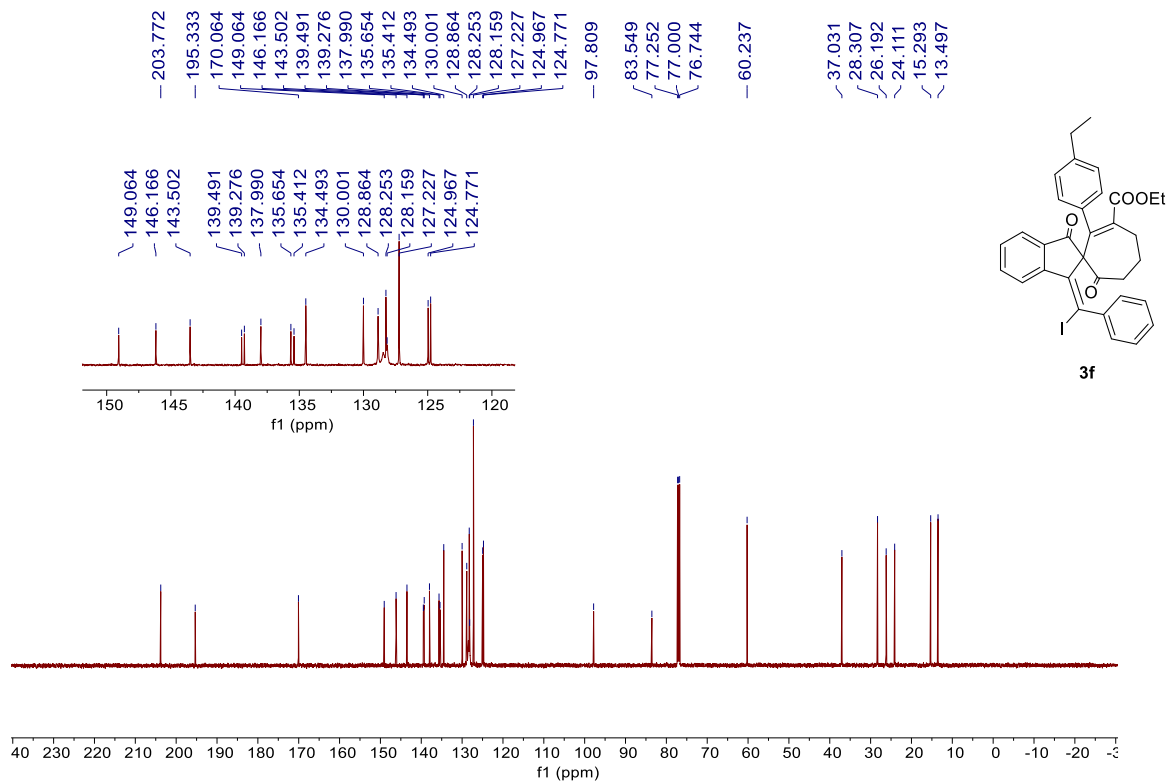

$^1\text{H}$  NMR (500 MHz,  $\text{CDCl}_3$ )

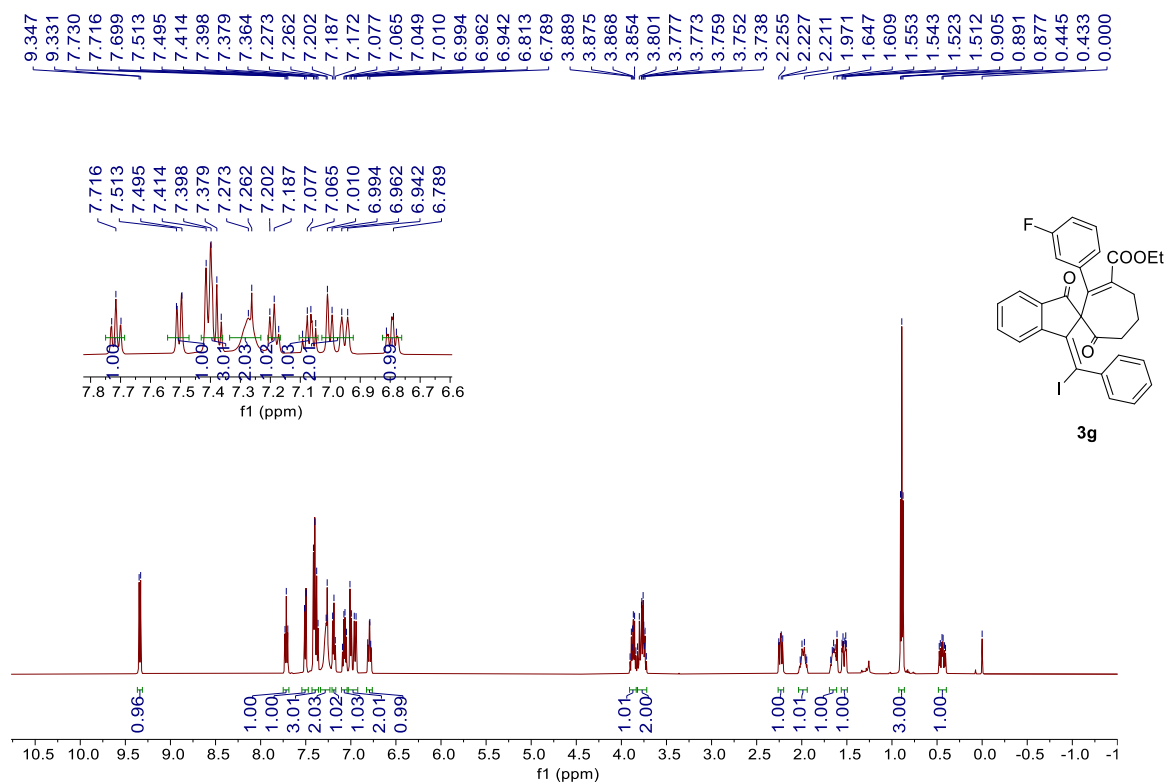

$^{13}\text{C}$  NMR (125 MHz,  $\text{CDCl}_3$ )

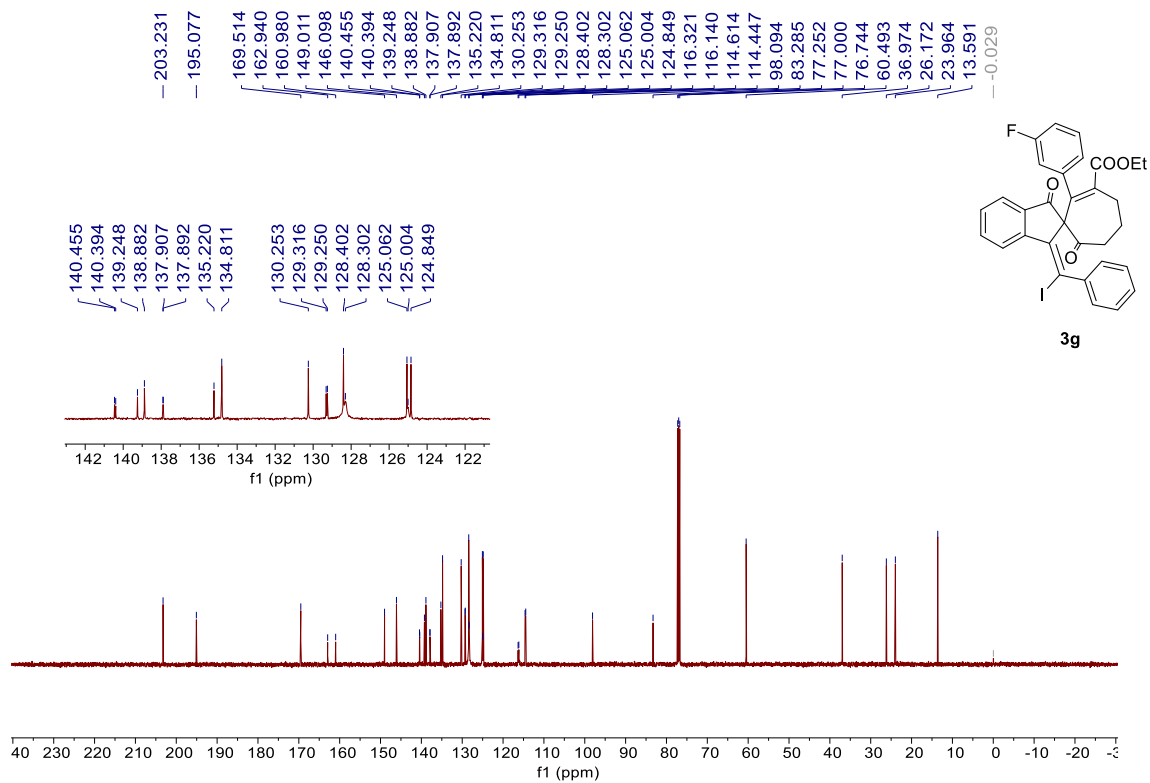

$^{19}\text{F}$  NMR (471 MHz,  $\text{CDCl}_3$ )

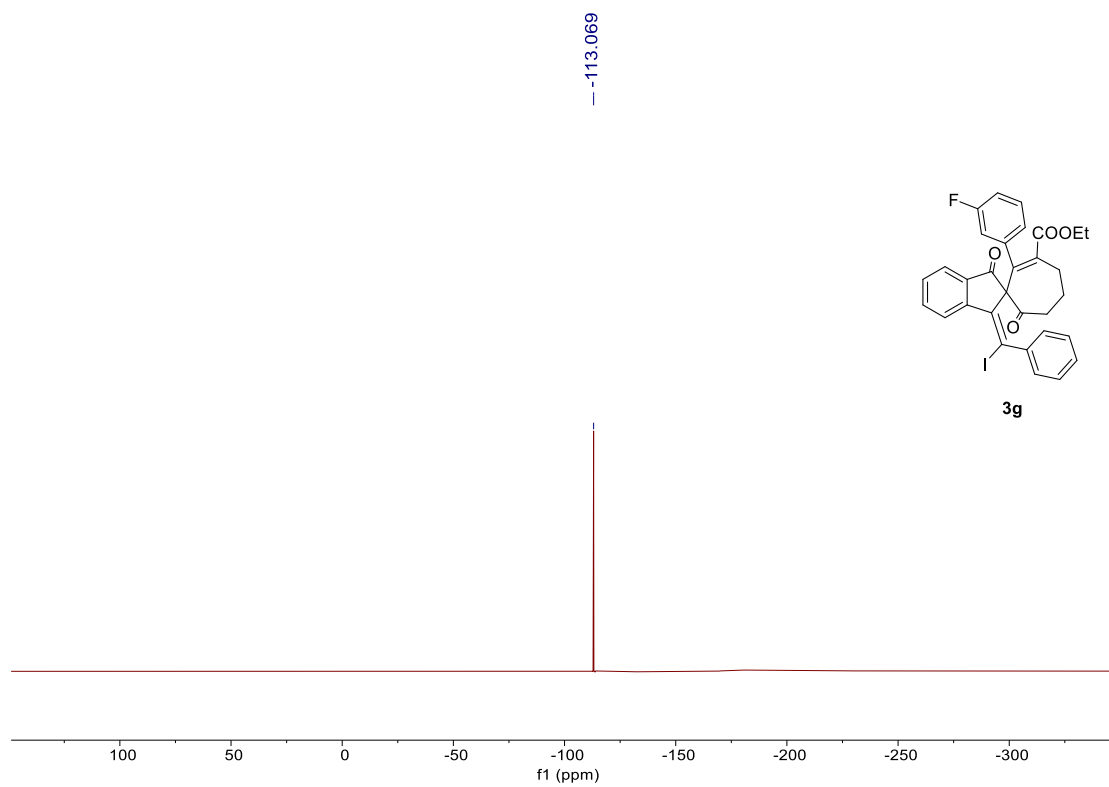



$^1\text{H}$  NMR (500 MHz,  $\text{CDCl}_3$ )

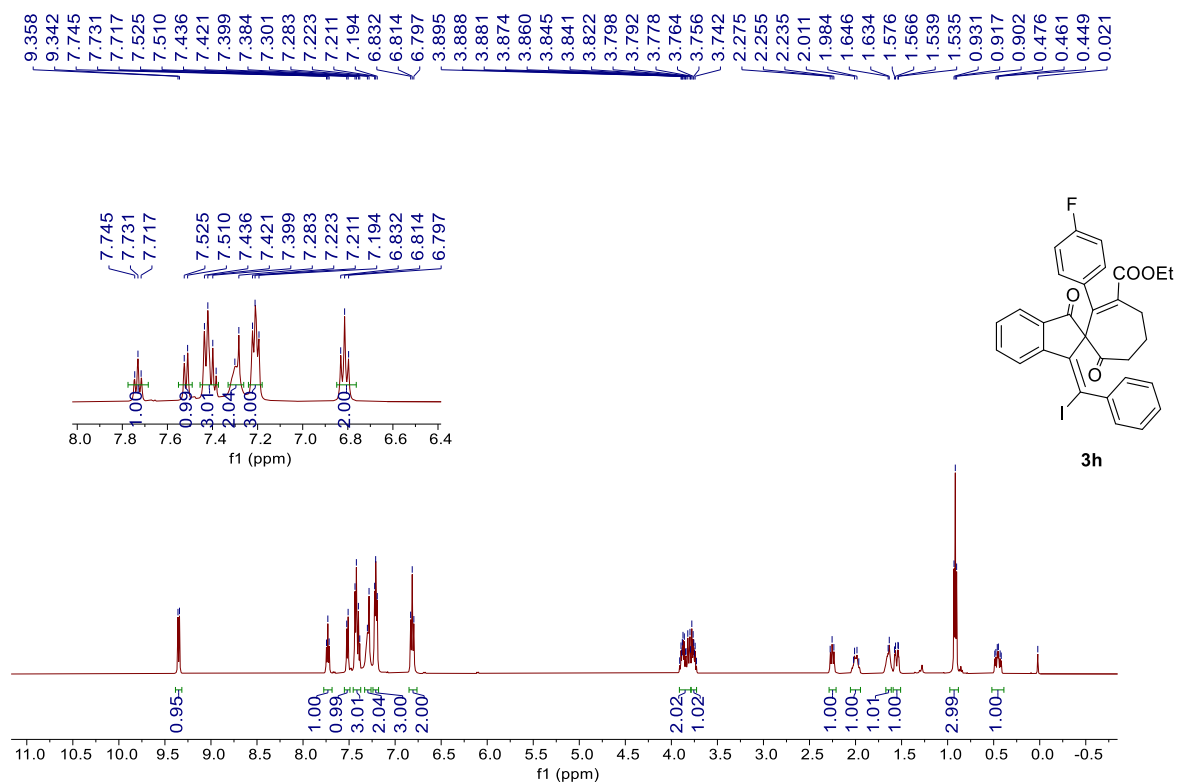

$^{13}\text{C}$  NMR (125 MHz,  $\text{CDCl}_3$ )

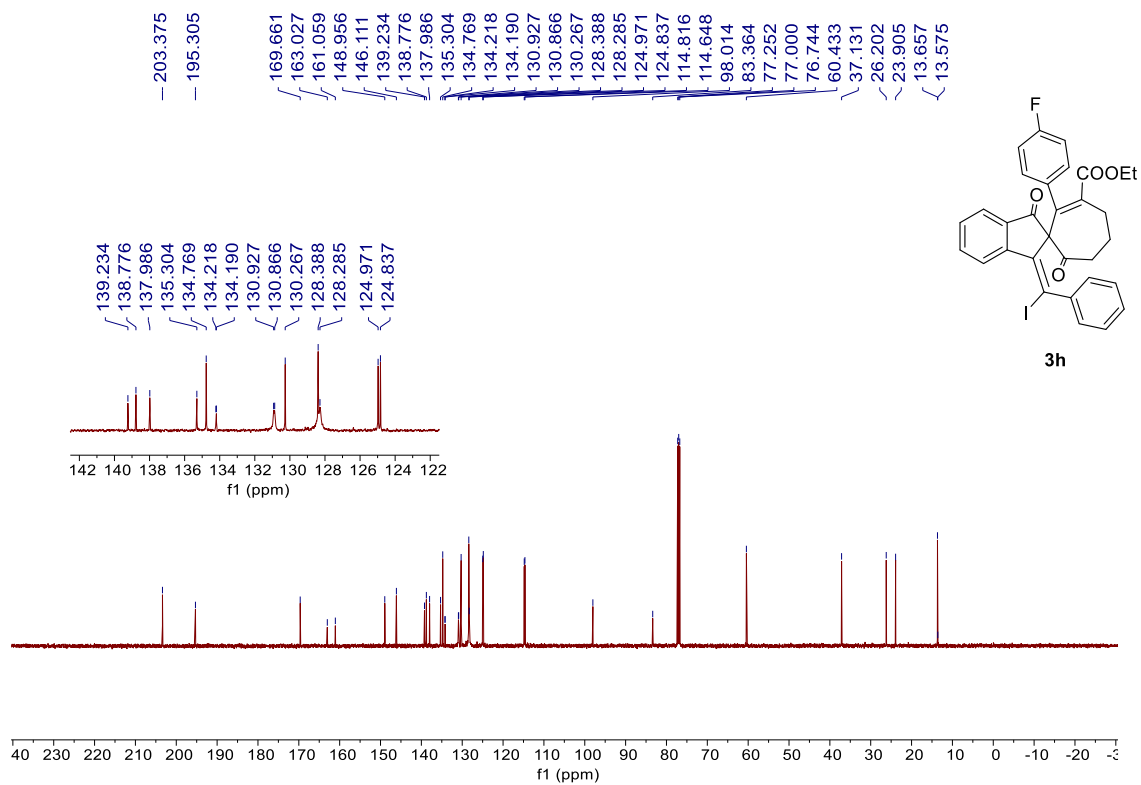

$^{19}\text{F}$  NMR (471 MHz,  $\text{CDCl}_3$ )

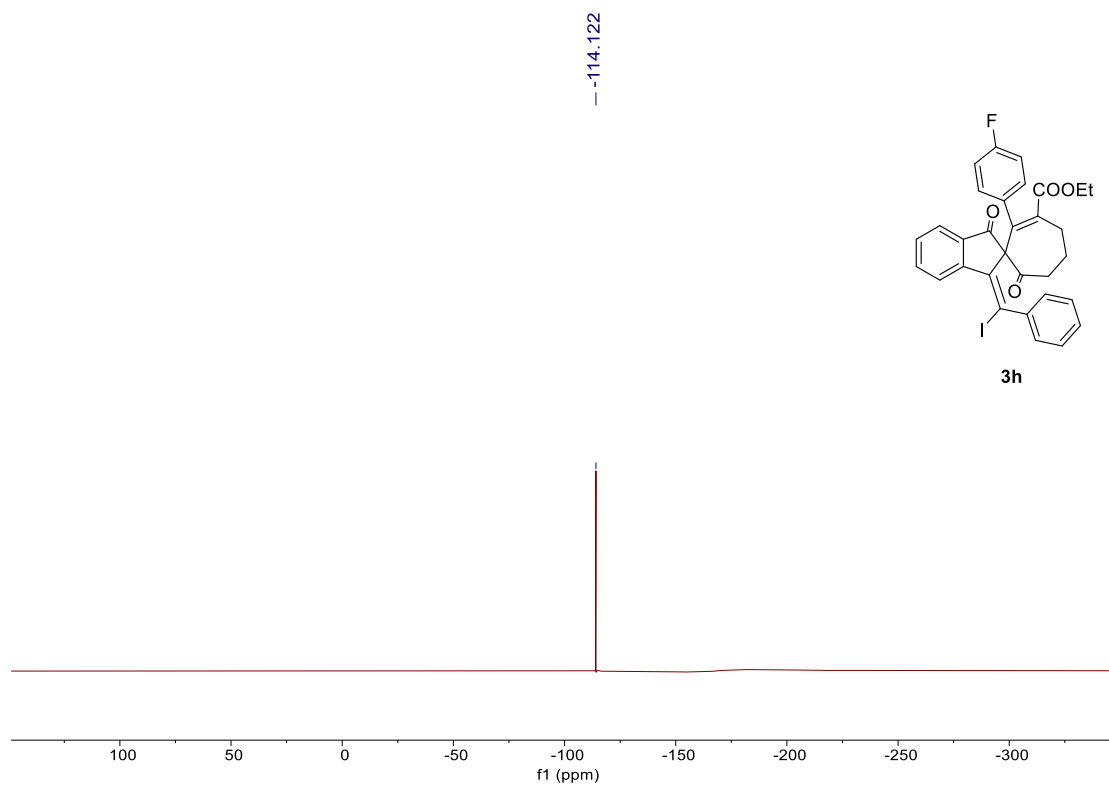

<sup>1</sup>H NMR (500 MHz, CDCl<sub>3</sub>)

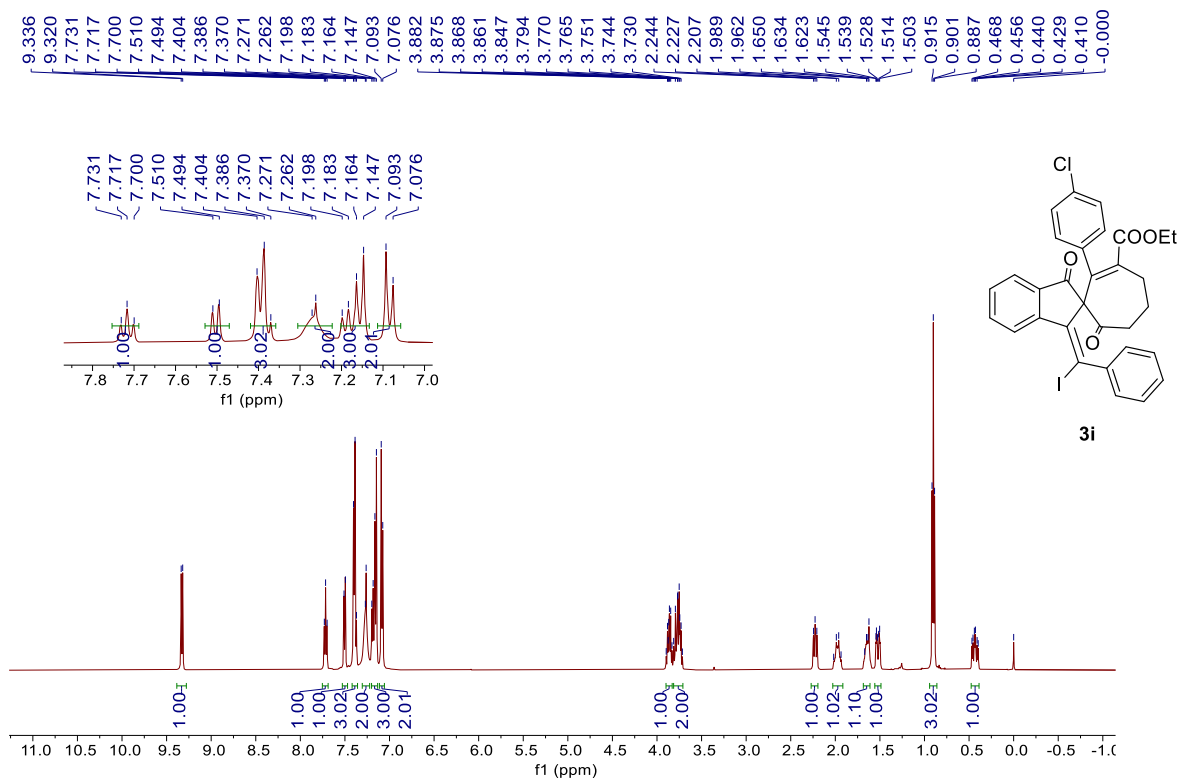

<sup>13</sup>C NMR (125 MHz, CDCl<sub>3</sub>)

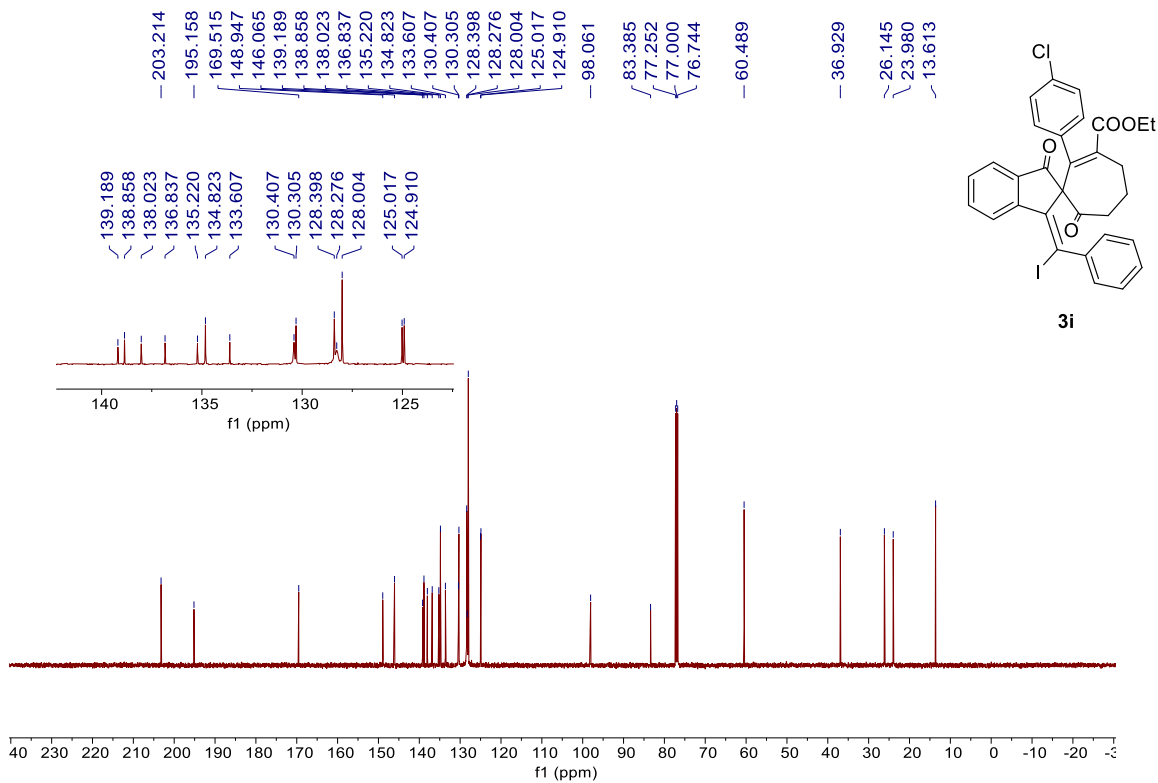

$^1\text{H}$  NMR (500 MHz,  $\text{CDCl}_3$ )

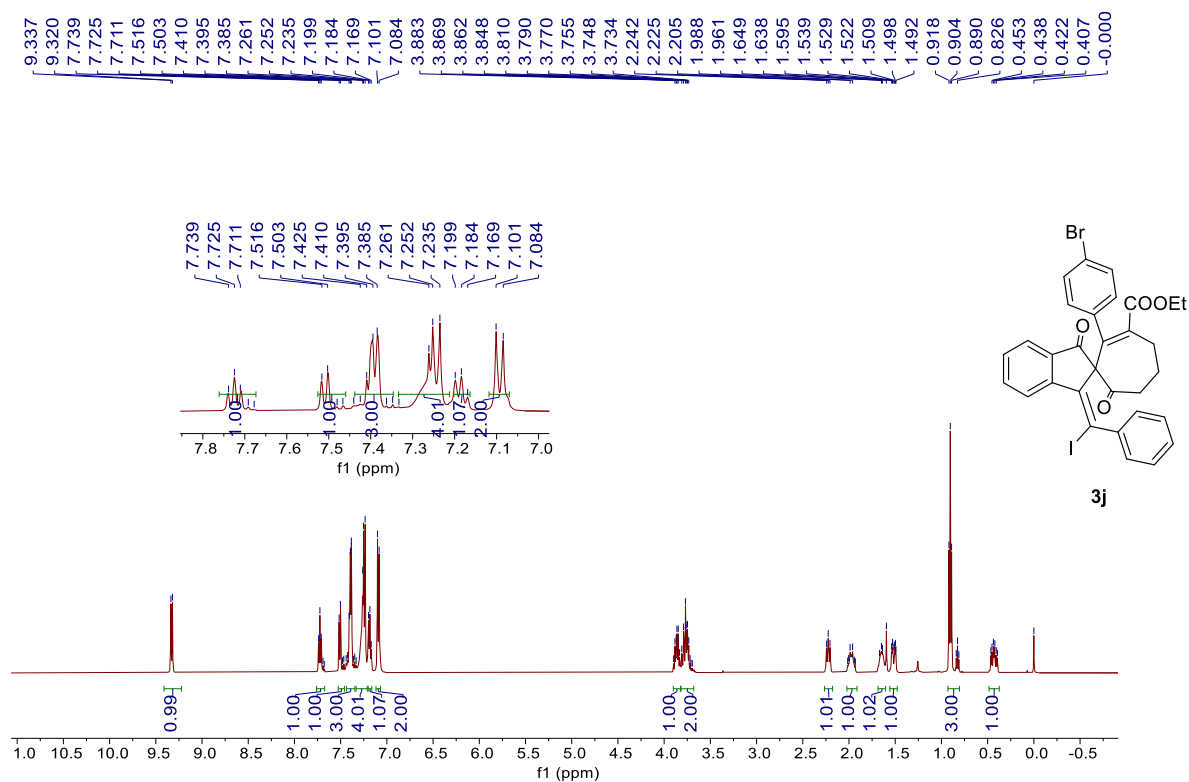

$^{13}\text{C}$  NMR (125 MHz,  $\text{CDCl}_3$ )

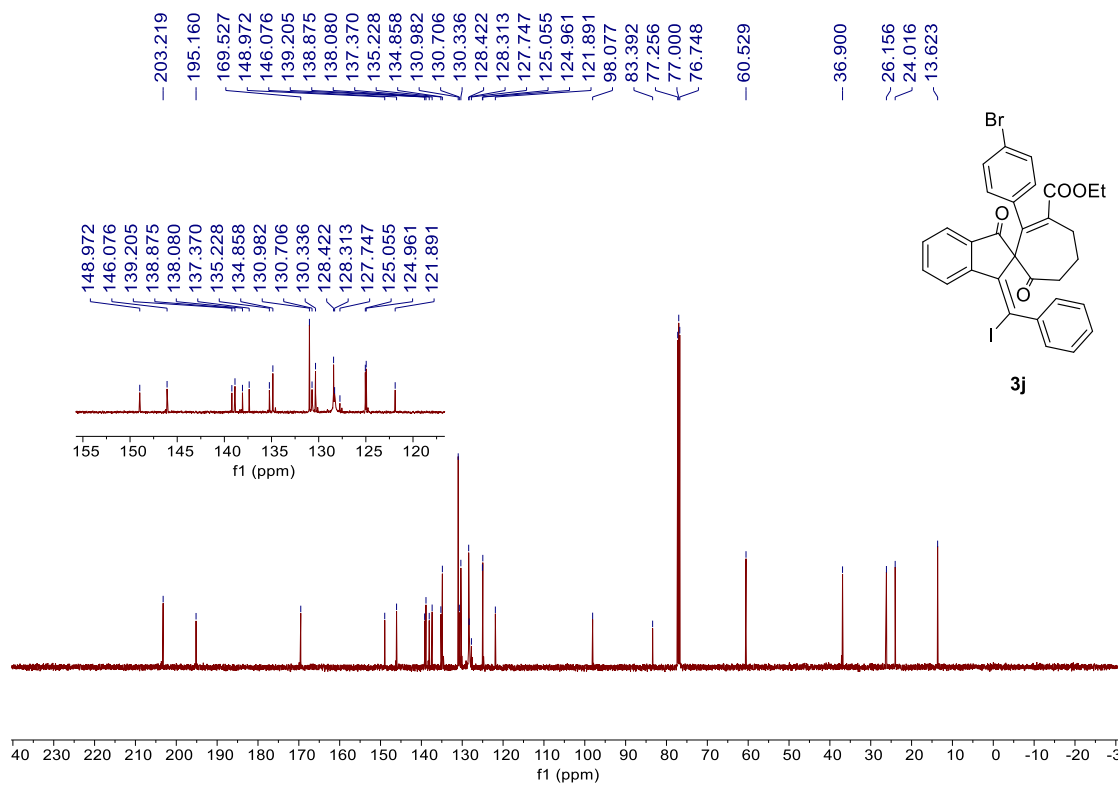

$^1\text{H}$  NMR (600 MHz,  $\text{CDCl}_3$ )

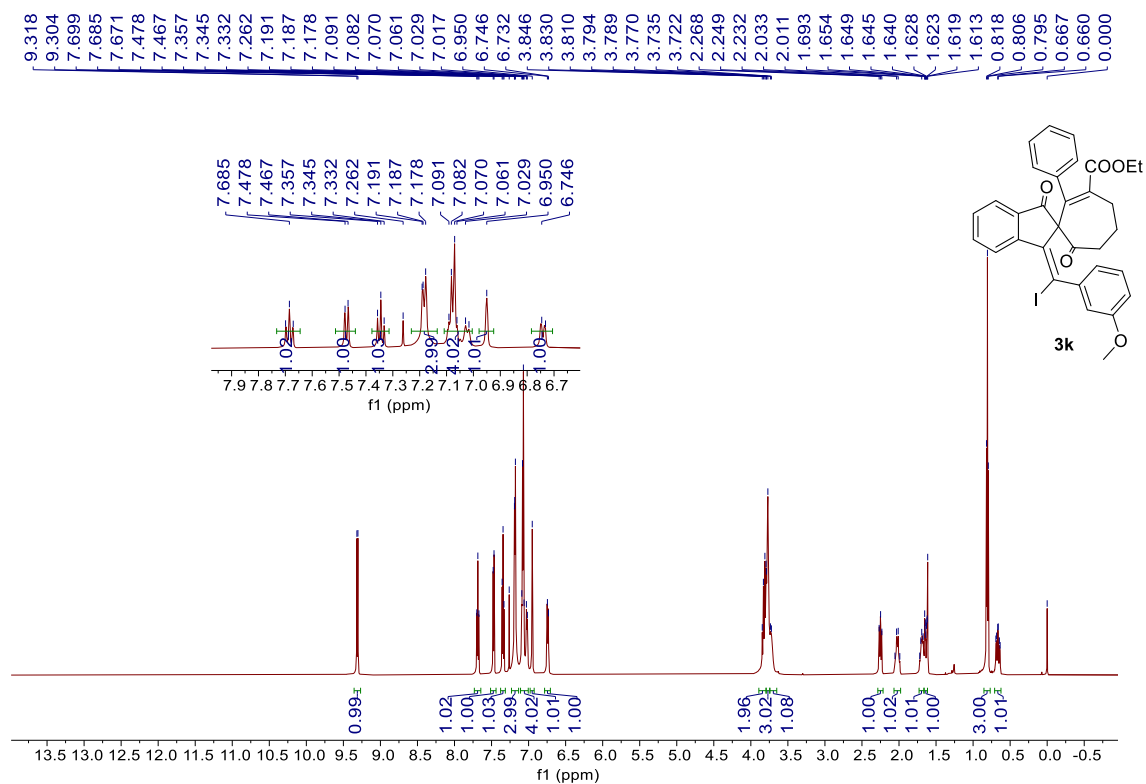

$^{13}\text{C}$  NMR (150 MHz,  $\text{CDCl}_3$ )

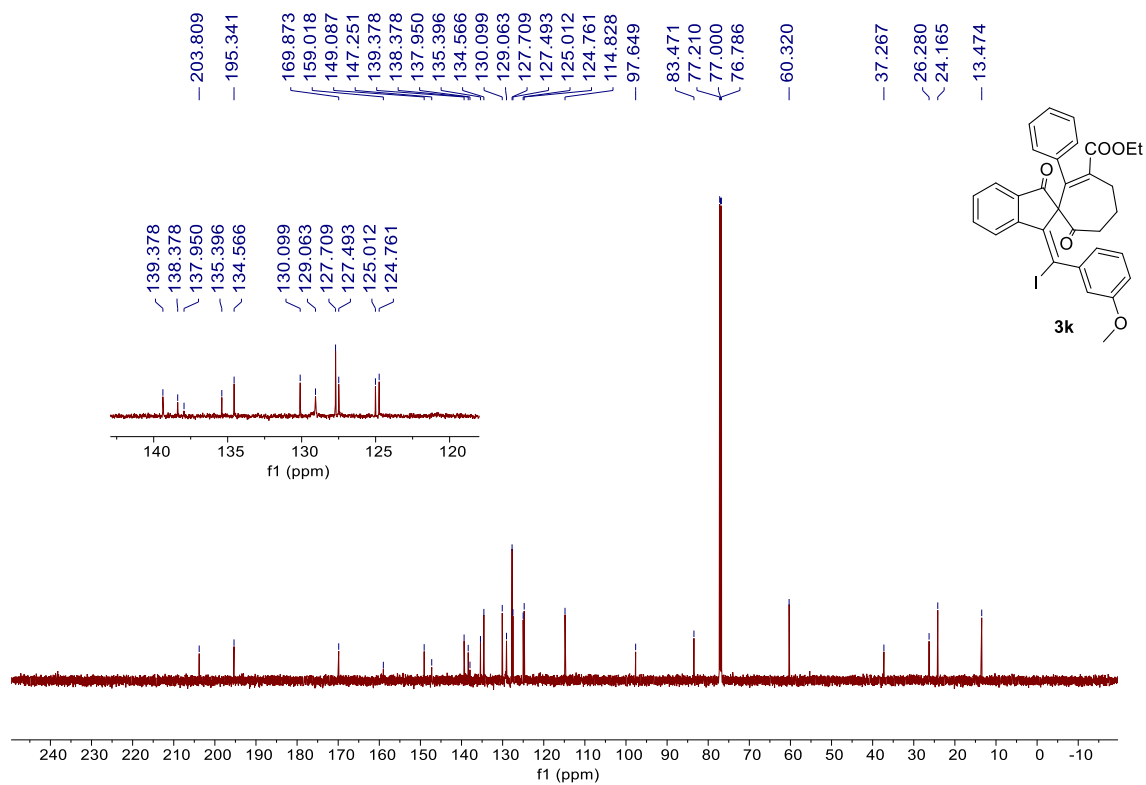

$^1\text{H}$  NMR (500 MHz,  $\text{CDCl}_3$ )

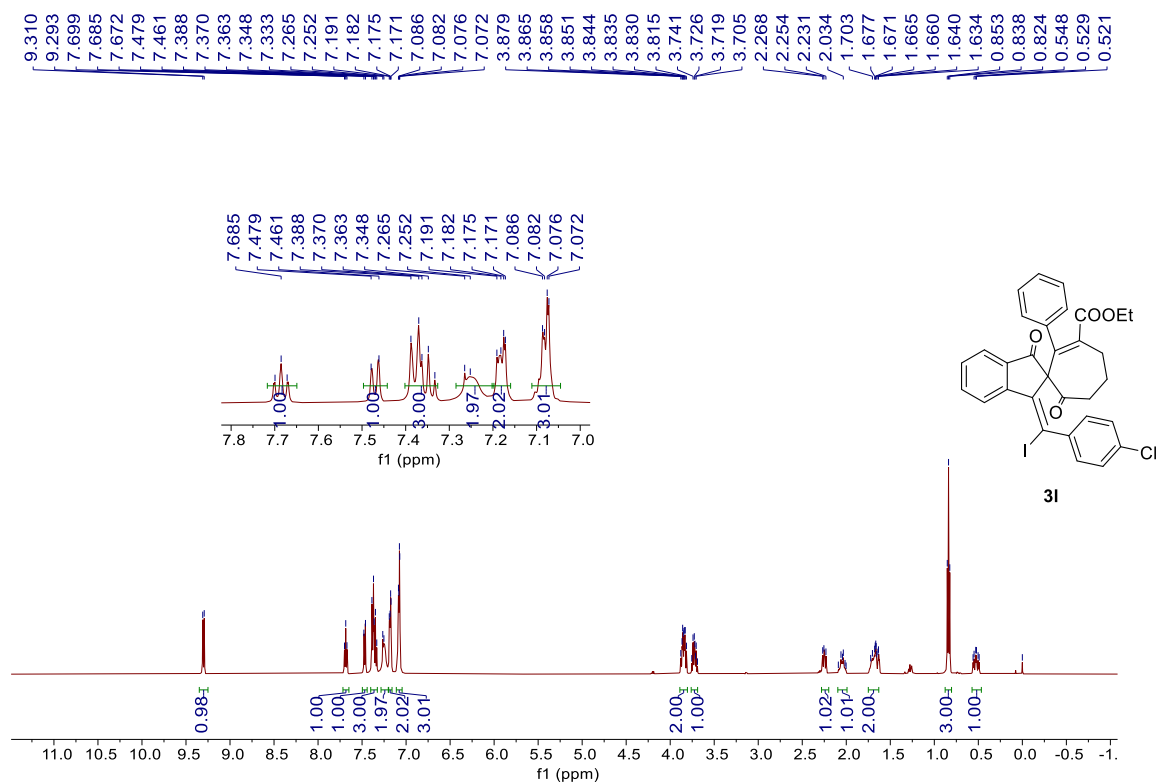

$^{13}\text{C}$  NMR (125 MHz,  $\text{CDCl}_3$ )

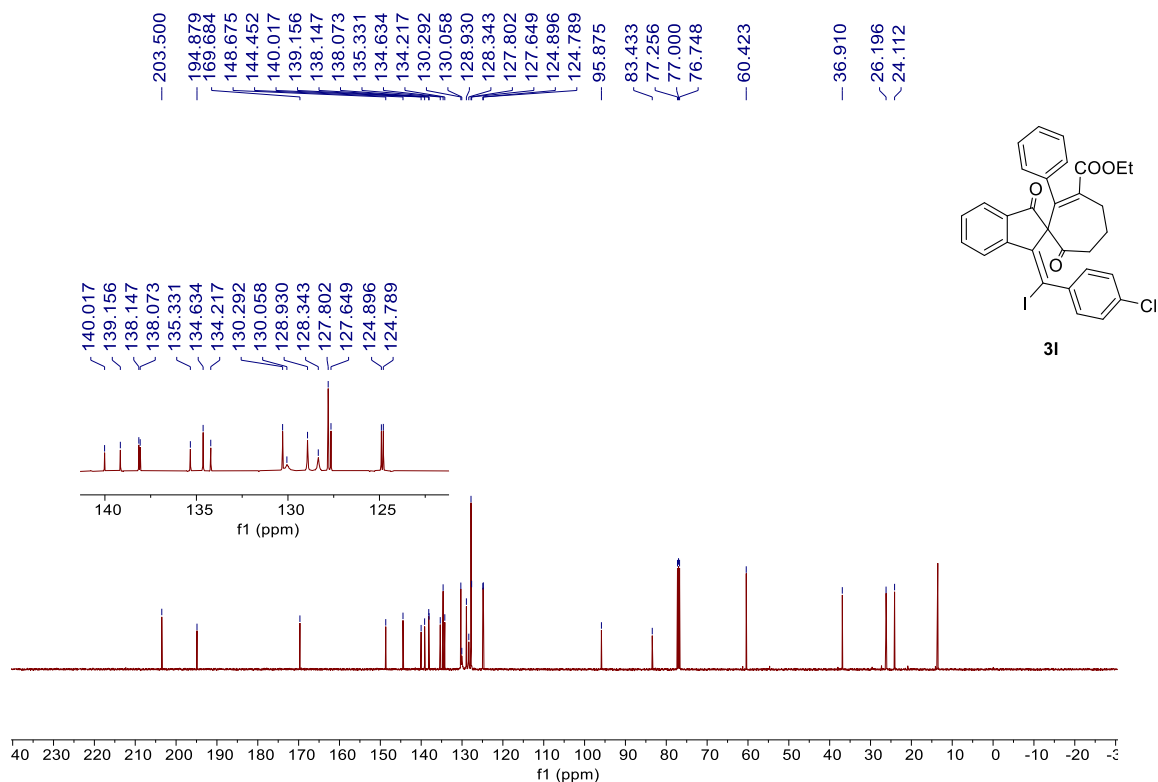

<sup>1</sup>H NMR (500 MHz, CDCl<sub>3</sub>)

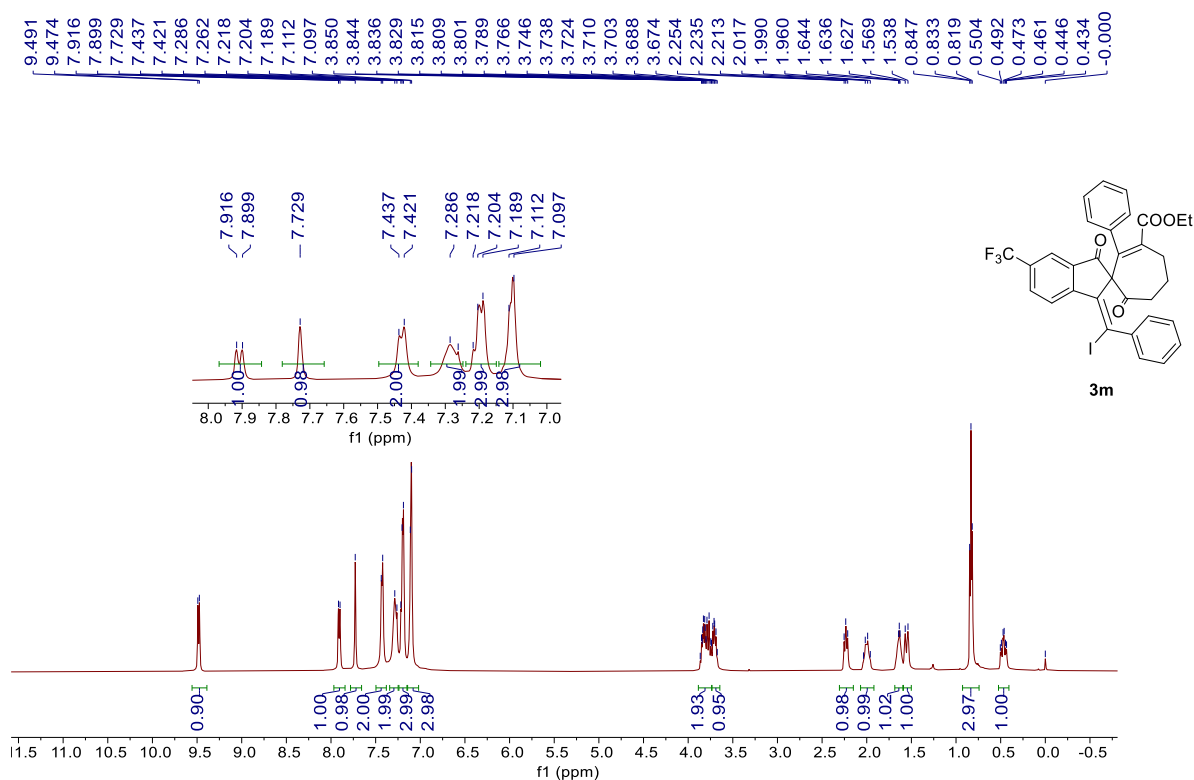

<sup>13</sup>C NMR (125 MHz, CDCl<sub>3</sub>)

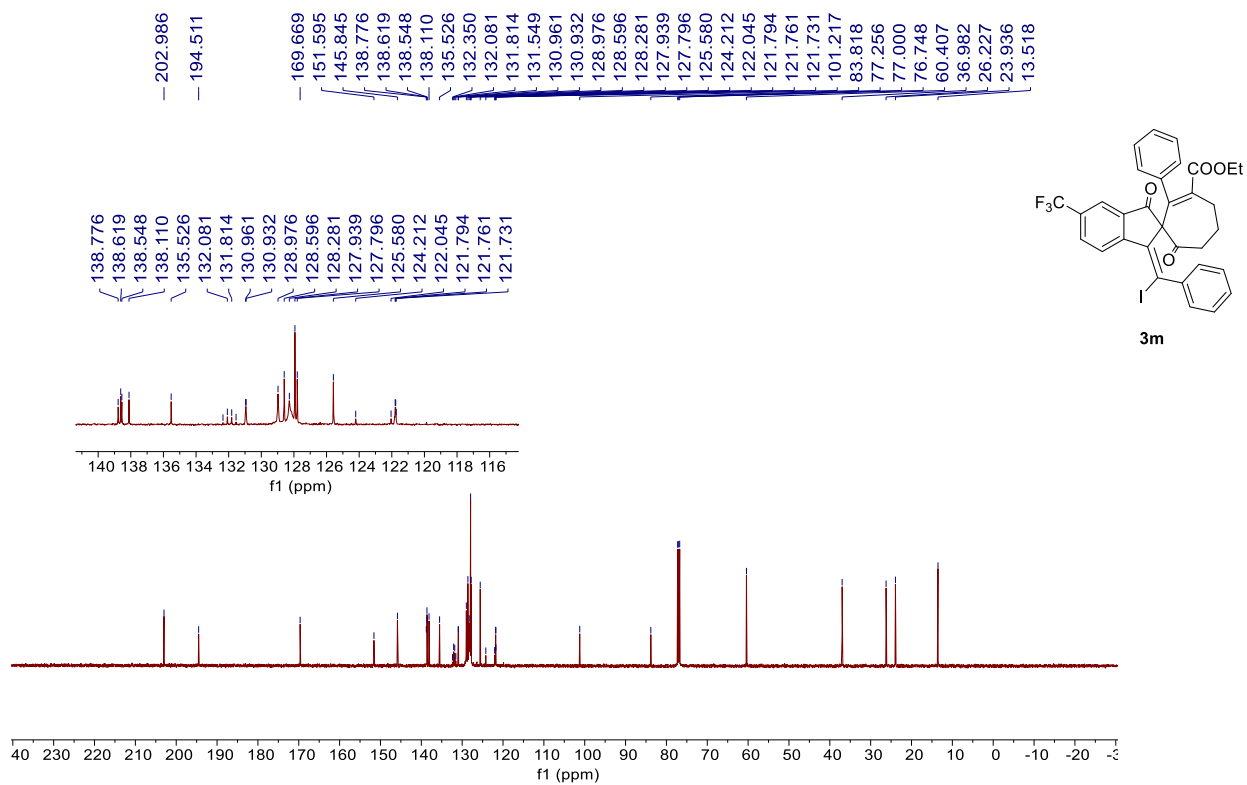

$^{19}\text{F}$  NMR (471 MHz,  $\text{CDCl}_3$ )

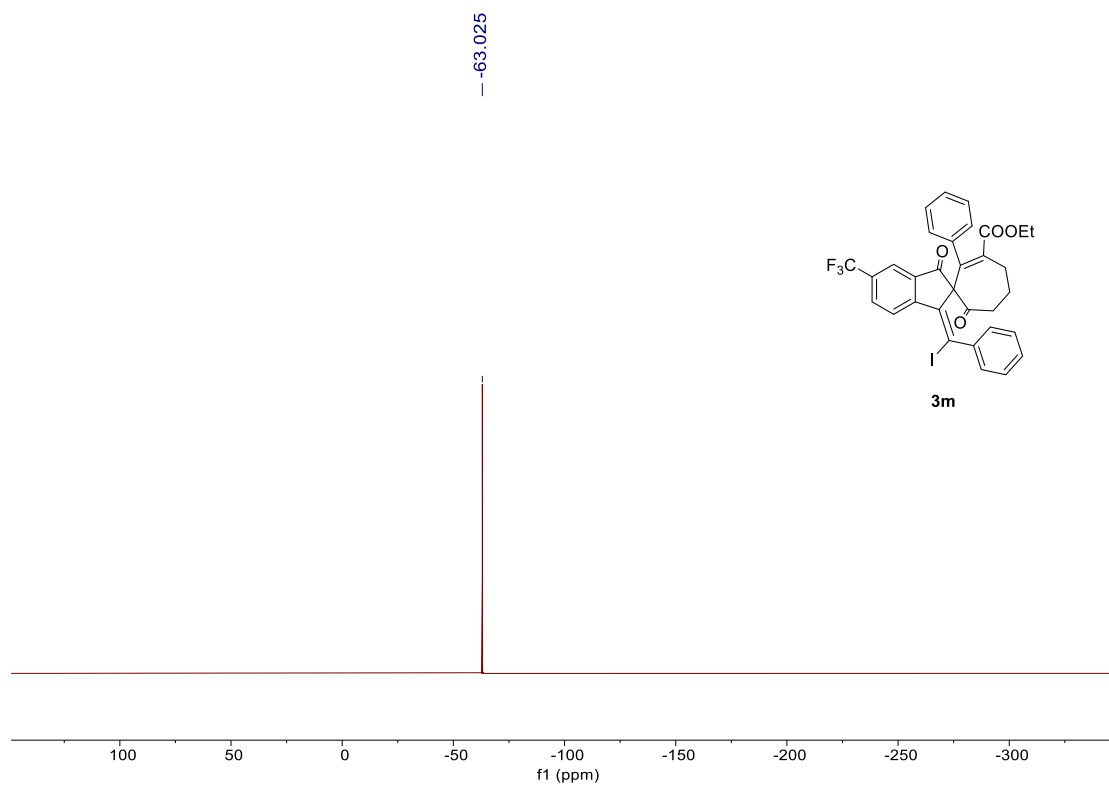



<sup>1</sup>H NMR (500 MHz, CDCl<sub>3</sub>)

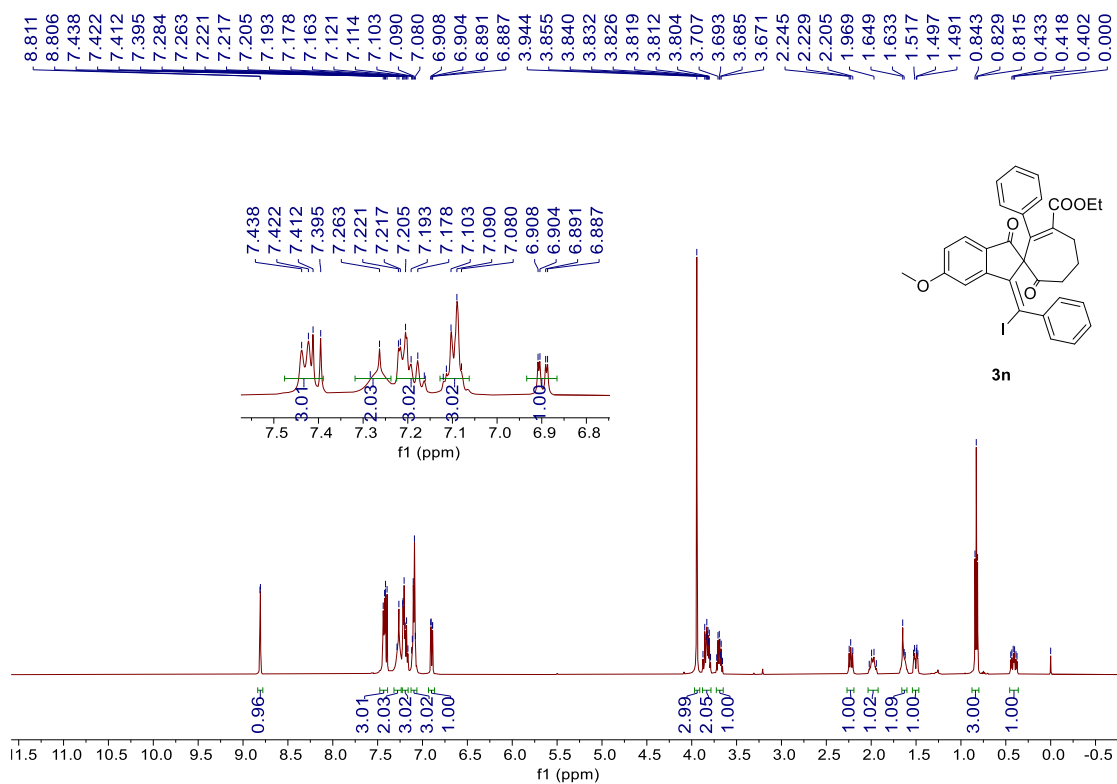

<sup>13</sup>C NMR (125 MHz, CDCl<sub>3</sub>)

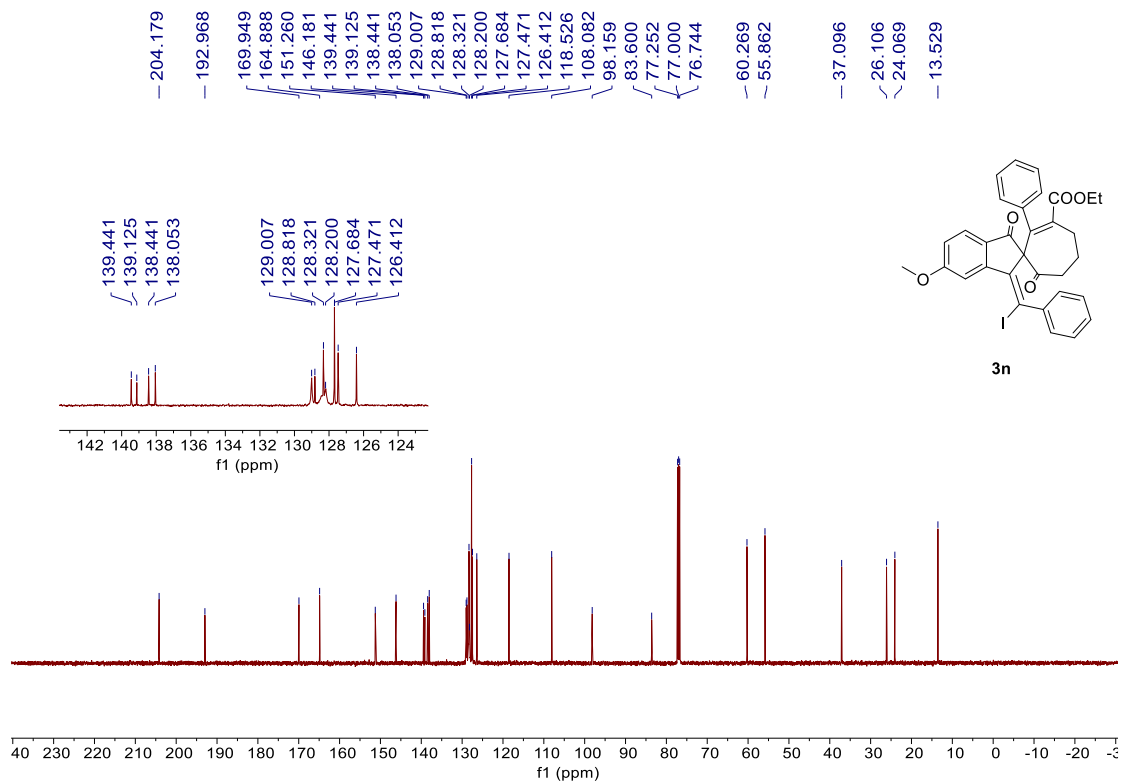

$^1\text{H}$  NMR (500 MHz,  $\text{CDCl}_3$ )

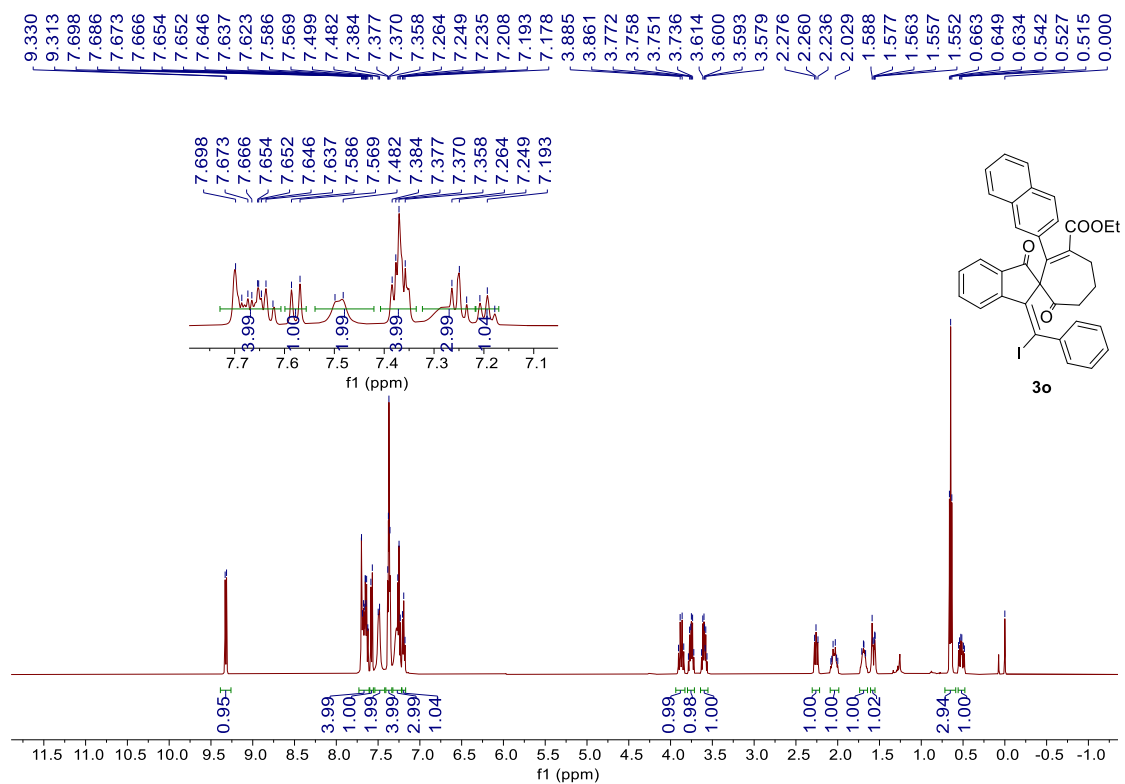

$^{13}\text{C}$  NMR (125 MHz,  $\text{CDCl}_3$ )

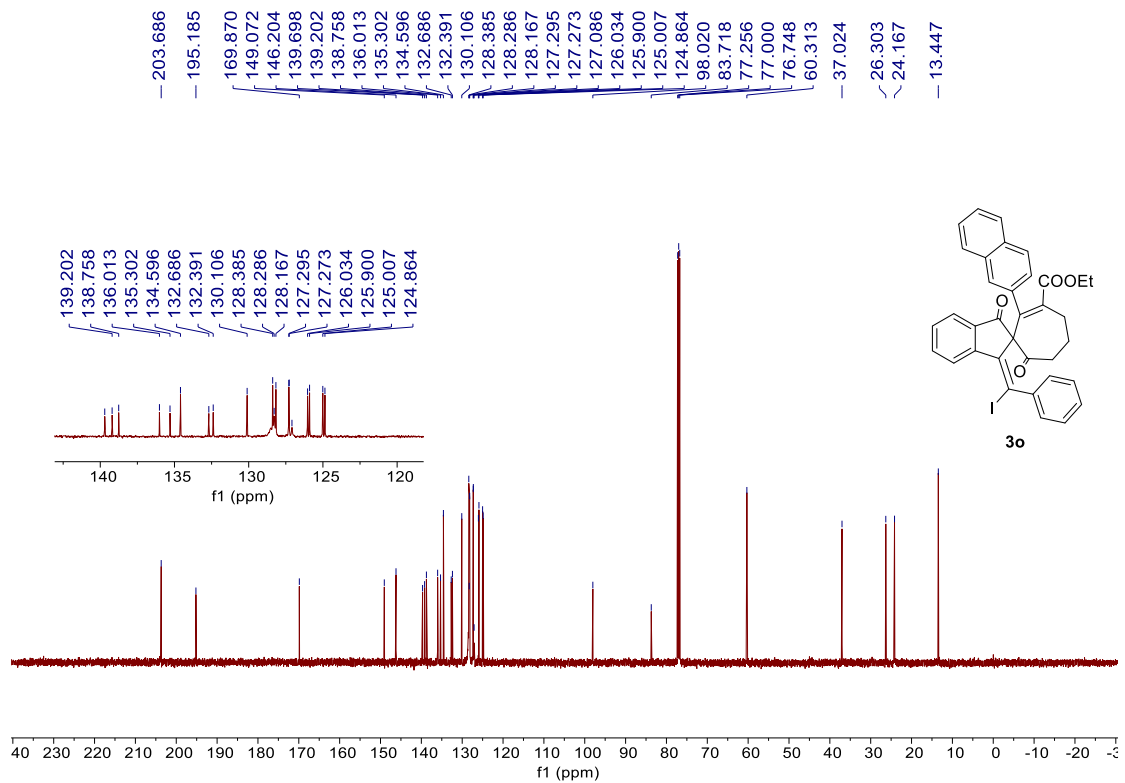

$^1\text{H}$  NMR (600 MHz,  $\text{CDCl}_3$ )

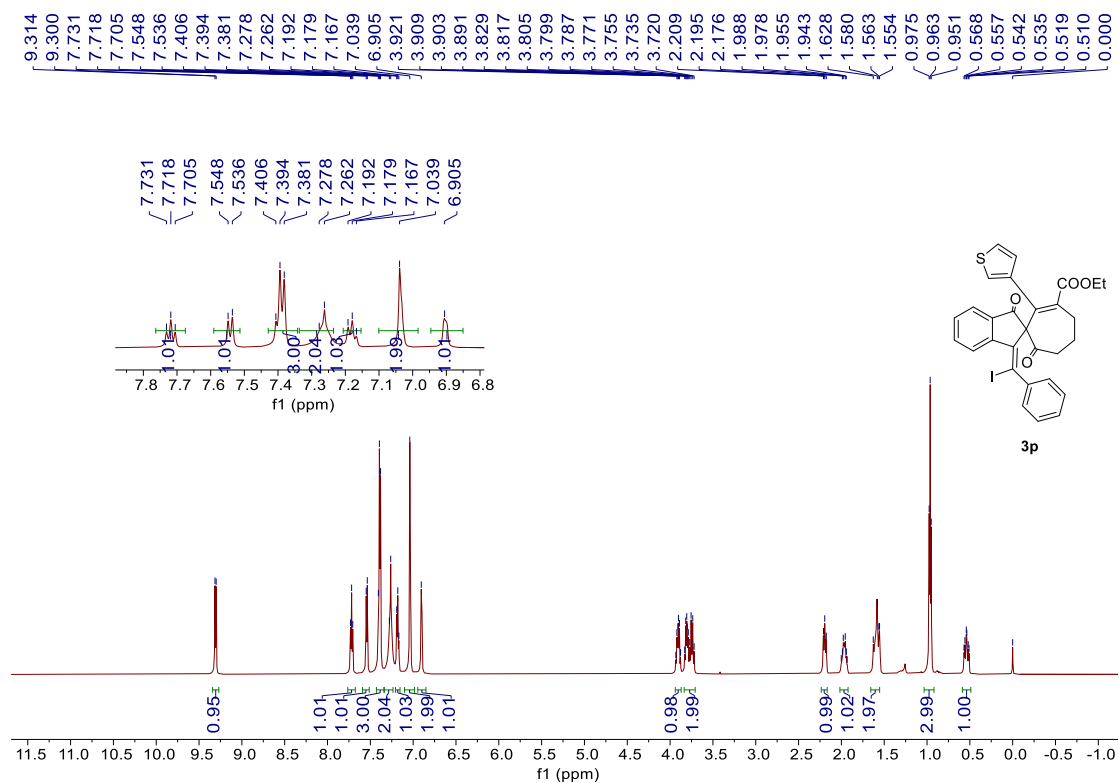

$^{13}\text{C}$  NMR (150 MHz,  $\text{CDCl}_3$ )

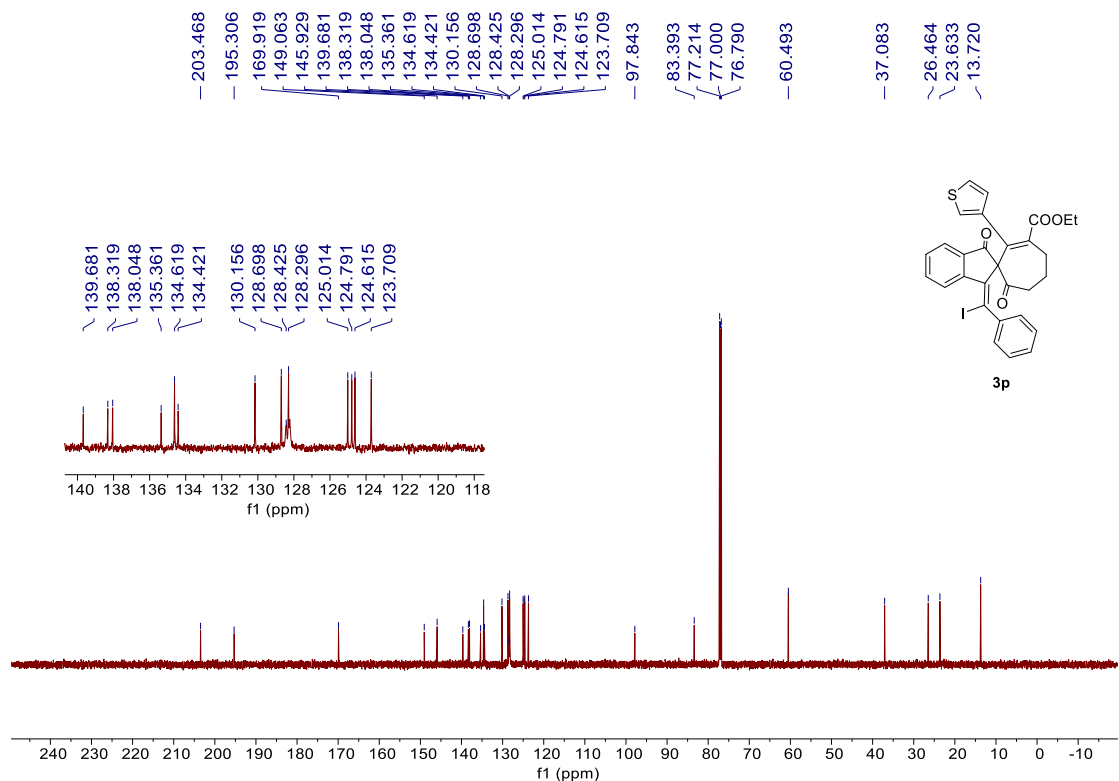

<sup>1</sup>H NMR (500 MHz, CDCl<sub>3</sub>)

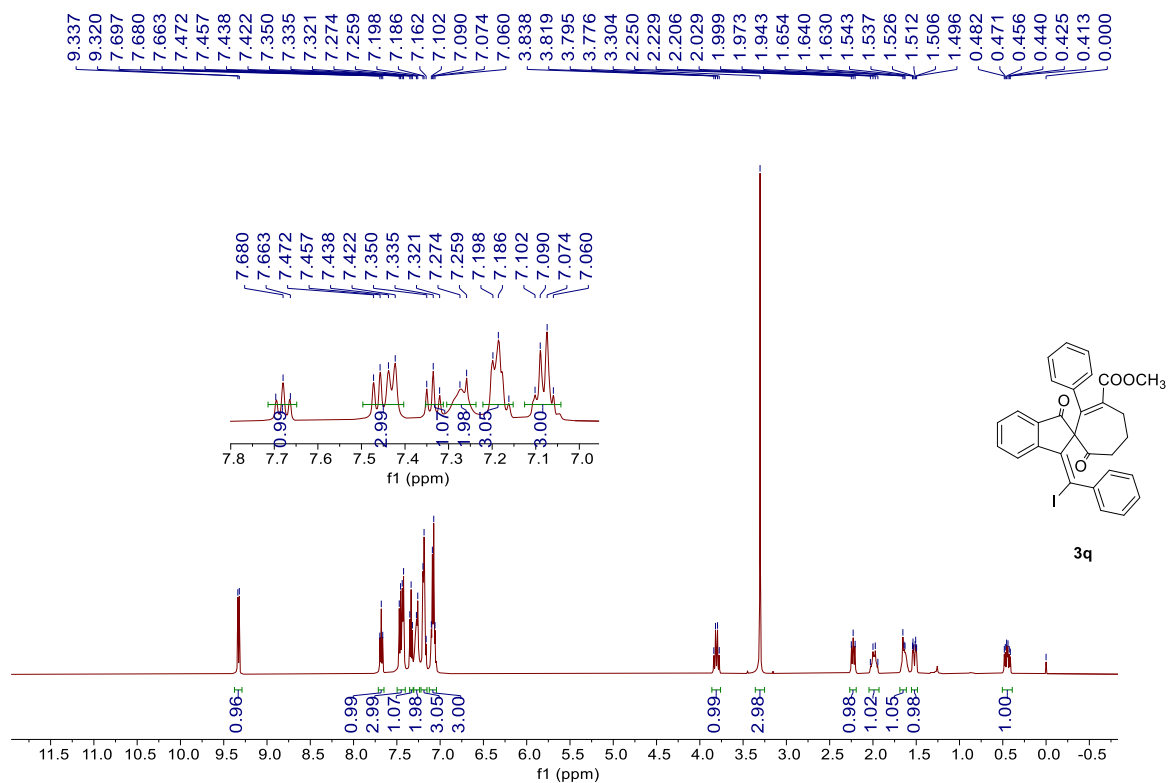

<sup>13</sup>C NMR (125 MHz, CDCl<sub>3</sub>)

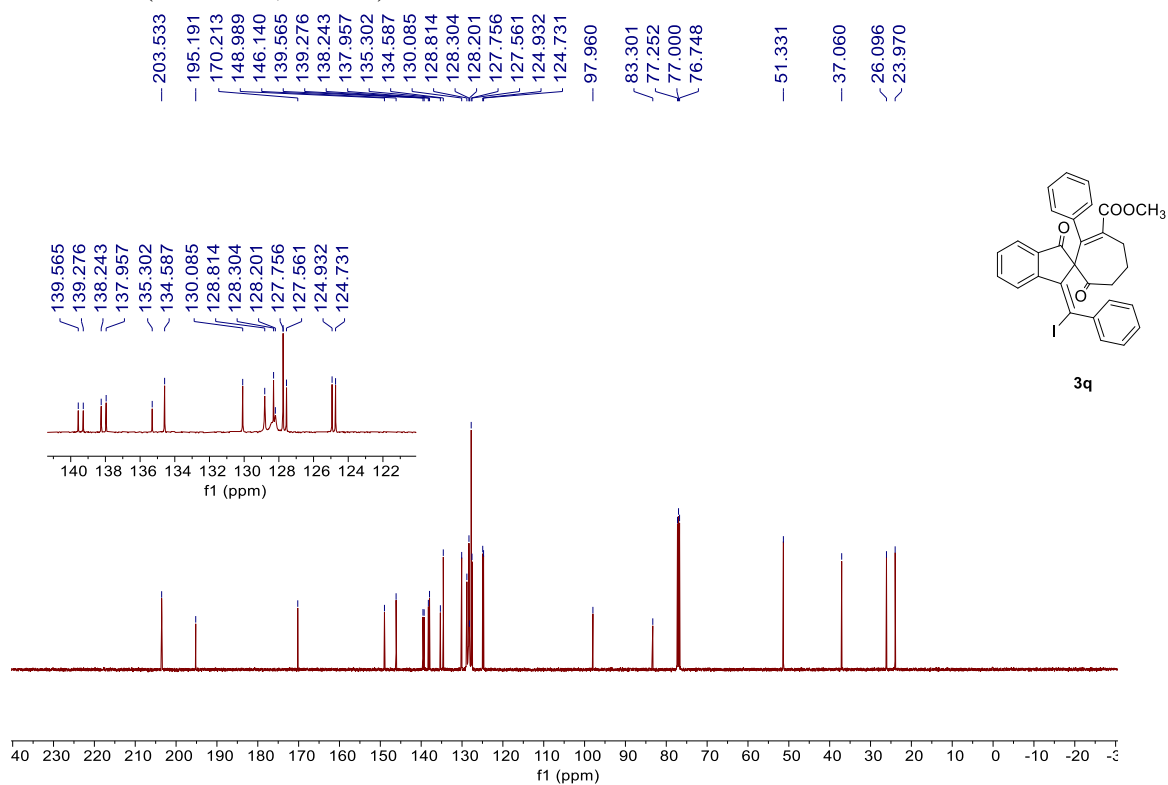

<sup>1</sup>H NMR (500 MHz, CDCl<sub>3</sub>)

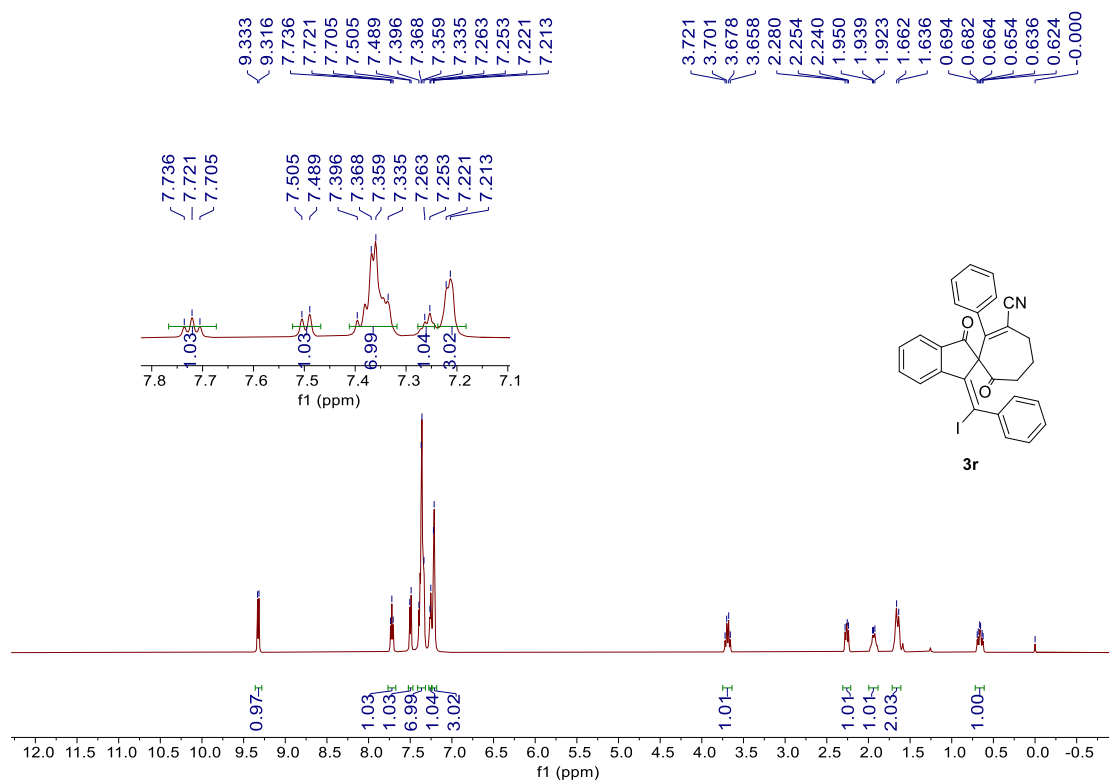

<sup>13</sup>C NMR (125 MHz, CDCl<sub>3</sub>)

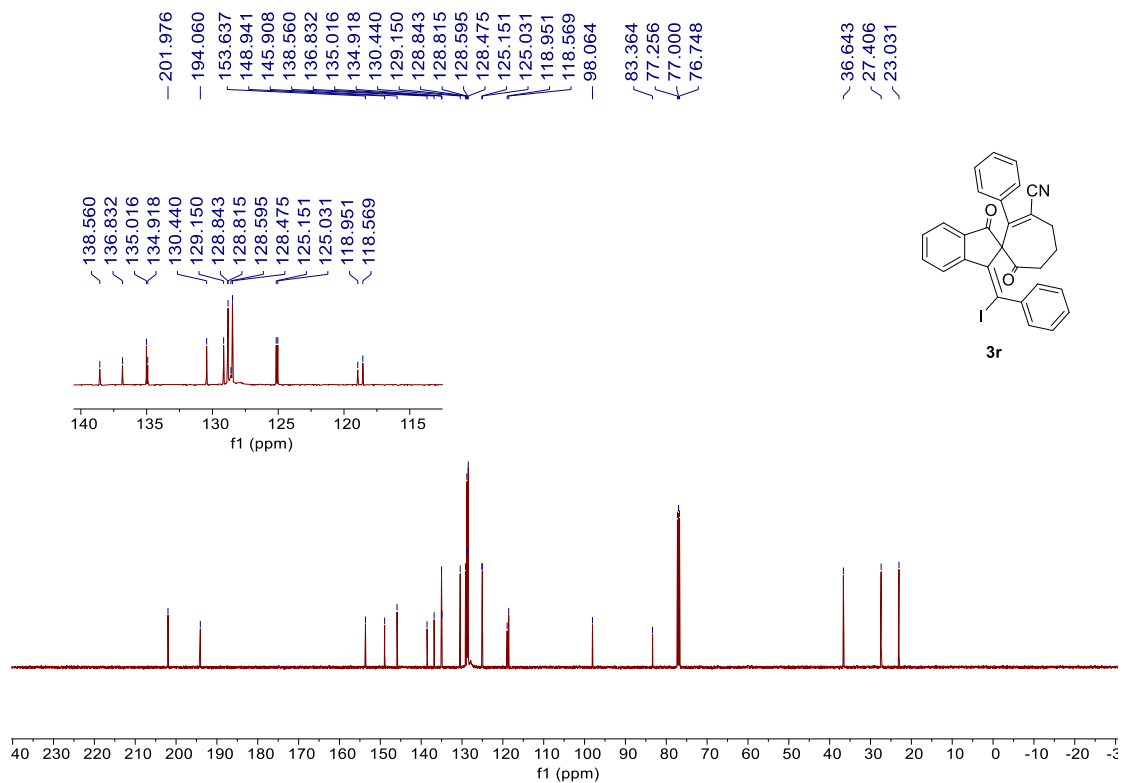

<sup>1</sup>H NMR (500 MHz, CDCl<sub>3</sub>)

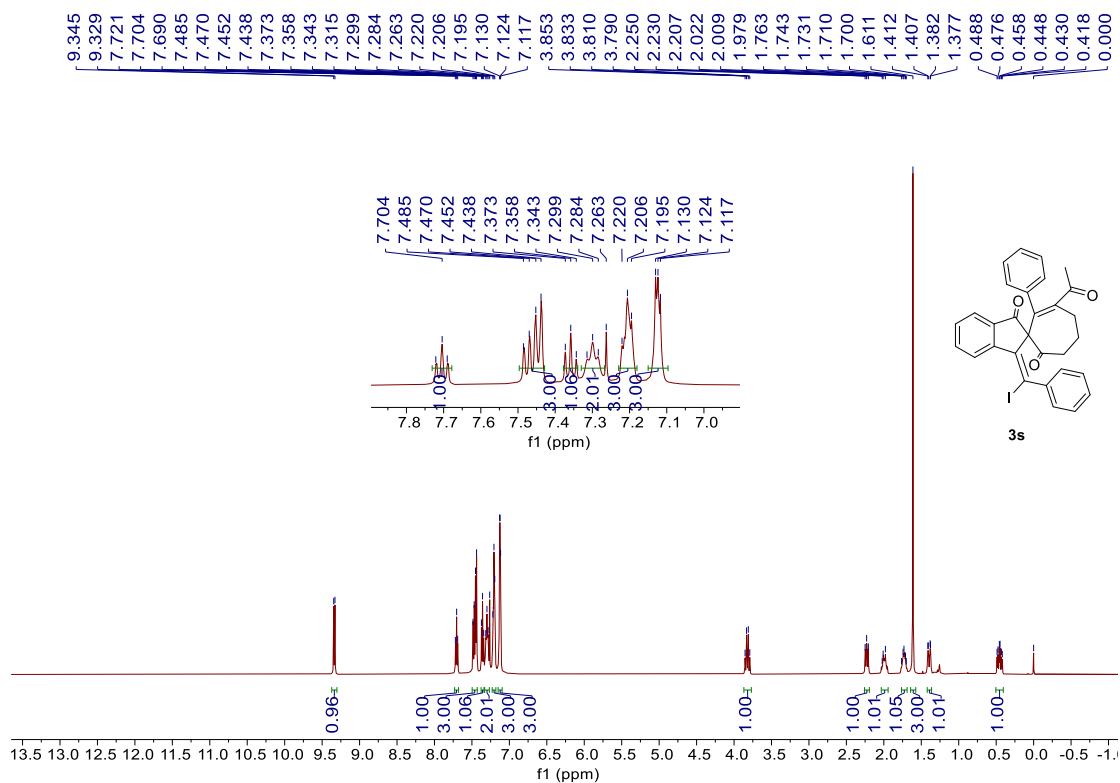

<sup>13</sup>C NMR (125 MHz, CDCl<sub>3</sub>)

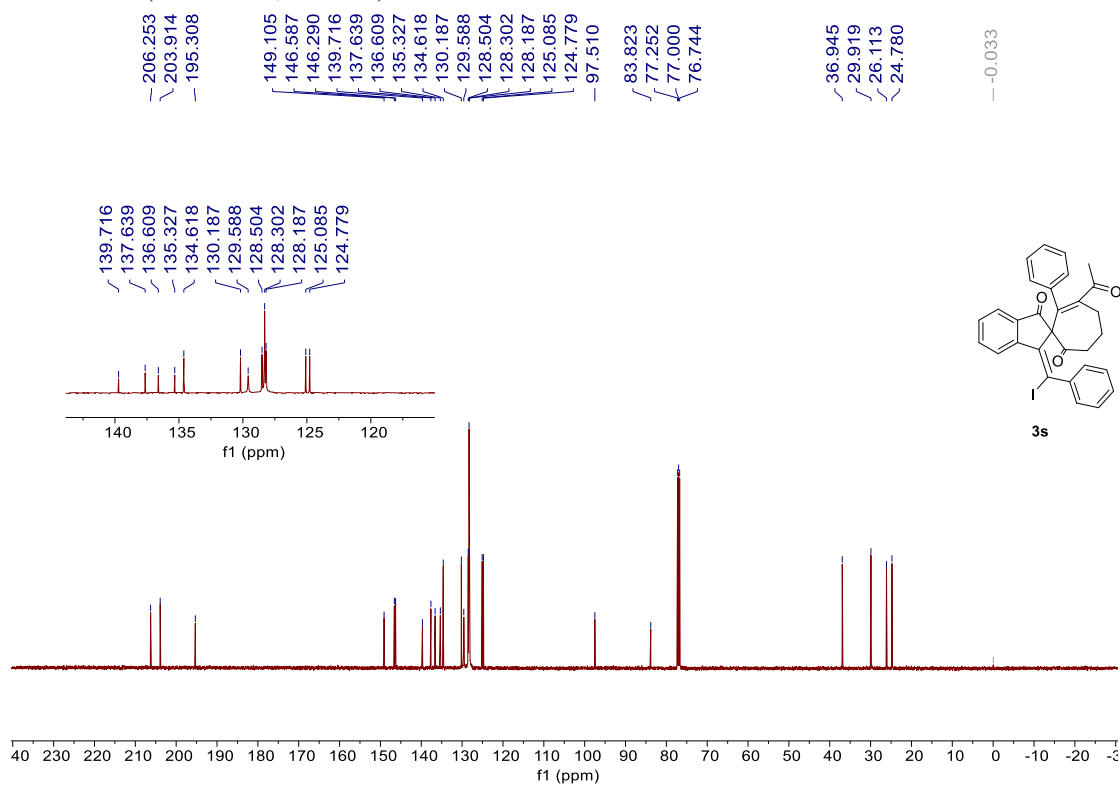

<sup>1</sup>H NMR (500 MHz, CDCl<sub>3</sub>)

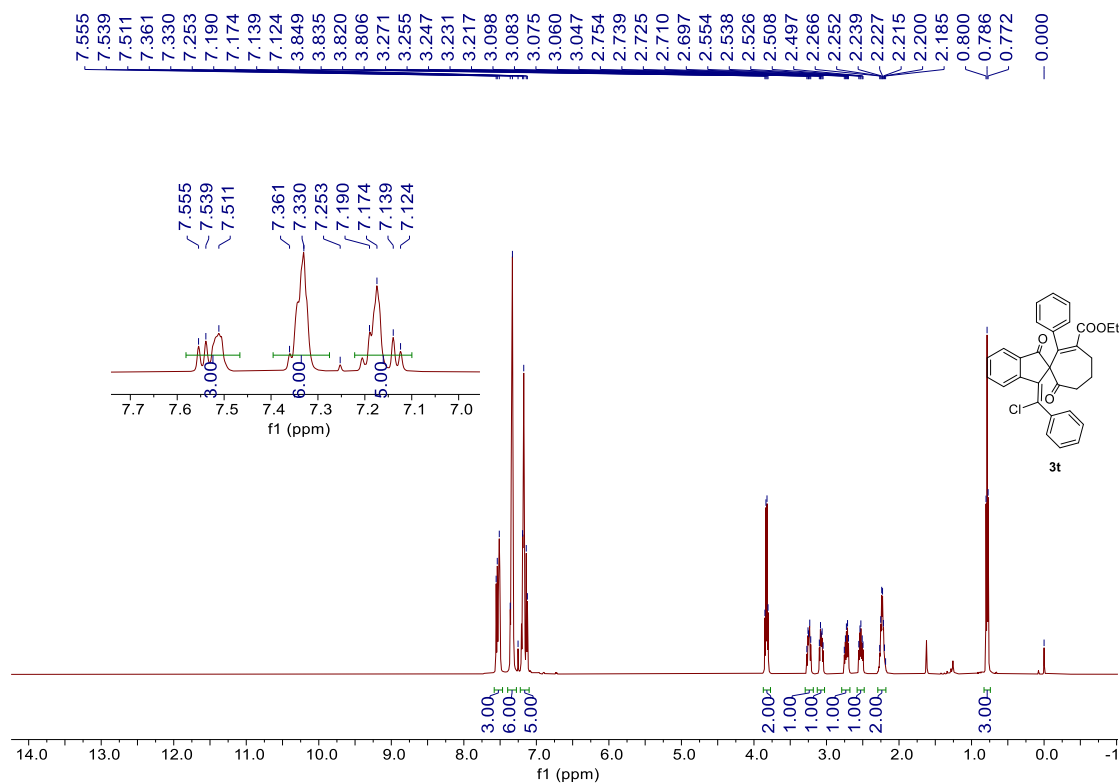

<sup>13</sup>C NMR (125 MHz, CDCl<sub>3</sub>)

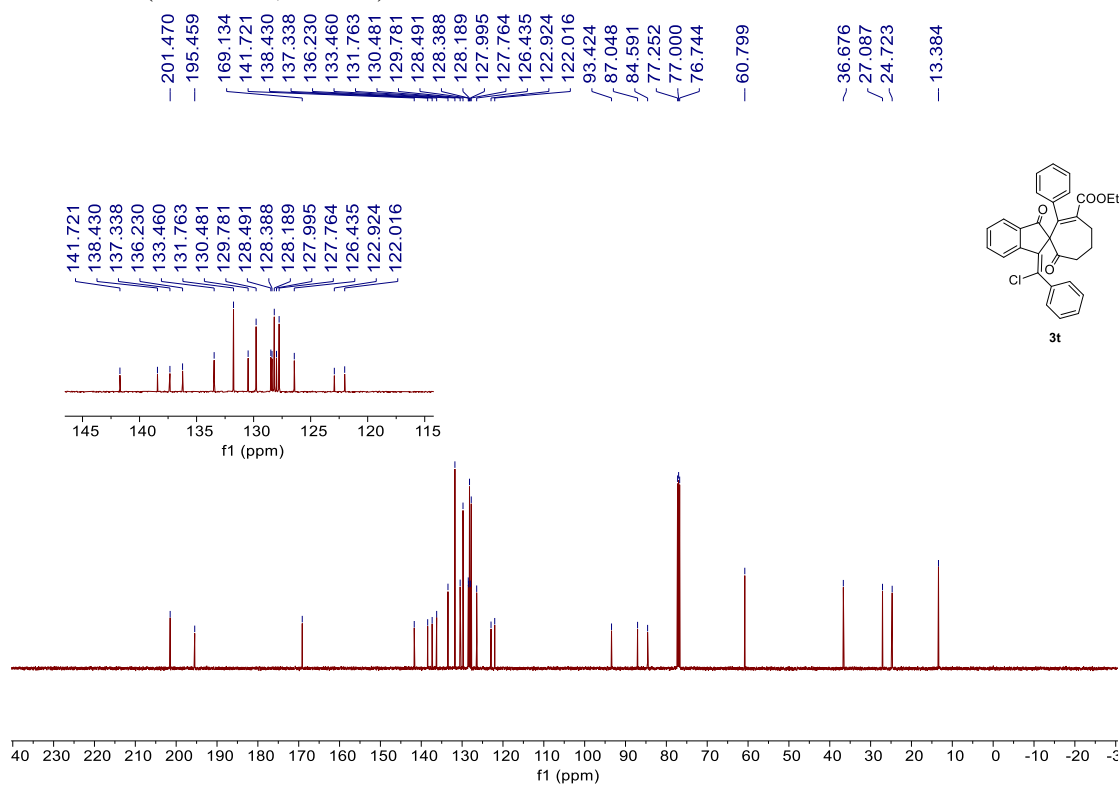

<sup>1</sup>H NMR (600 MHz, CDCl<sub>3</sub>)

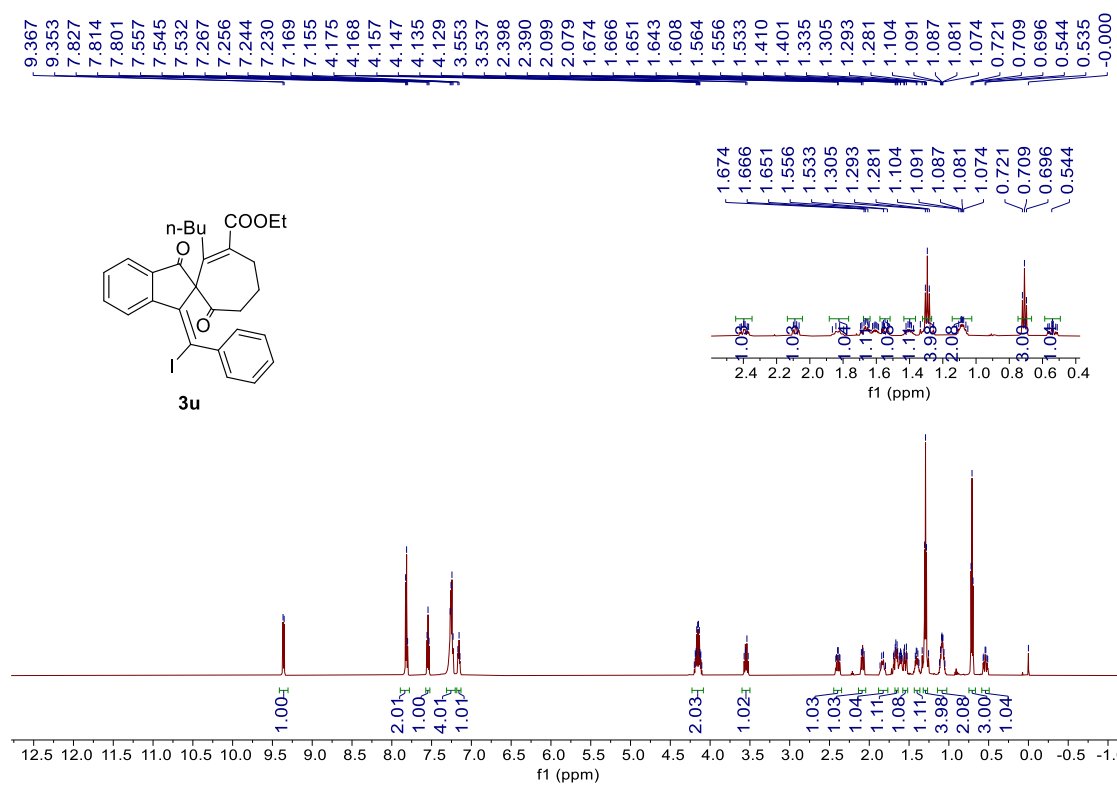

<sup>13</sup>C NMR (150 MHz, CDCl<sub>3</sub>)

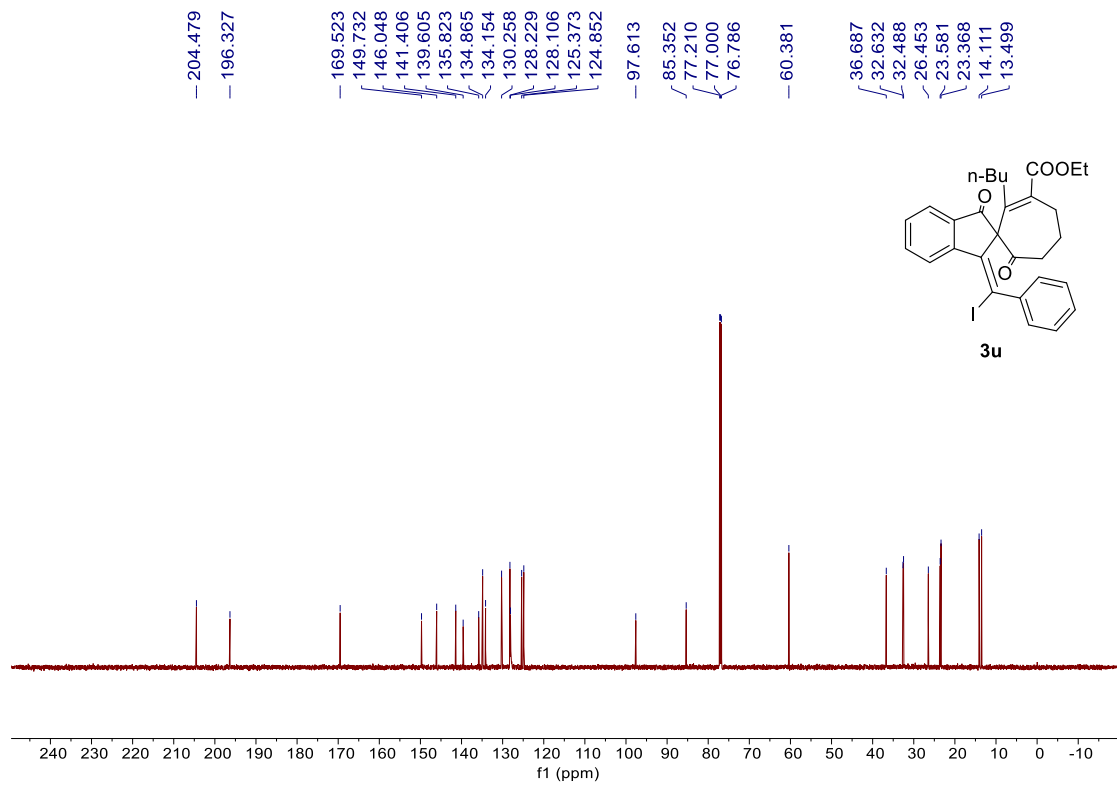



$^1\text{H}$  NMR (600 MHz,  $\text{CDCl}_3$ )

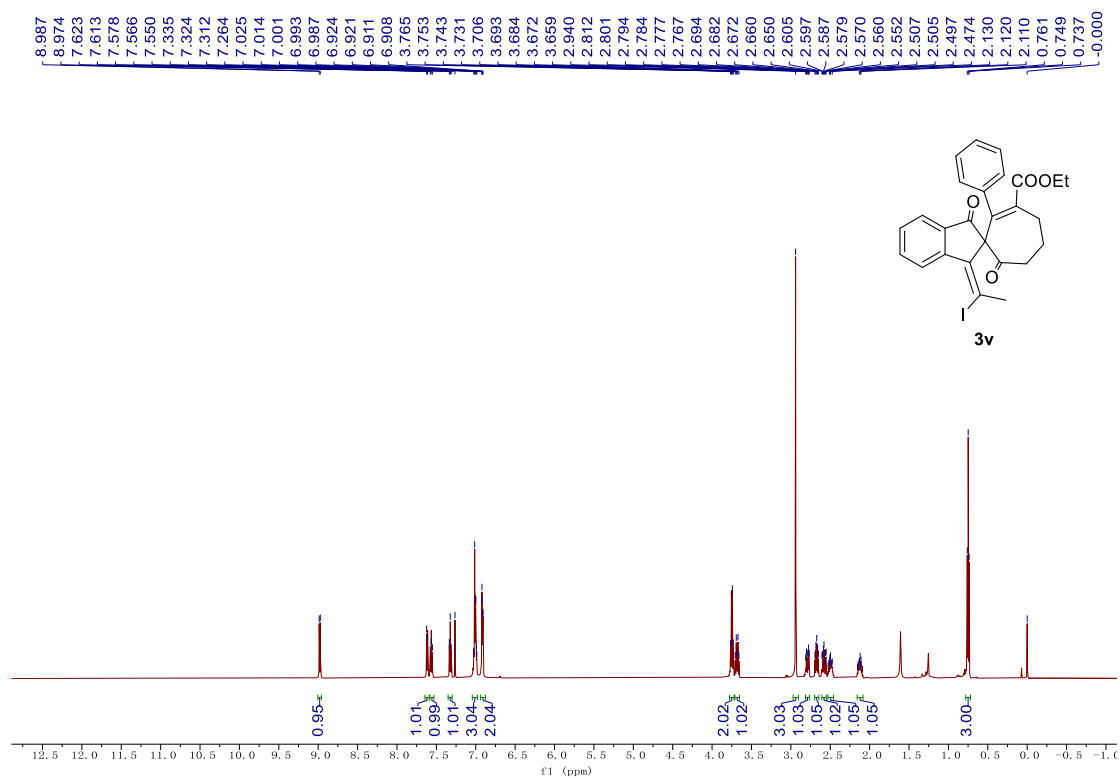

$^{13}\text{C}$  NMR (150 MHz,  $\text{CDCl}_3$ )

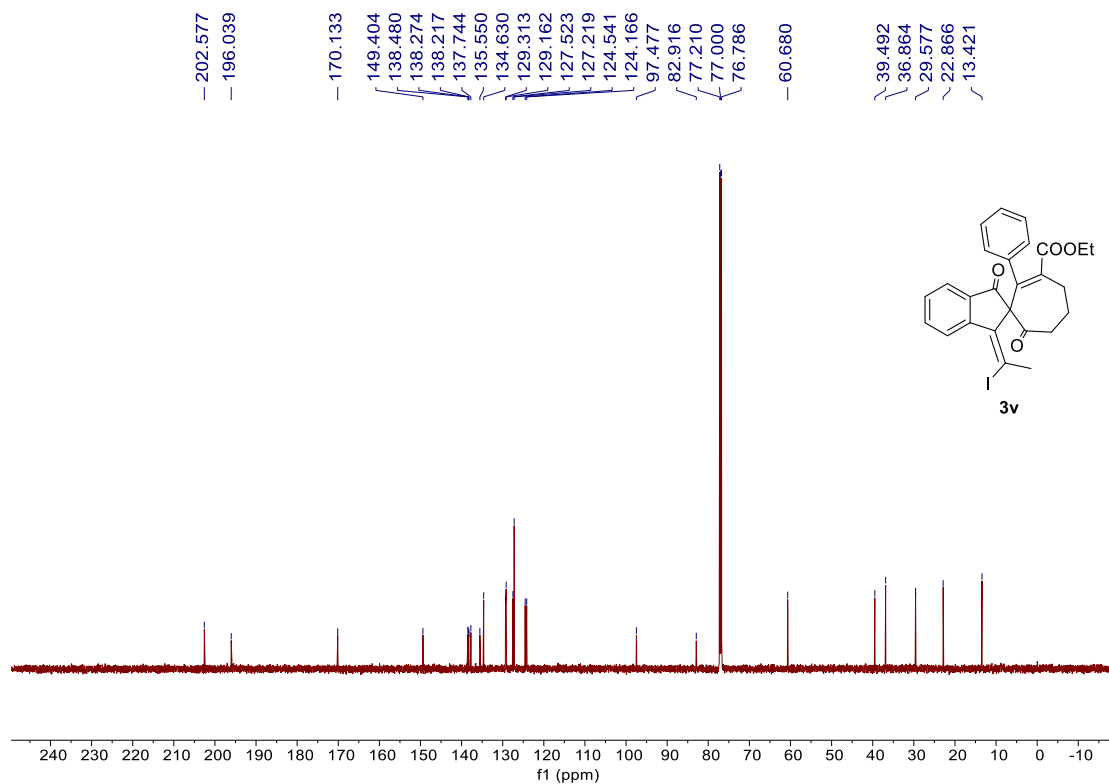

<sup>1</sup>H NMR (500 MHz, CDCl<sub>3</sub>)

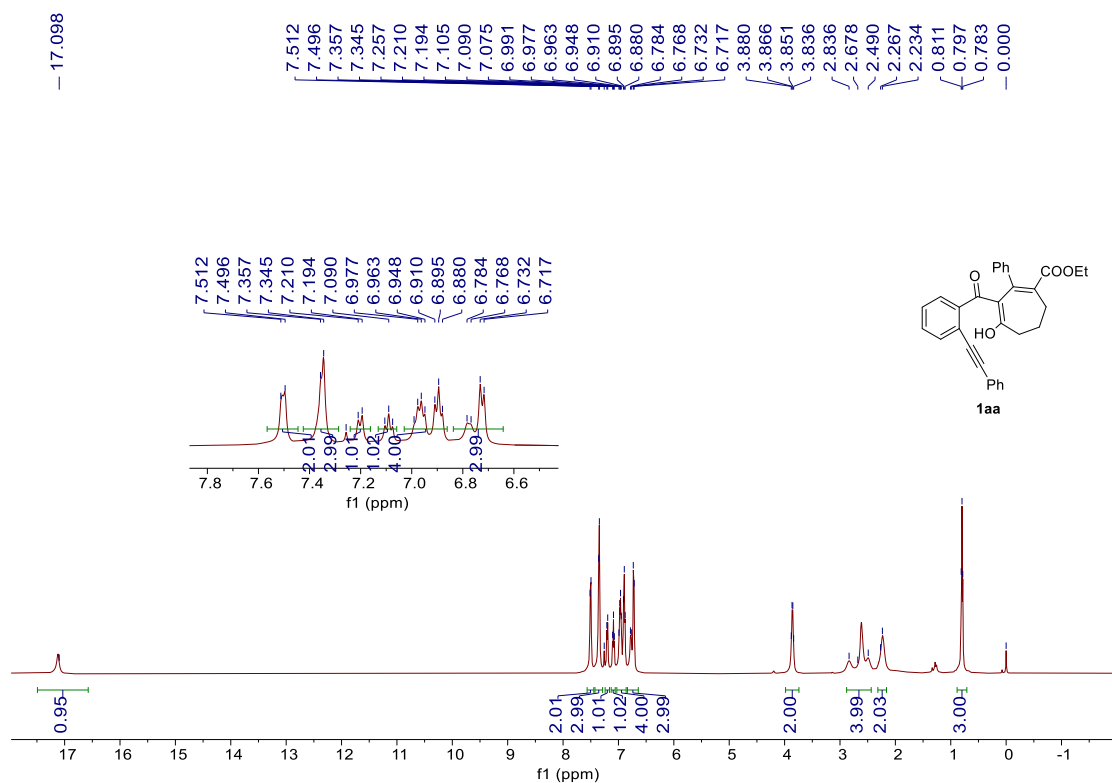

<sup>13</sup>C NMR (125 MHz, CDCl<sub>3</sub>)

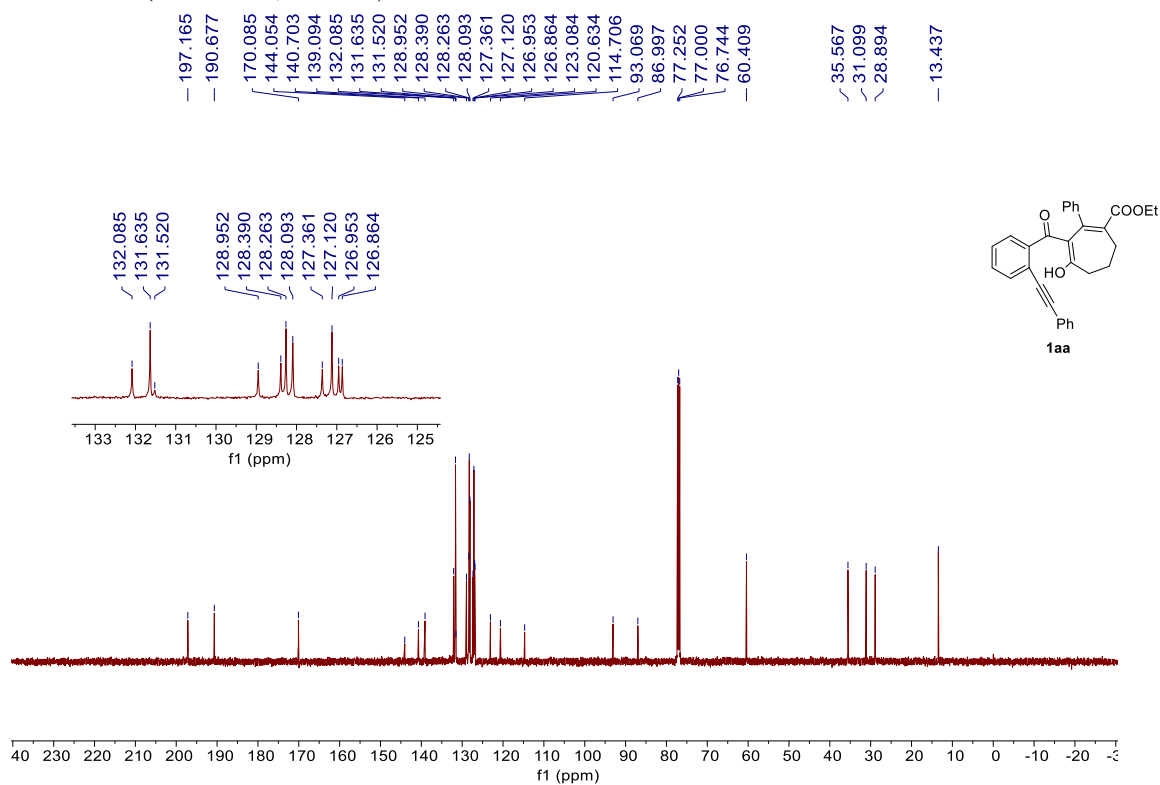

<sup>1</sup>H NMR (500 MHz, CDCl<sub>3</sub>)

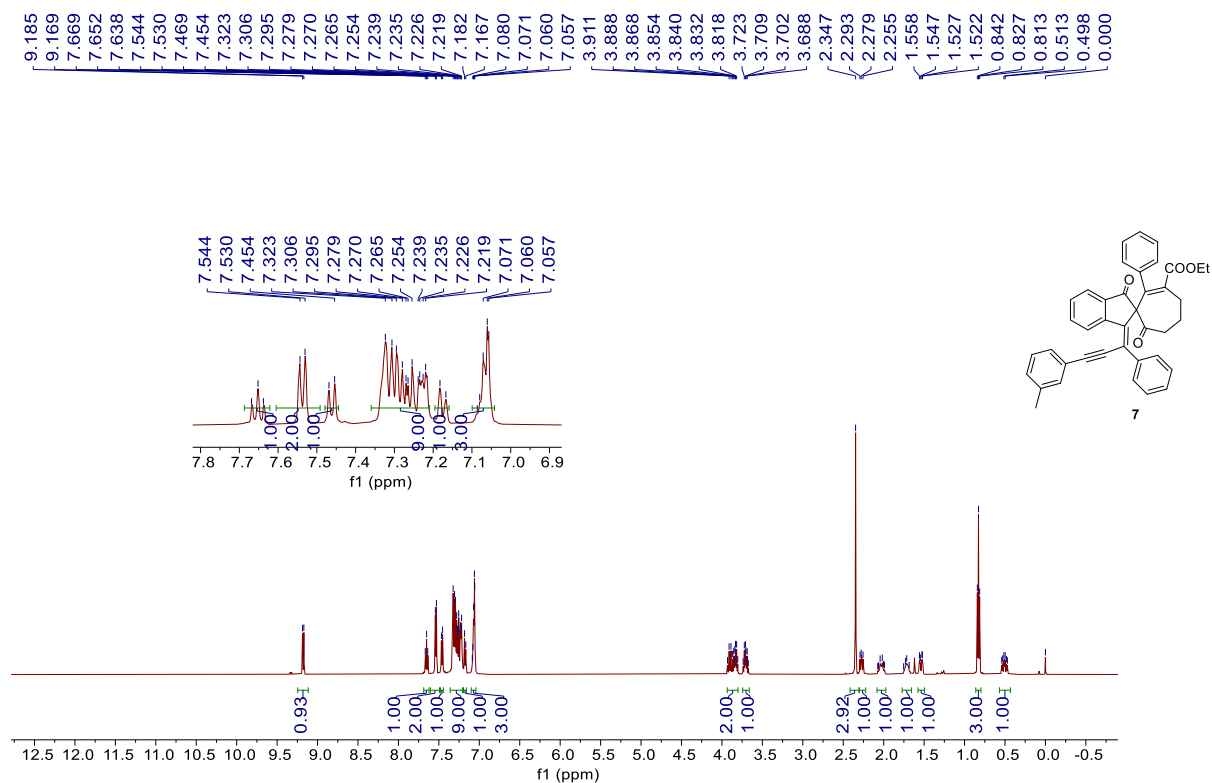

<sup>13</sup>C NMR (125 MHz, CDCl<sub>3</sub>)

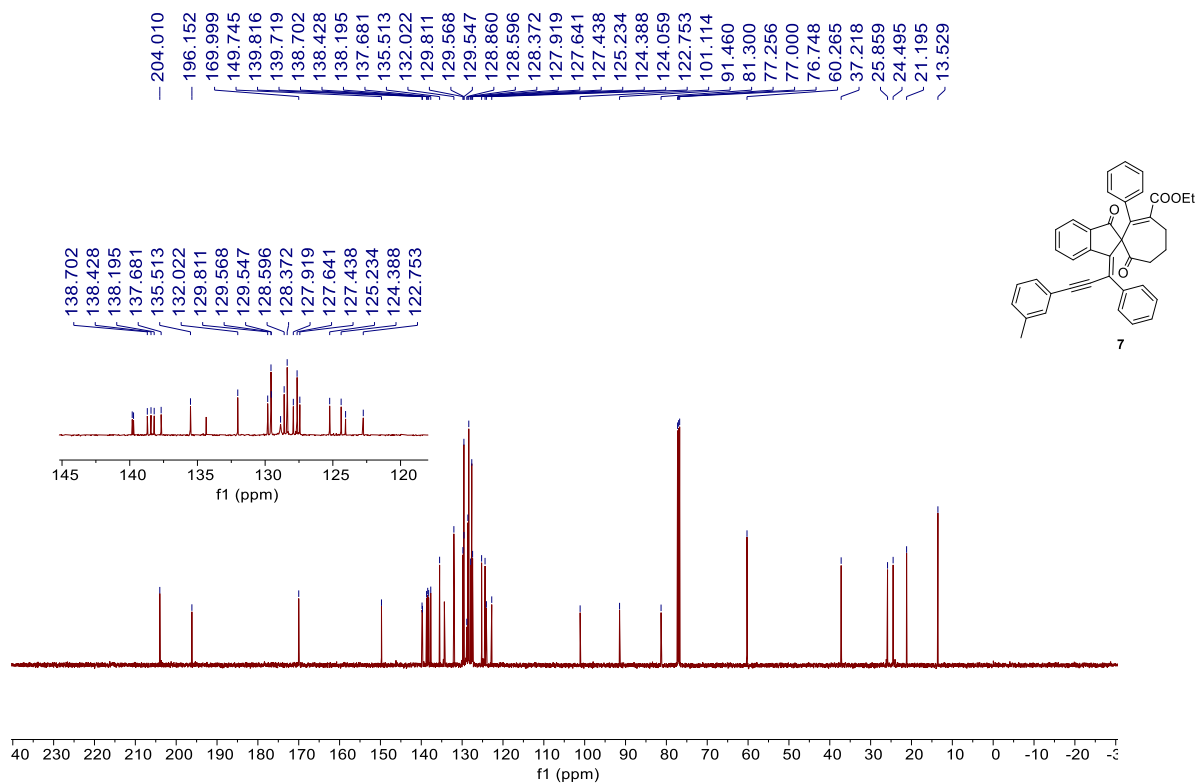

$^1\text{H}$  NMR (500 MHz,  $\text{CDCl}_3$ )

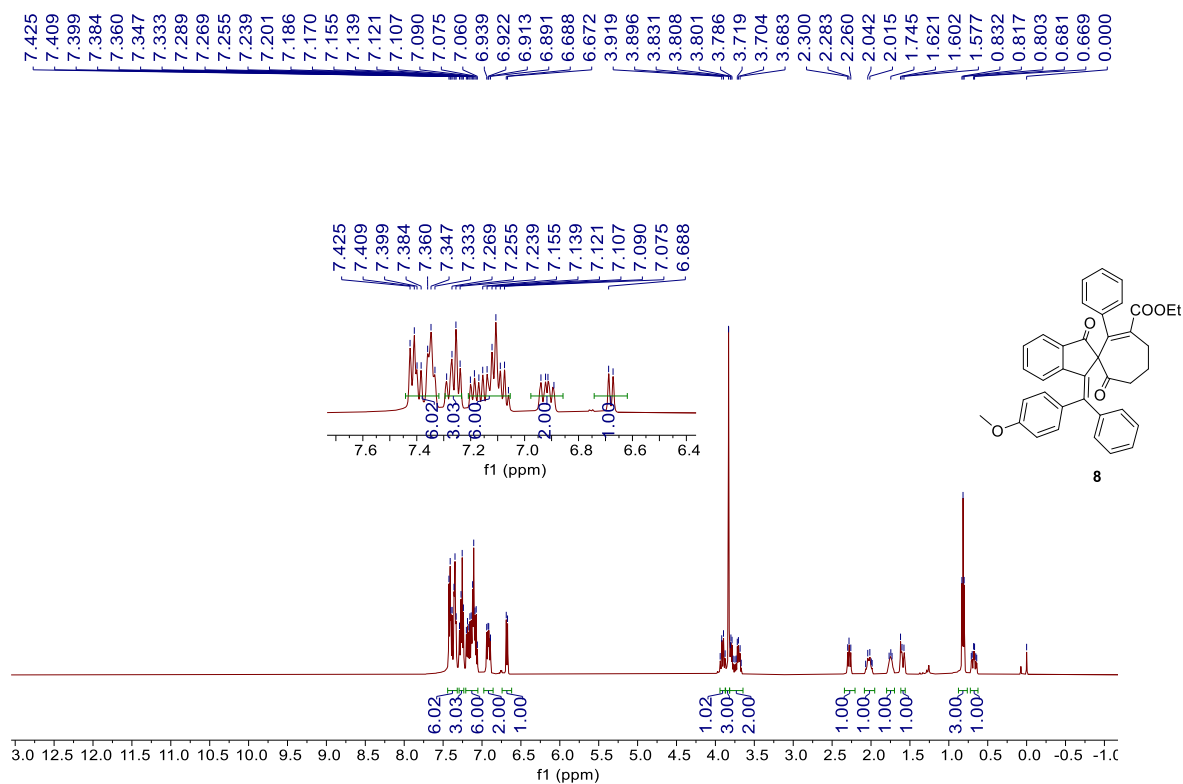

$^{13}\text{C}$  NMR (125 MHz,  $\text{CDCl}_3$ )

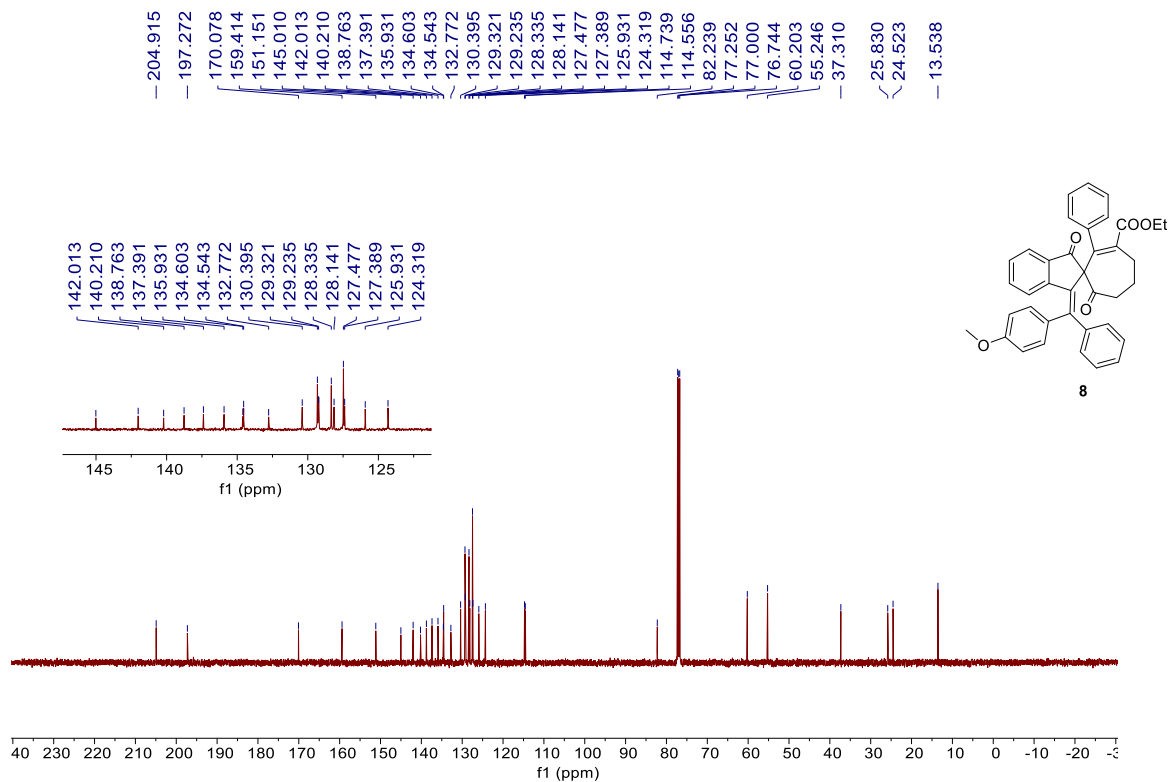

$^1\text{H}$  NMR (500 MHz,  $\text{CDCl}_3$ )

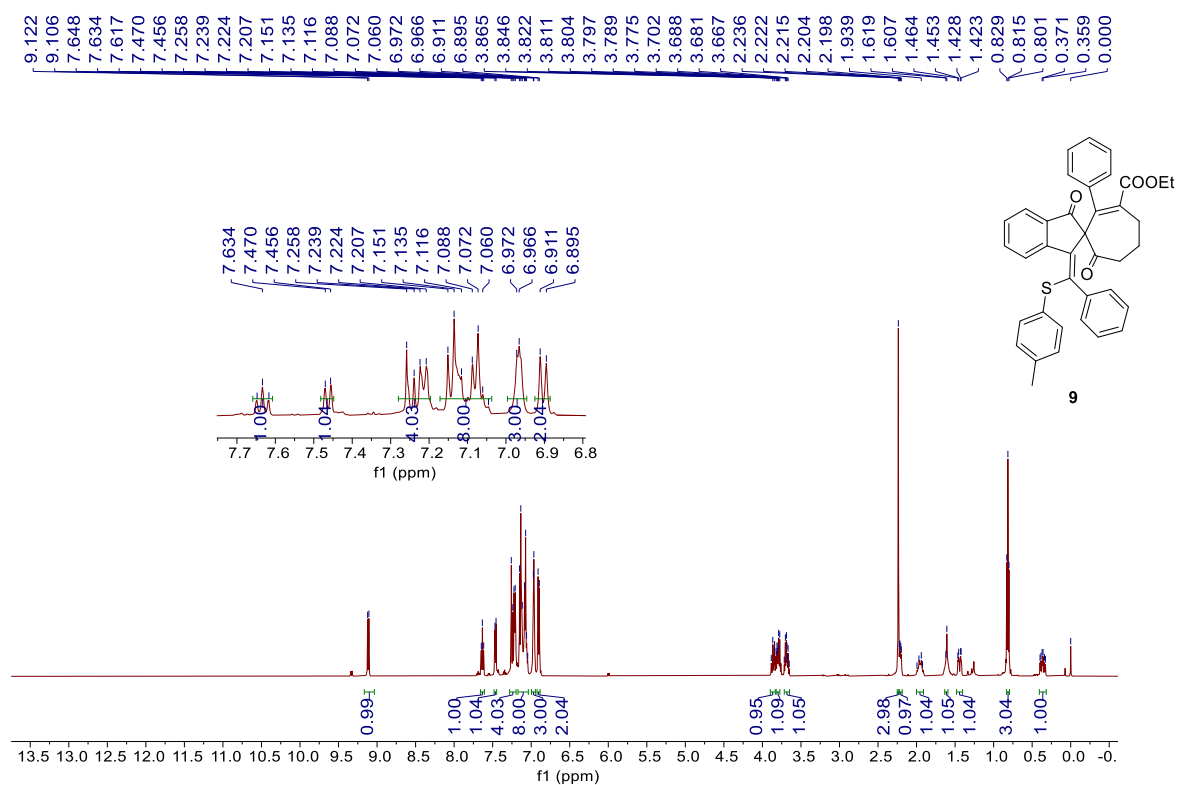

$^{13}\text{C}$  NMR (125 MHz,  $\text{CDCl}_3$ )

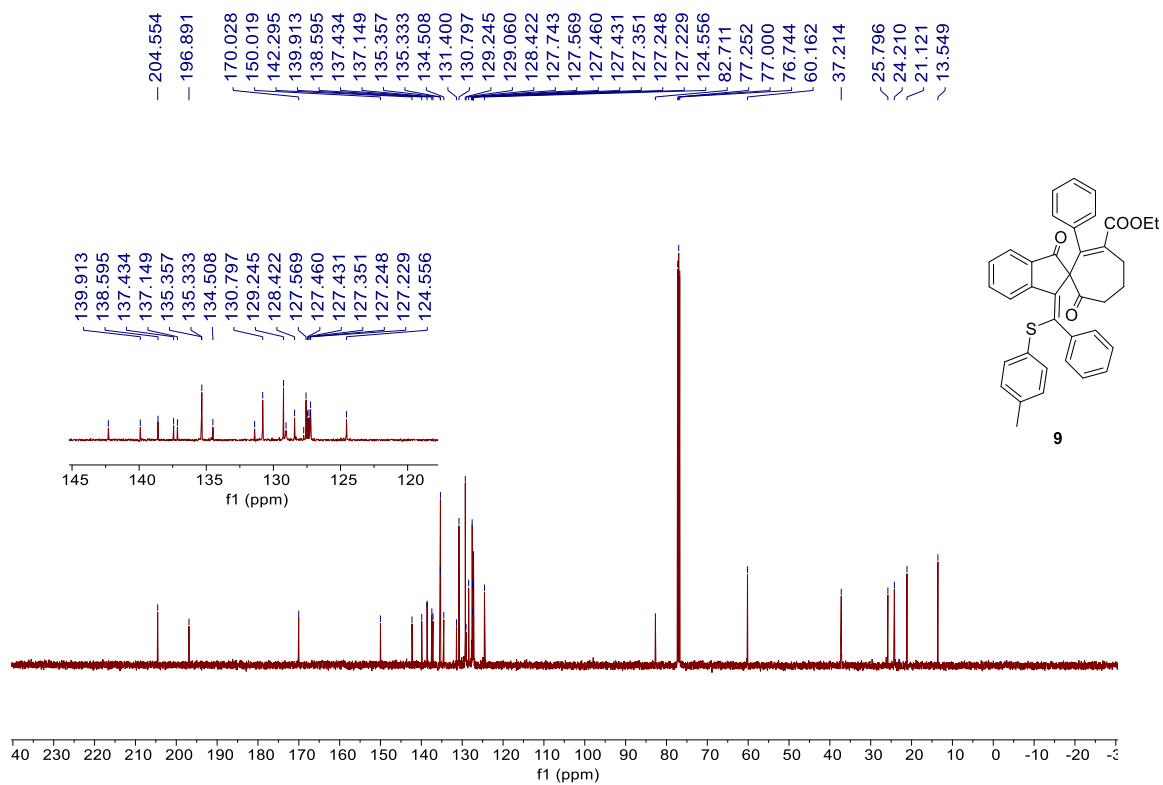

## 10. X-ray crystallography of compound 3a.

*Ethyl (E)-1'-(iodo(phenyl)methylene)-3',7-dioxo-2-phenyl-1',3'-dihydrospiro[cycloheptane-1,2'-inden]-2-ene-3-carboxylate (3a)*

(Ortep ellipsoids are depicted at the 50% level)

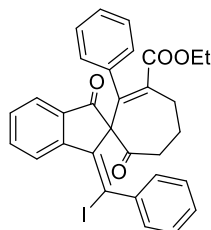

3a

**Table S1. Crystal data and structure refinement for 3a.**

|                                   |                                                                                        |
|-----------------------------------|----------------------------------------------------------------------------------------|
| Identification code               | <b>3a</b>                                                                              |
| Empirical formula                 | C <sub>31</sub> H <sub>25</sub> IO <sub>4</sub>                                        |
| Formula weight                    | 588.41                                                                                 |
| Temperature                       | 213(2) K                                                                               |
| Wavelength                        | 0.71073 Å                                                                              |
| Crystal system                    | Orthorhombic                                                                           |
| Space group                       | Pca 21                                                                                 |
| Unit cell dimensions              | a = 17.4166(4) Å, α = 90°.<br>b = 10.3859(3) Å, β = 90°.<br>c = 27.8098(8) Å, γ = 90°. |
| Volume                            | 5030.4(2) Å <sup>3</sup>                                                               |
| Z                                 | 8                                                                                      |
| Density (calculated)              | 1.554 Mg/m <sup>3</sup>                                                                |
| Absorption coefficient            | 1.309 mm <sup>-1</sup>                                                                 |
| F(000)                            | 2368                                                                                   |
| Crystal size                      | 0.160 × 0.130 × 0.090 mm <sup>3</sup>                                                  |
| Theta range for data collection   | 1.961 to 25.996°.                                                                      |
| Index ranges                      | -21 ≤ h ≤ 21, -12 ≤ k ≤ 12, -34 ≤ l ≤ 34                                               |
| Reflections collected             | 67394                                                                                  |
| Independent reflections           | 9844 [R(int) = 0.0569]                                                                 |
| Completeness to theta = 25.242°   | 99.8 %                                                                                 |
| Absorption correction             | Semi-empirical from equivalents                                                        |
| Max. and min. transmission        | 0.7456 and 0.5728                                                                      |
| Data / restraints / parameters    | 9844 / 1 / 651                                                                         |
| Goodness-of-fit on F <sup>2</sup> | 1.035                                                                                  |
| Final R indices [I > 2σ(I)]       | R <sub>1</sub> = 0.0335, wR <sub>2</sub> = 0.0750                                      |
| R indices (all data)              | R <sub>1</sub> = 0.0434, wR <sub>2</sub> = 0.0799                                      |
| Extinction coefficient            | n/a                                                                                    |
| Largest diff. peak and hole       | 1.535 and -0.764 e.Å <sup>-3</sup>                                                     |

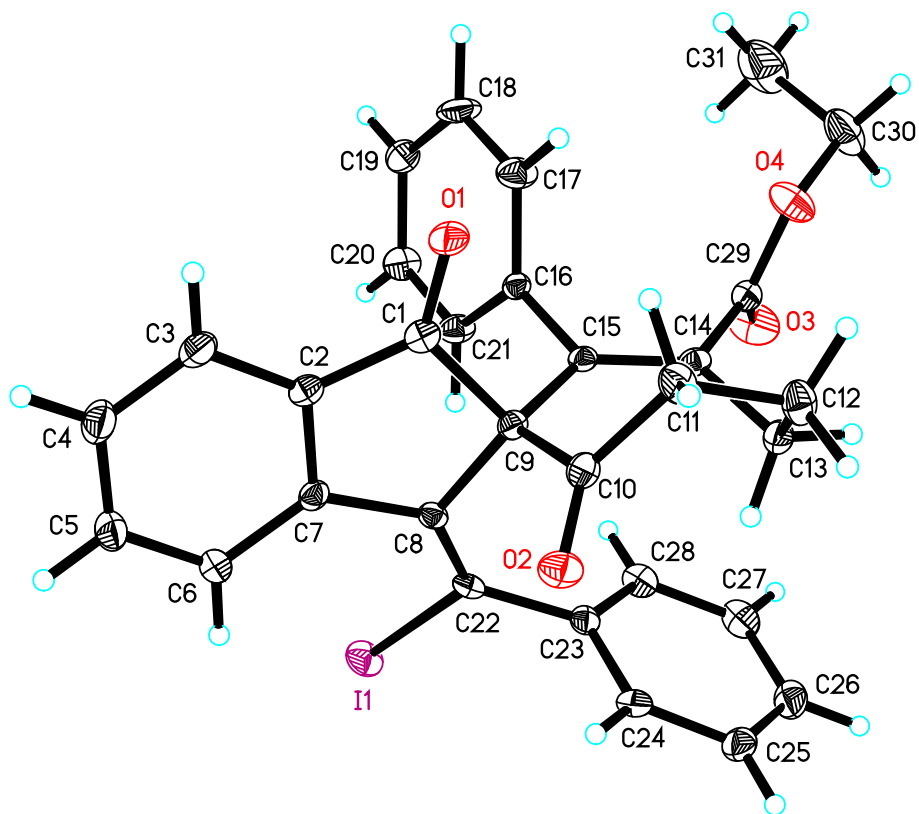

Supplement: d4qo01632g1.pdf [file d4qo01632g1.pdf]
